# Supplementary material for: Enantioselective Friedel–Crafts alkylation of indoles with 2-enoylpyridine-N-oxides catalyzed by glucoBOX-Cu(ii) complex
Source: Royal Society of Chemistry journal article supplement (doi:10.1039/c2ob25315a), 2012-01-01

## Supporting Information.

### Enantioselective Friedel-Crafts Alkylation of Indoles with 2-Enoylpyridine-N-Oxides Catalyzed by *gluco*BOX-Cu(II) complex.

Jimil George,<sup>a</sup> B. V. Subba Reddy.\*<sup>a</sup>

<sup>a</sup> *Natural Product Chemistry, CSIR-Indian Institute of Chemical Technology, Hyderabad, Andhrapradesh, India, 500 007. E-mail: basireddy@iict.res.in; Fax: 91-40-27160512.*

---

#### Table of contents.

|                                                                                       |       |
|---------------------------------------------------------------------------------------|-------|
| 1. General remarks .....                                                              | (S2)  |
| 2. Copy of NMR Spectra of ligands ( <b>1b</b> ). .....                                | (S3)  |
| 3. Copy of NMR Spectra of all compounds ( <b>4a-4u</b> ) and ( <b>5a-5b</b> ).....    | (S4)  |
| 4. Hplc chromatogram of all products. (4a- <b>4u</b> and 5a-5b).....                  | (S27) |
| 5. Copy of NMR Spectra of starting material <b>2f</b> , <b>2h</b> and <b>2j</b> ..... | (S50) |

## 1. General Remarks.

All the reactions were carried out under nitrogen atmosphere. Commercial reagents were used as received, unless otherwise stated. All the metal Lewis acids were purchased from commercial sources and used as such as without any further purification. Solvents used for all reaction were dried prior to use by standard procedure. Dichloromethane and chloroform were distilled from calcium hydride. THF and ether were dried over sodium. Methanol and toluene were purchased from commercial source and used as received.  $^1\text{H}$  NMR was recorded on a 300 MHz or 500 MHz spectrometer using  $\text{CDCl}_3$  as solvent.  $^{13}\text{C}$  NMR were recorded on 75 MHz spectrometer using  $\text{CDCl}_3$ . TMS was used as reference for  $^1\text{H}$  NMR analysis and  $\text{CDCl}_3$  used as reference for  $^{13}\text{C}$  NMR analysis. Ligands **1a-f** was prepared from glucosamine hydrochloride according to literature procedure.<sup>1</sup> All the starting materials i.e, 2-enoyl pyridine-N-oxides were prepared according to procedure reported previously.<sup>2</sup> All the compounds were purified by column chromatography on silica gel (60-120 mesh) using hexane - ethyl acetate mixtures as eluent. Mass analysis was carried out using ESI mass spectrometer. Optical rotations were measured using a Perkin-Elmer polarimeter. The enantiomeric excess was determined by HPLC analysis using Daicel Chiral columns. (Note - Due to high retention time of Friedel-Crafts products in chiral HPLC columns some of the samples run in Chiralpak AD-H column with dimension, 15cm x 0.46 x 5 $\mu\text{m}$ ) Absolute stereochemistry was determined by comparing optical rotation of compounds with literature values. = Unknown compounds absolute configuration determined by analogy.

- 
- 1) (a) M. Irmak, A. Groschner, M. M. K. Boysen, *Chem. Commun.* 2007, 177; (b) T. Minuth, M. Irmak, A. Groschner, T. Lehnert, M. M. K. Boysen, *Eur. J. Org. Chem.* 2009, 997.  
2) (a) S. Barroso, G. Blay, J. R. Pedro, *Org. Lett.* 2007, **9**, 1983. (b) P. K. Singh, V. K. Singh, *Org. Lett.* 2008, **10**, 4121.

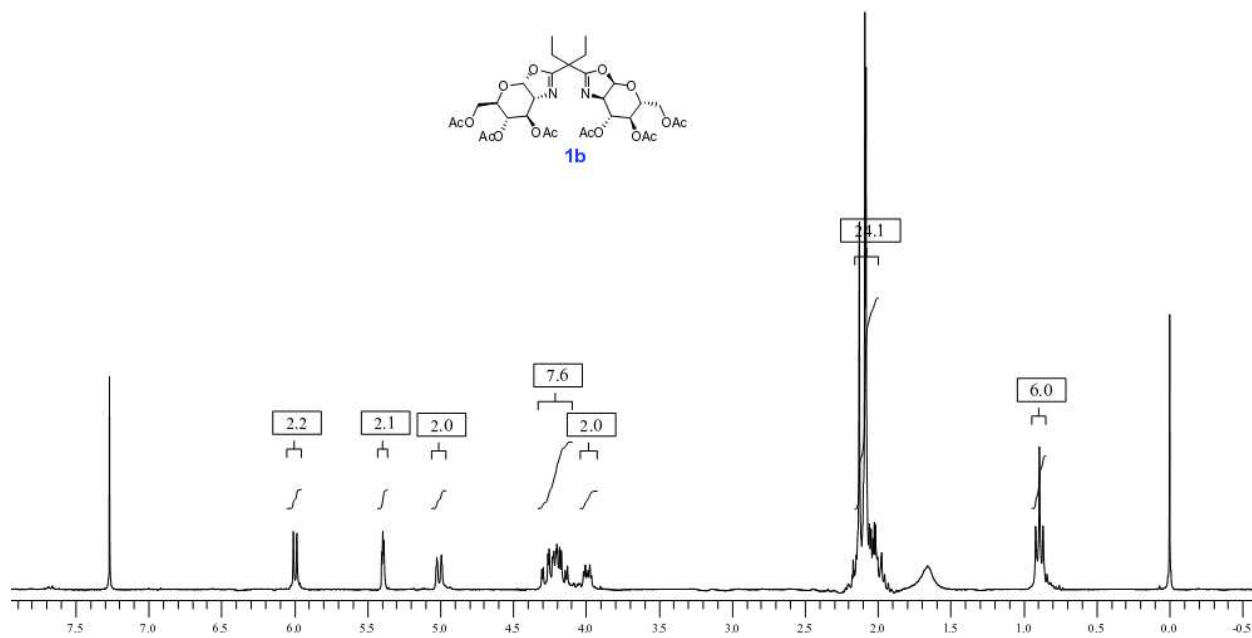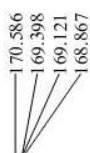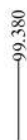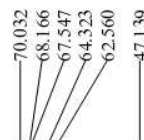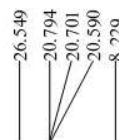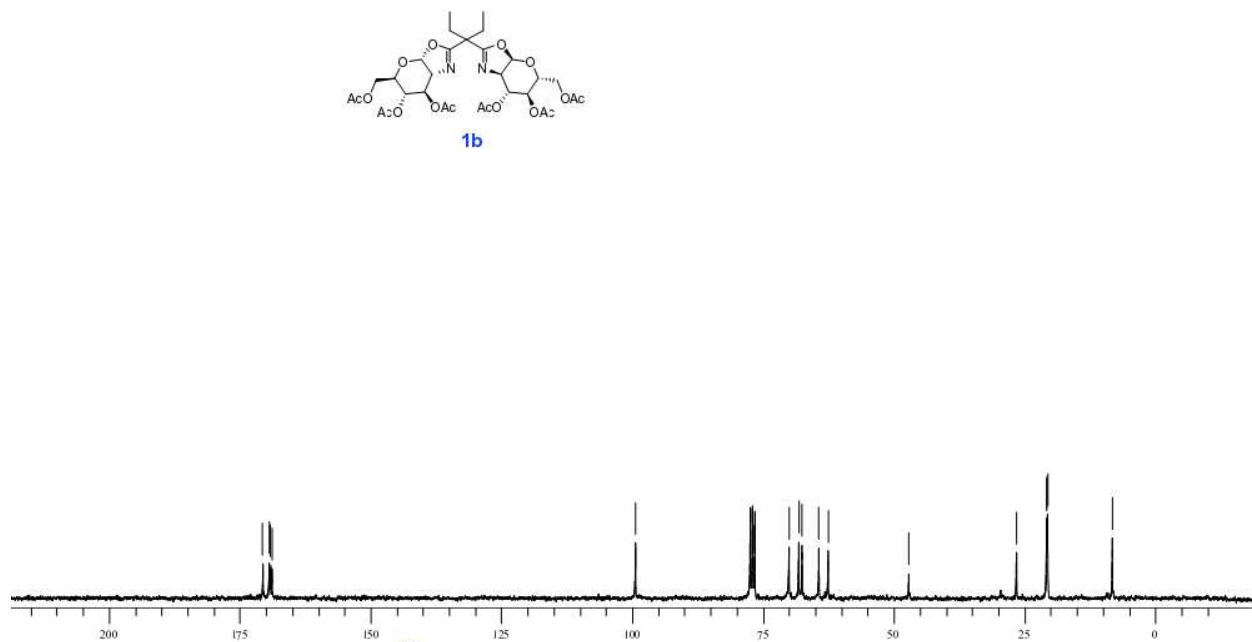

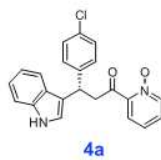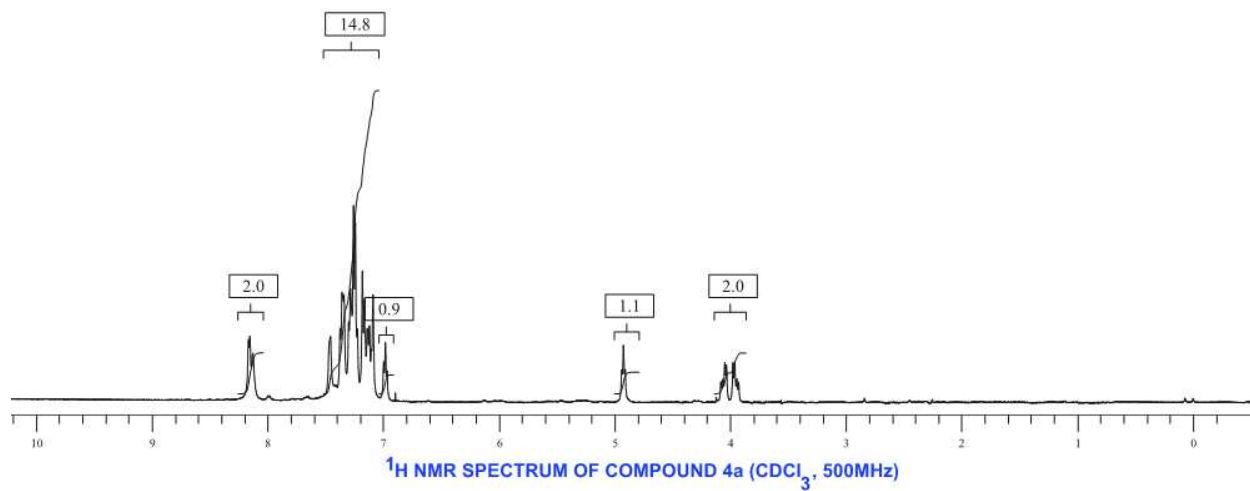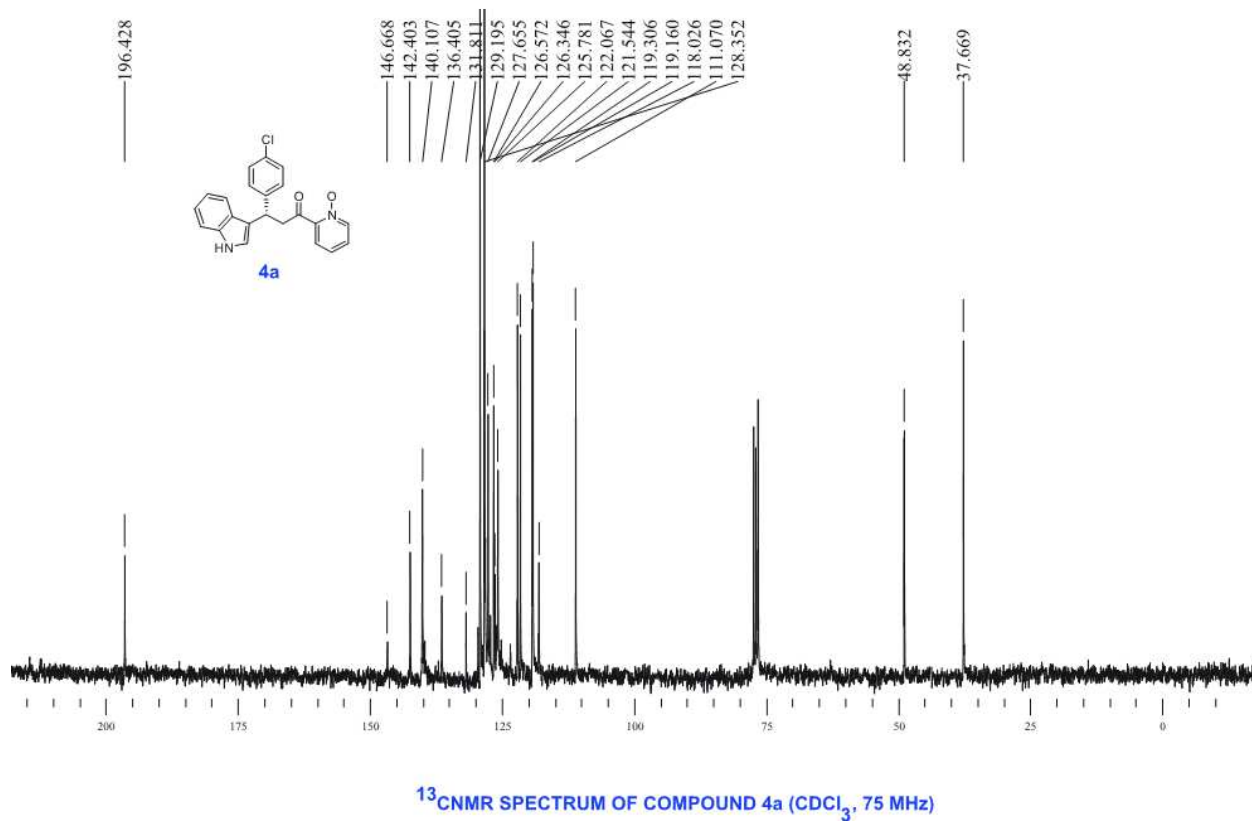

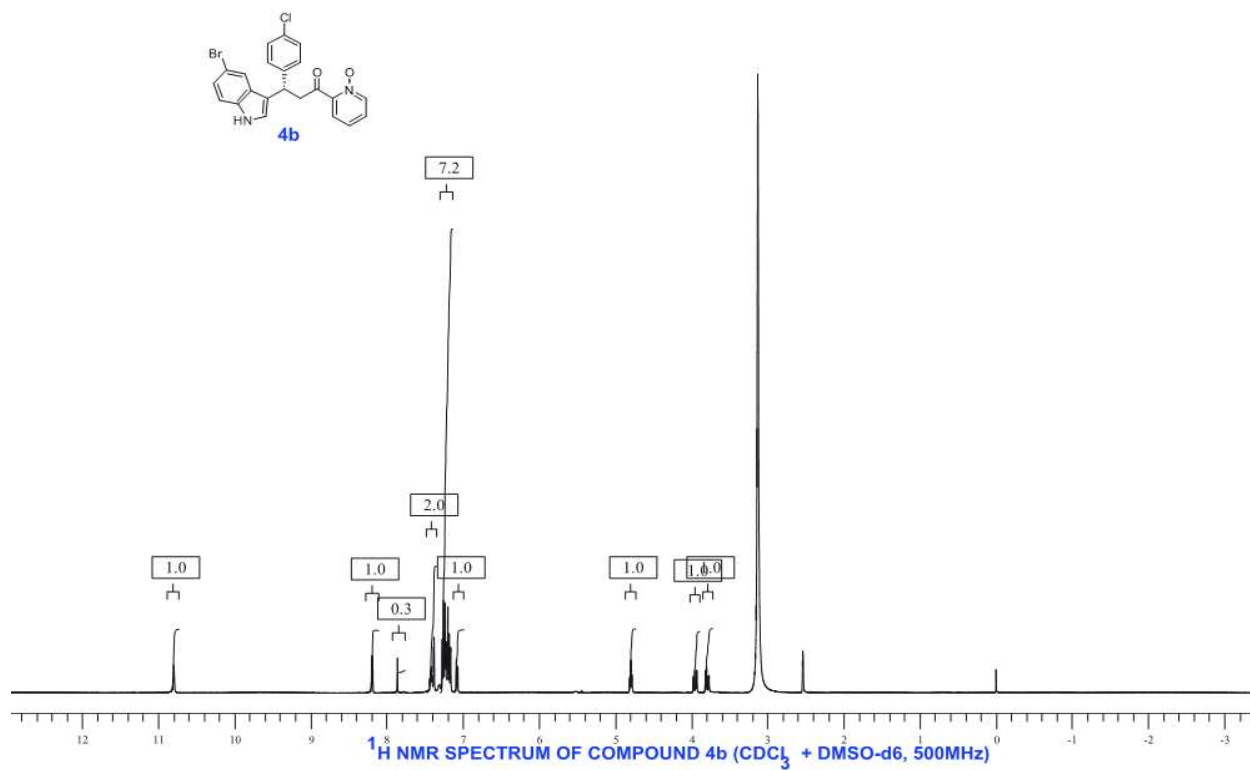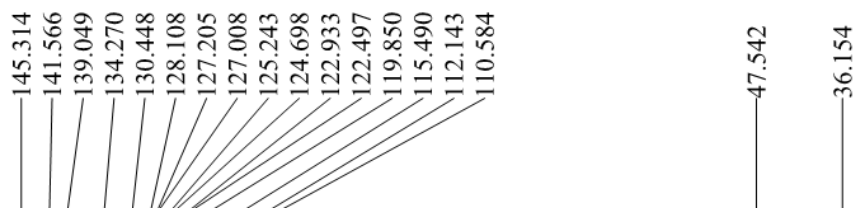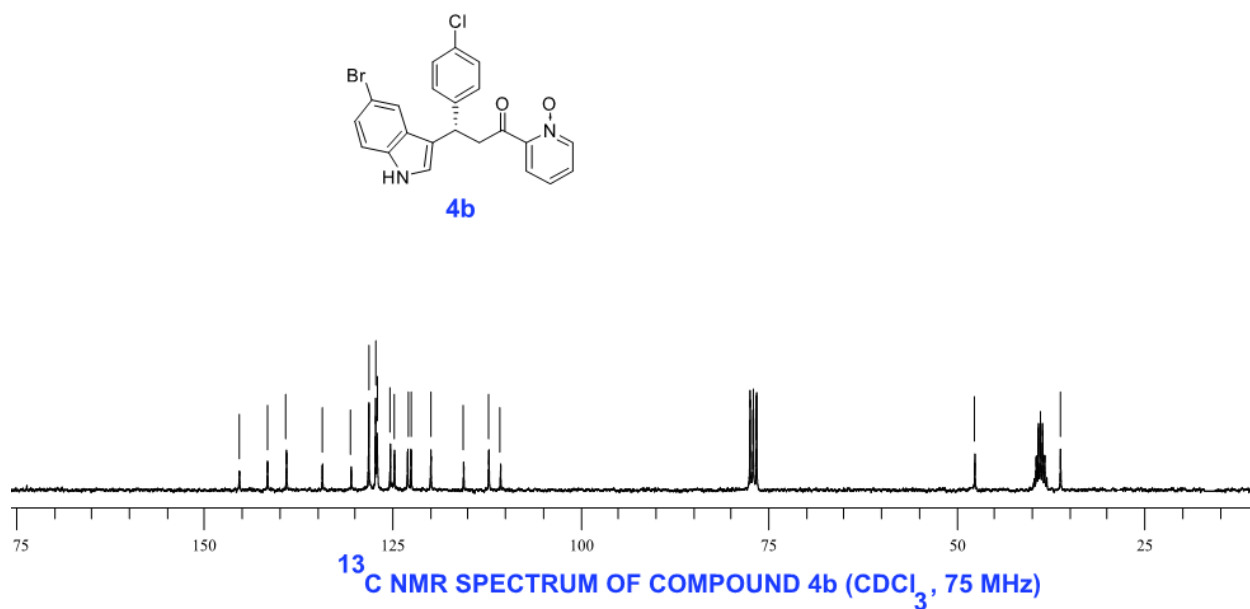

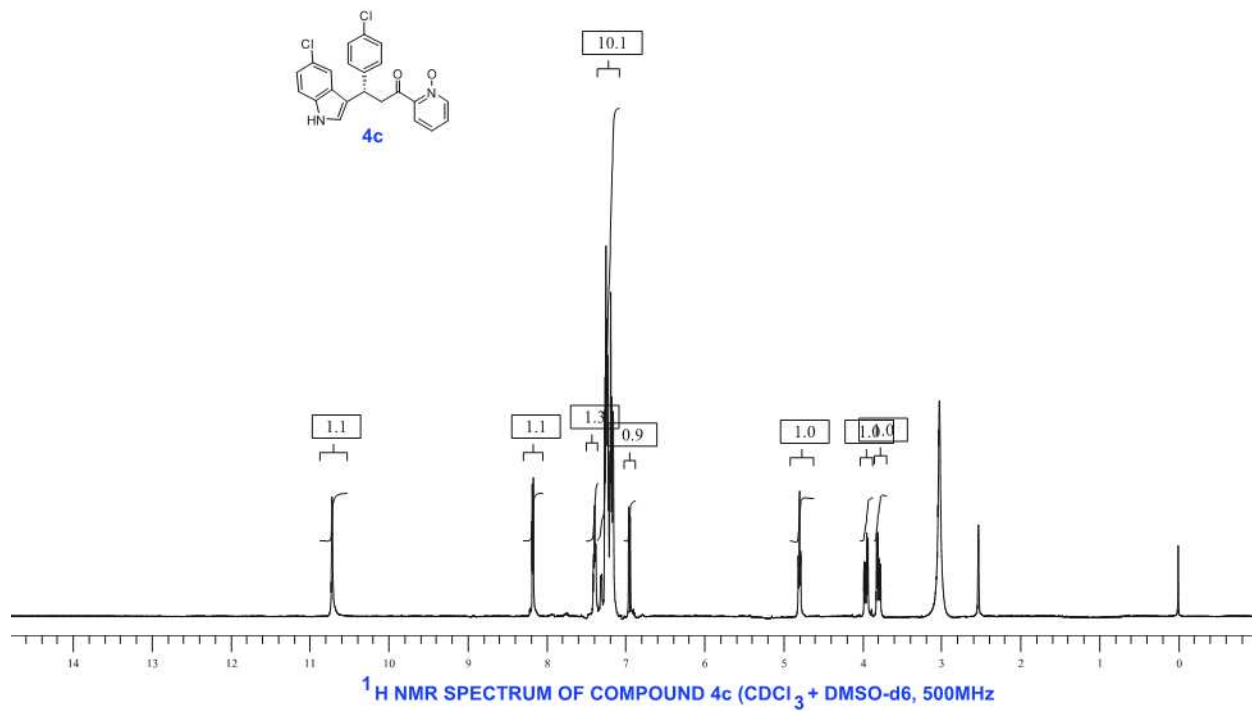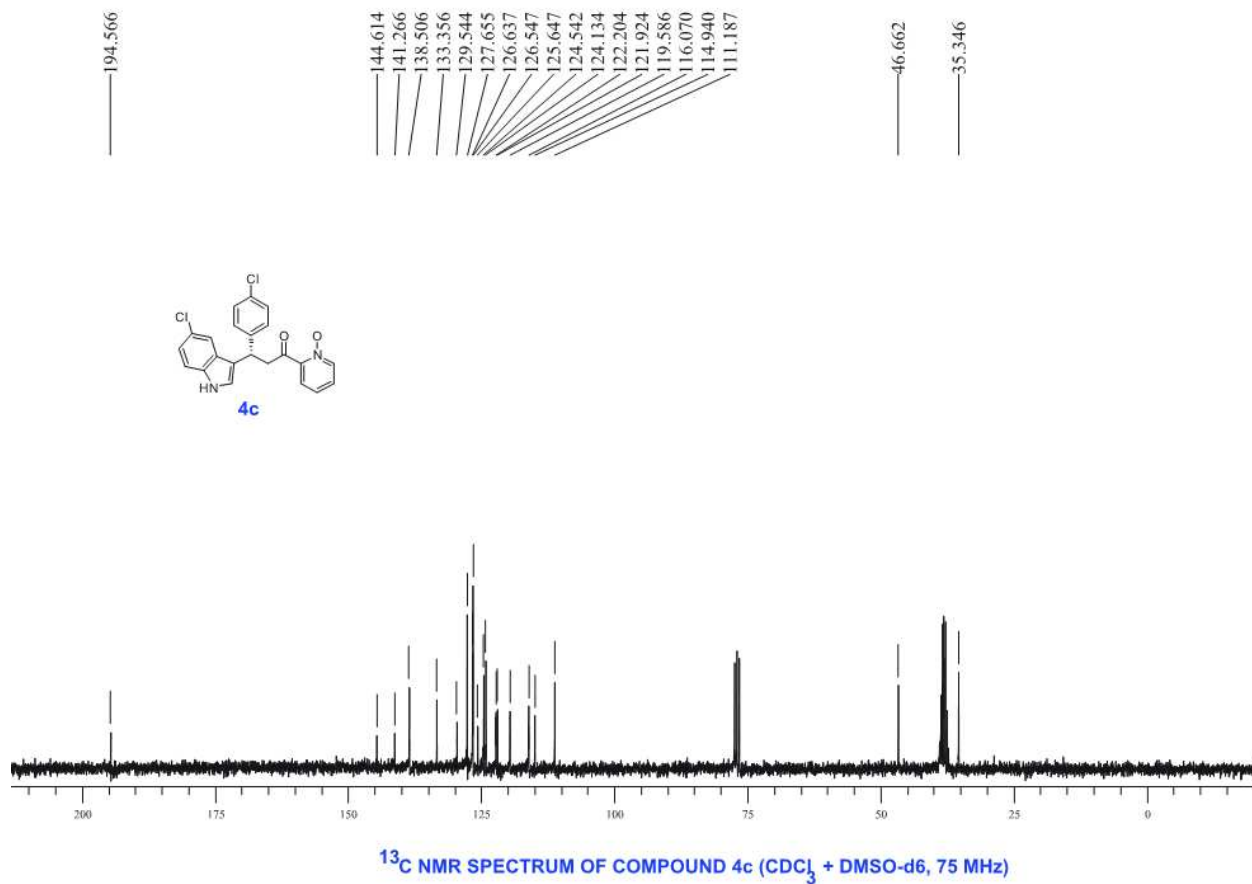

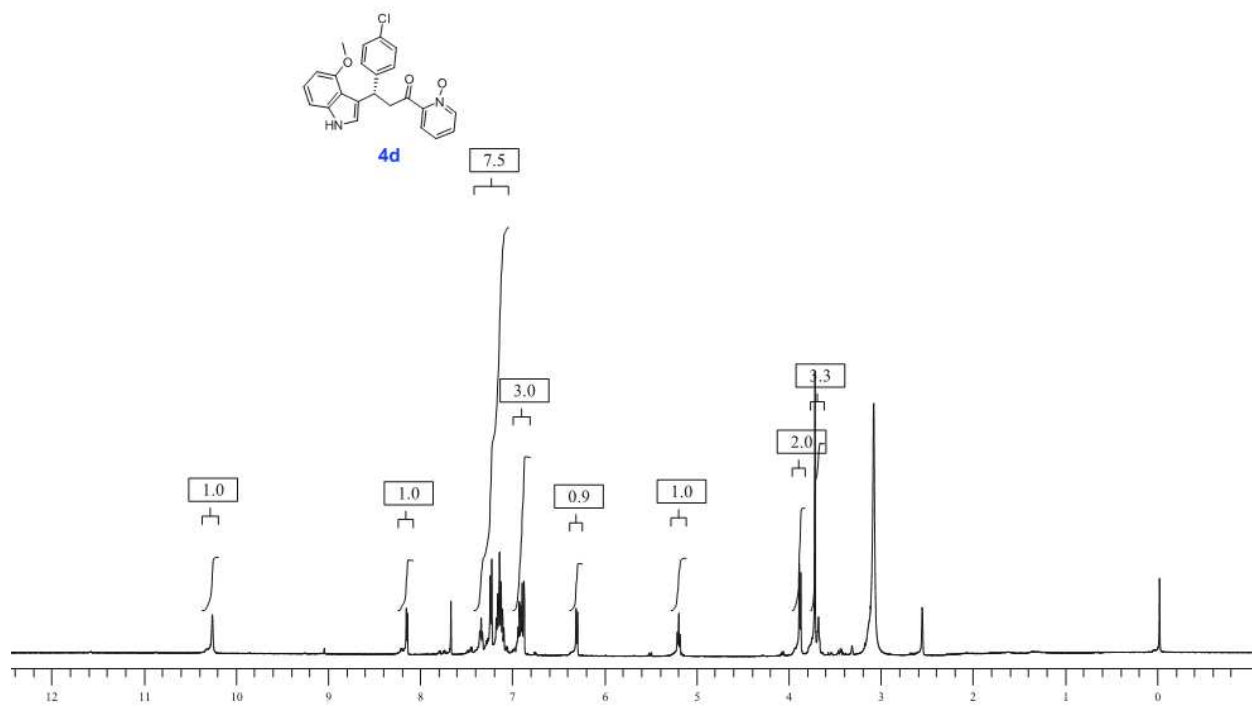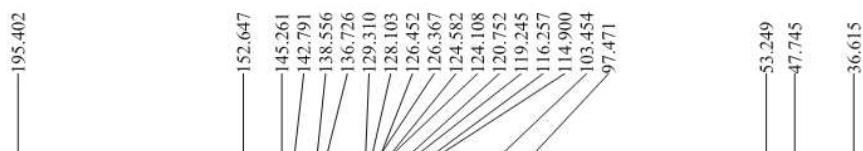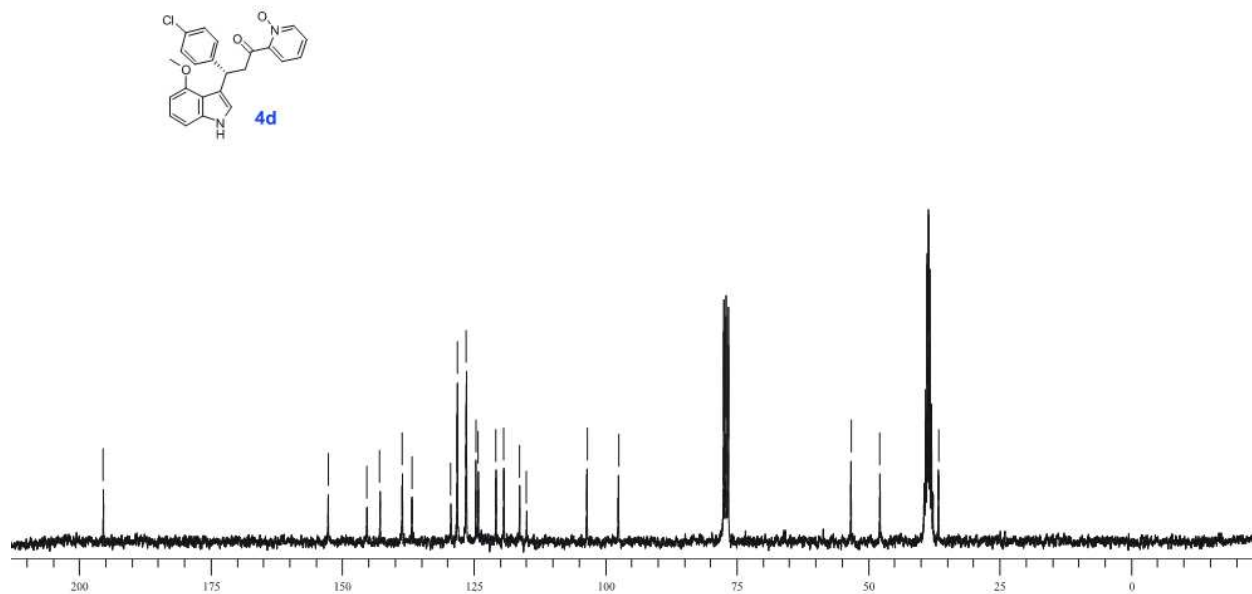

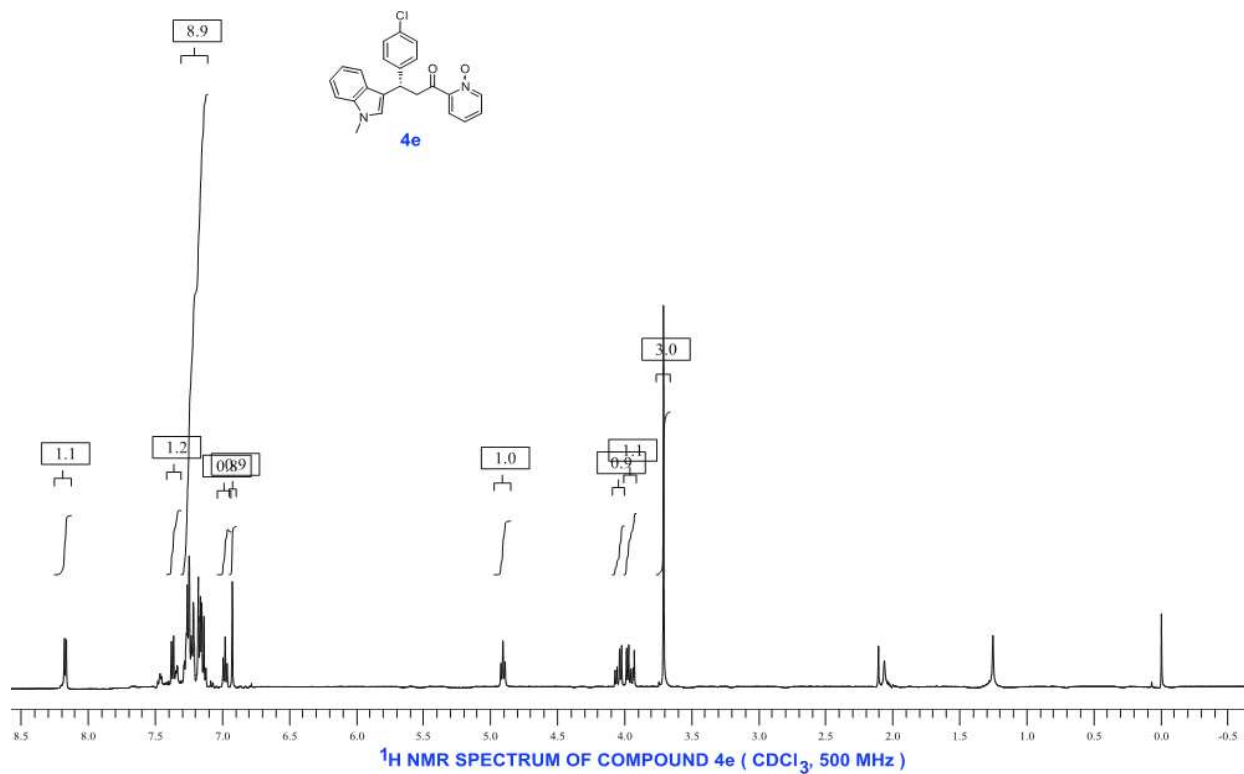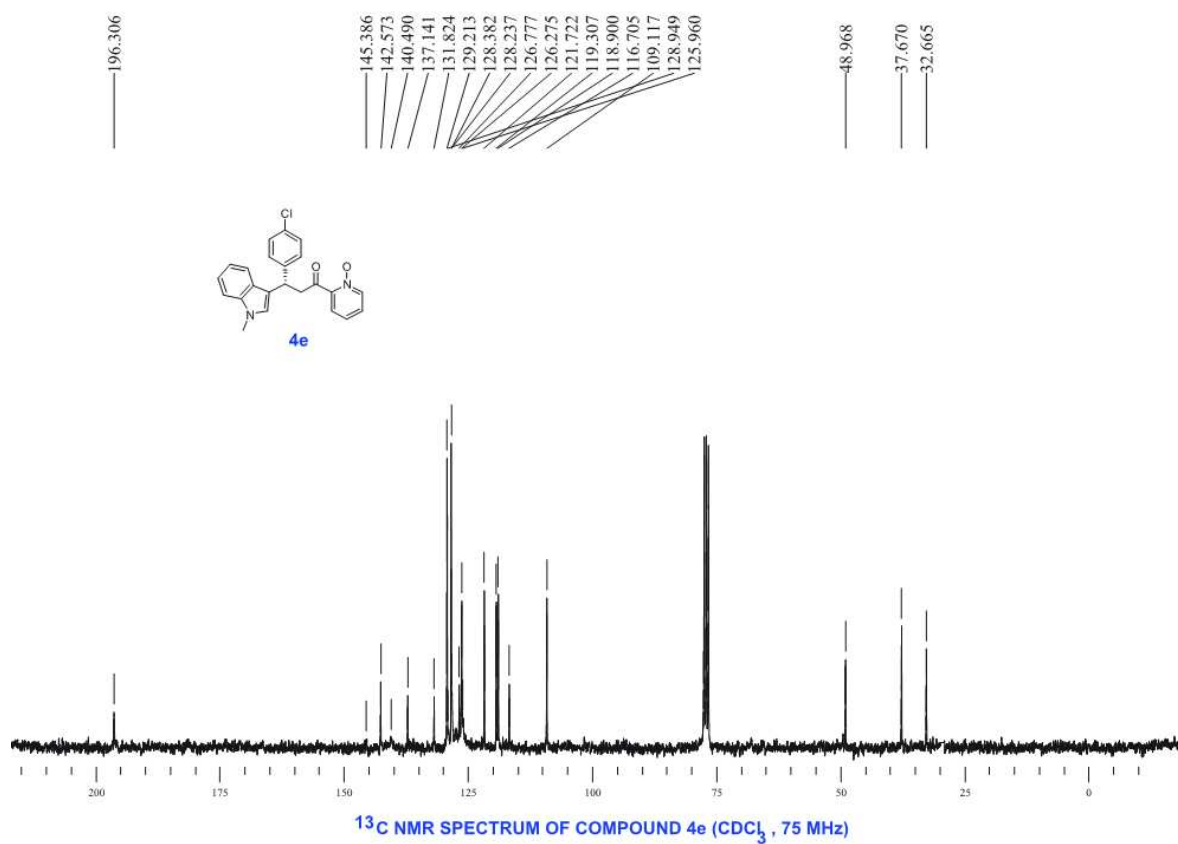



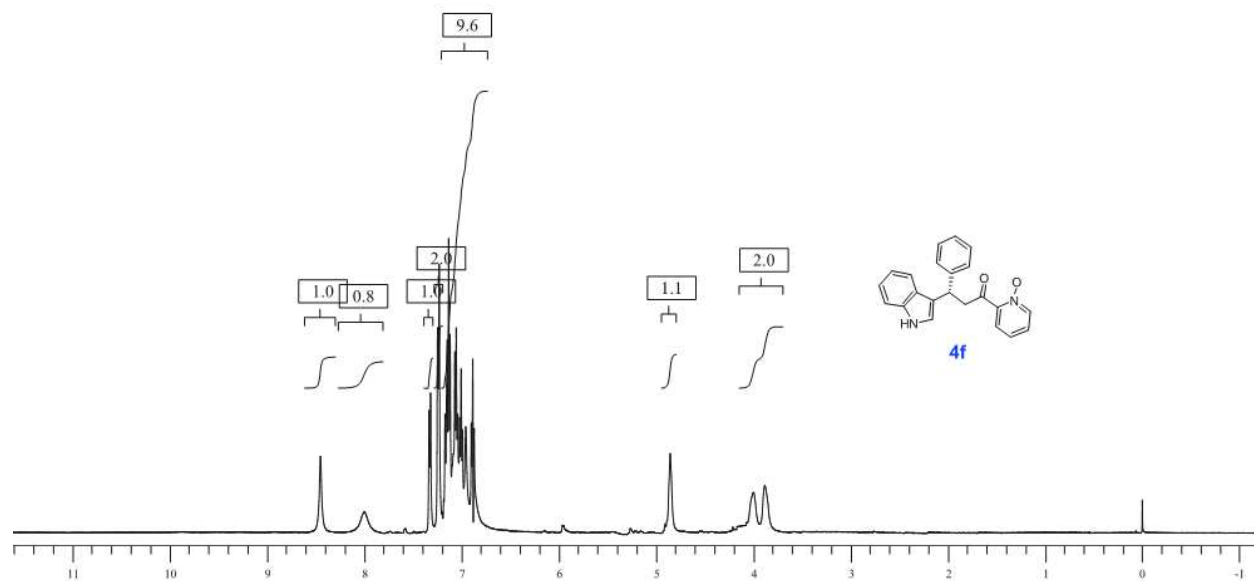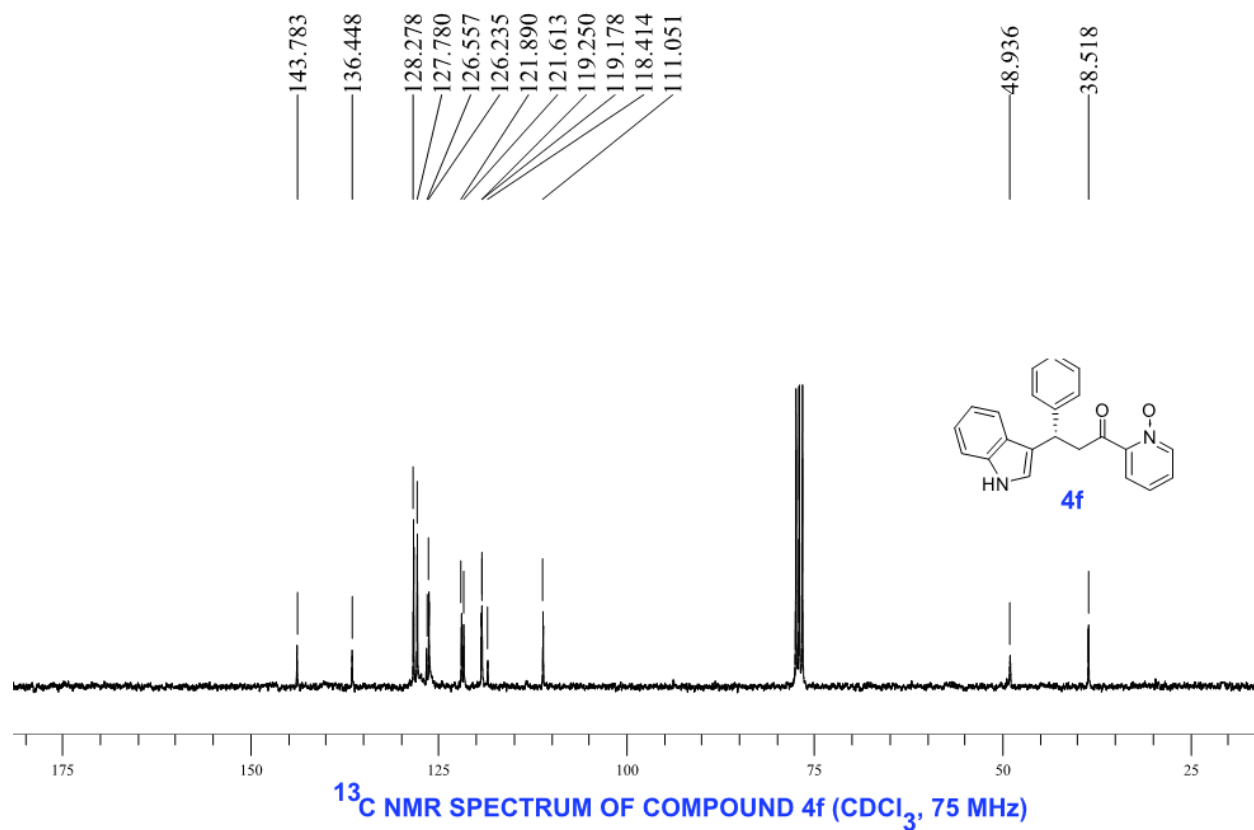

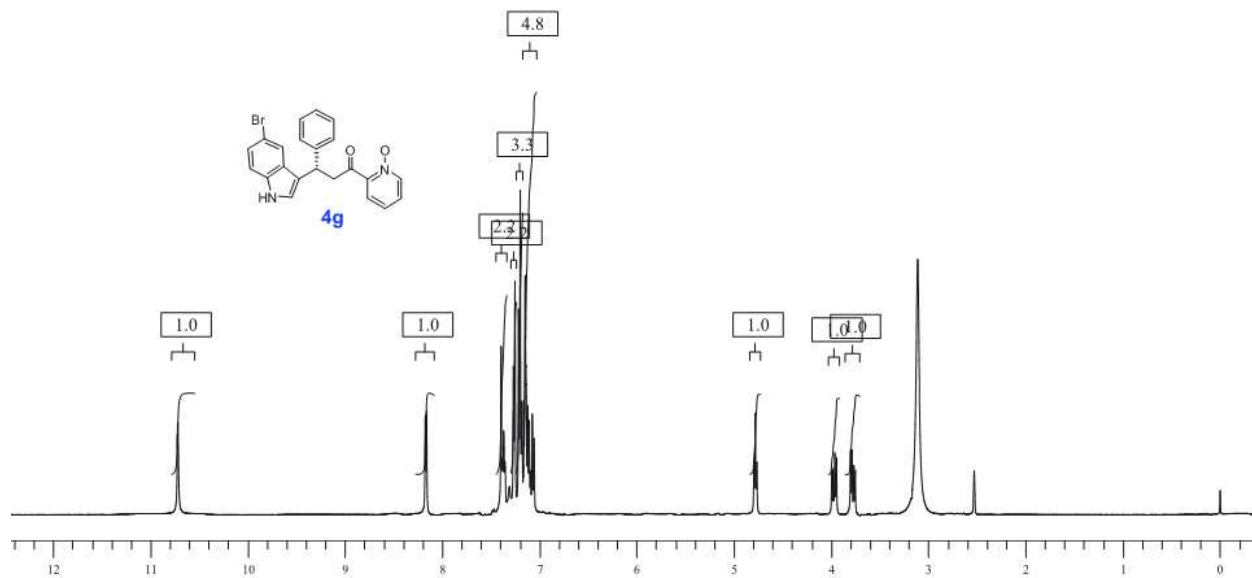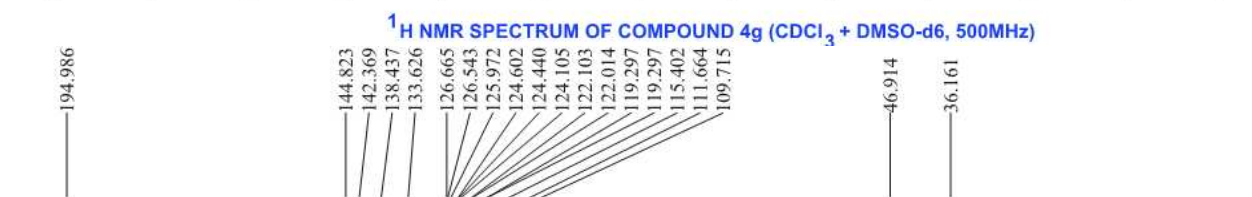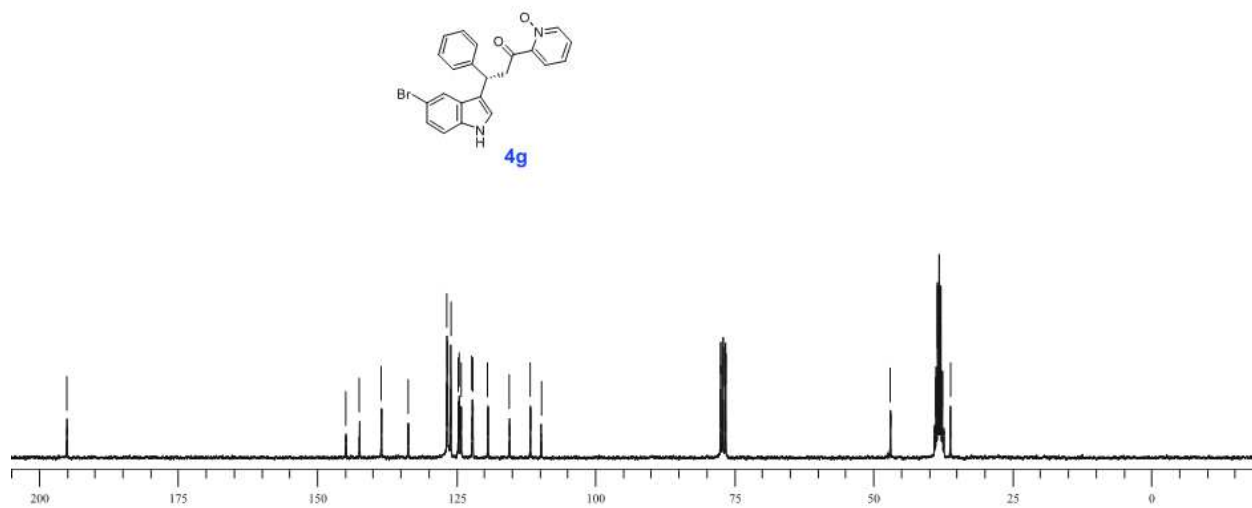

**<sup>13</sup>C NMR SPECTRUM OF COMPOUND 4g (CDCl<sub>3</sub> + DMSO-d<sub>6</sub>, 75 MHz)**

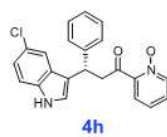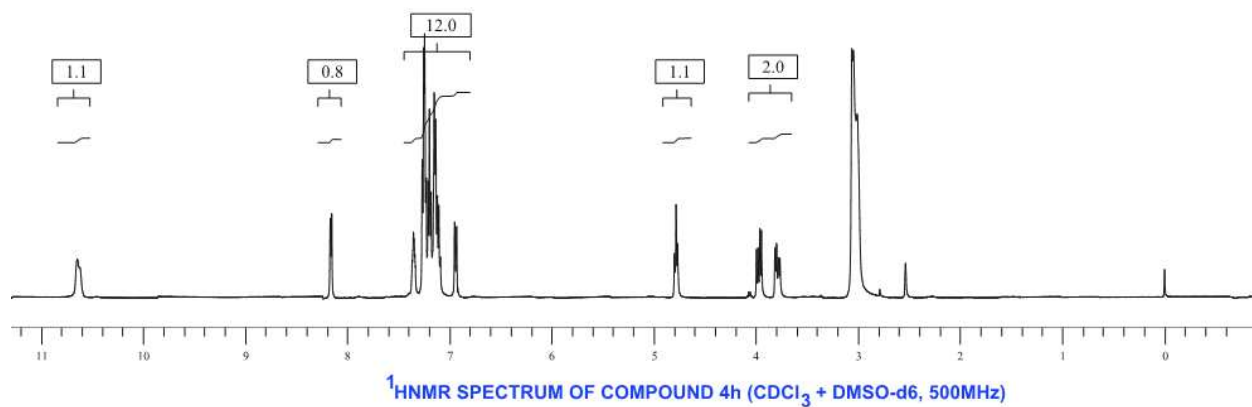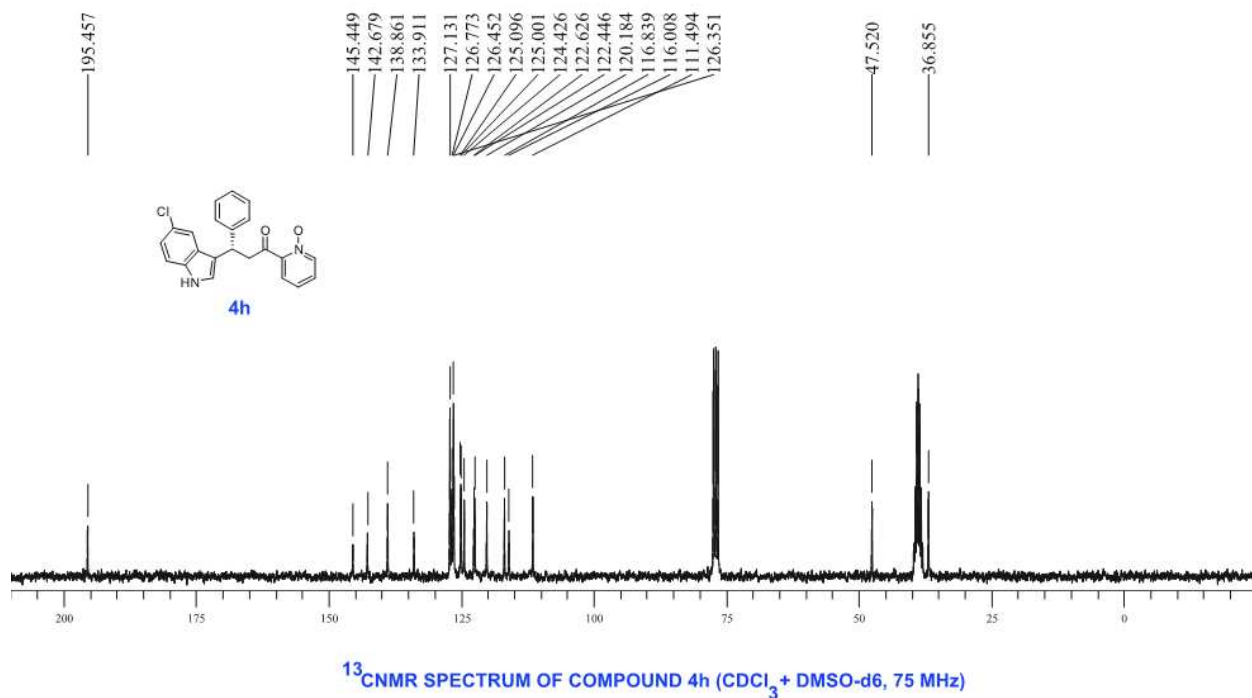

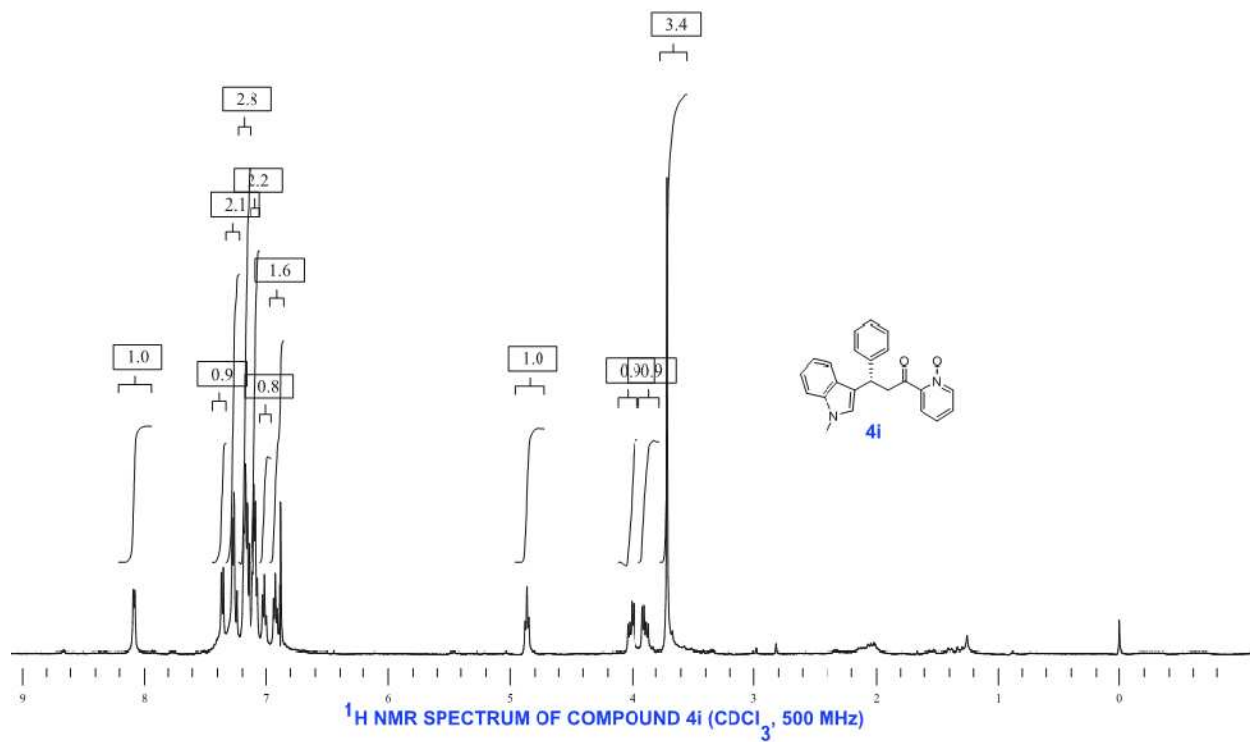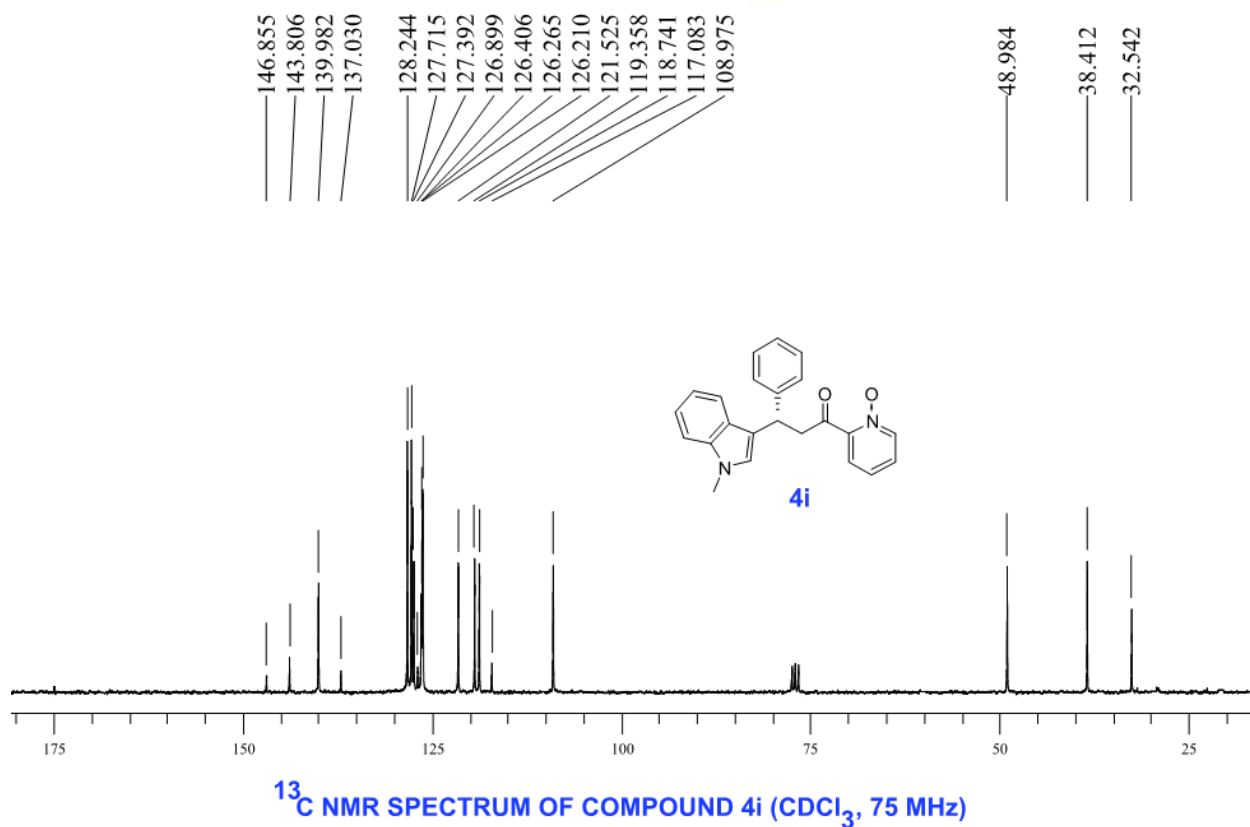

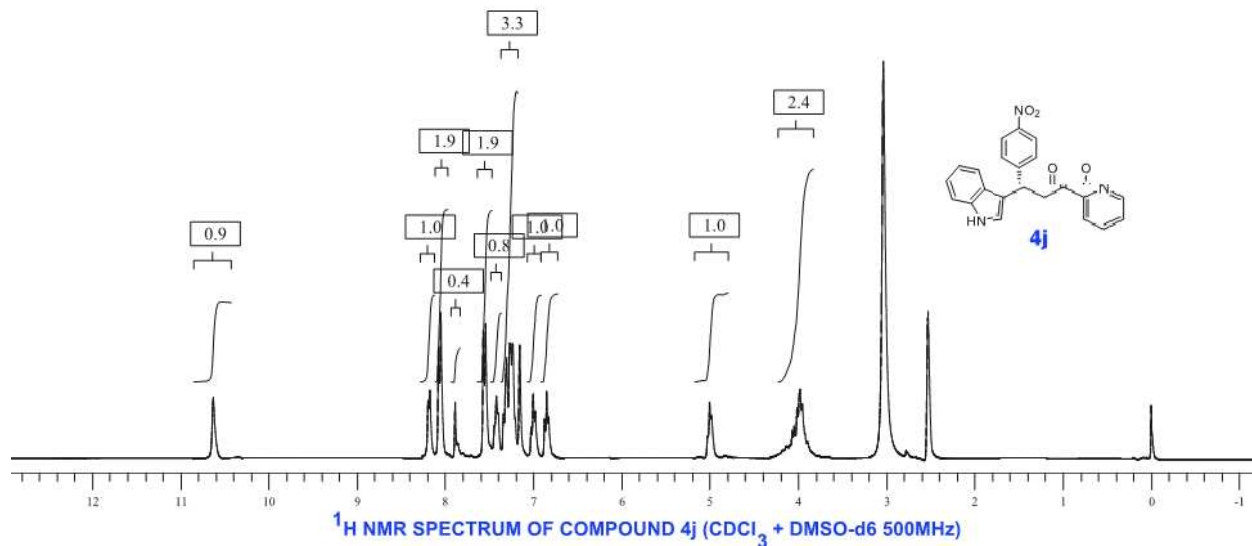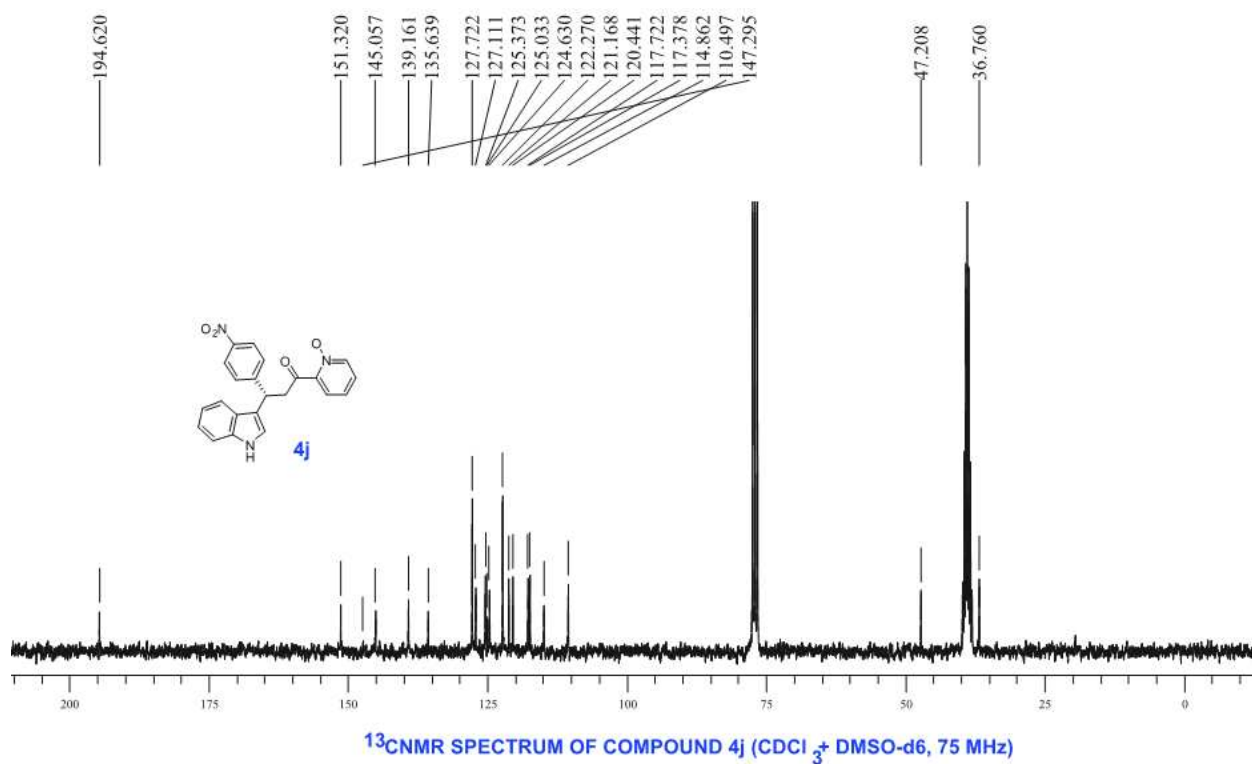

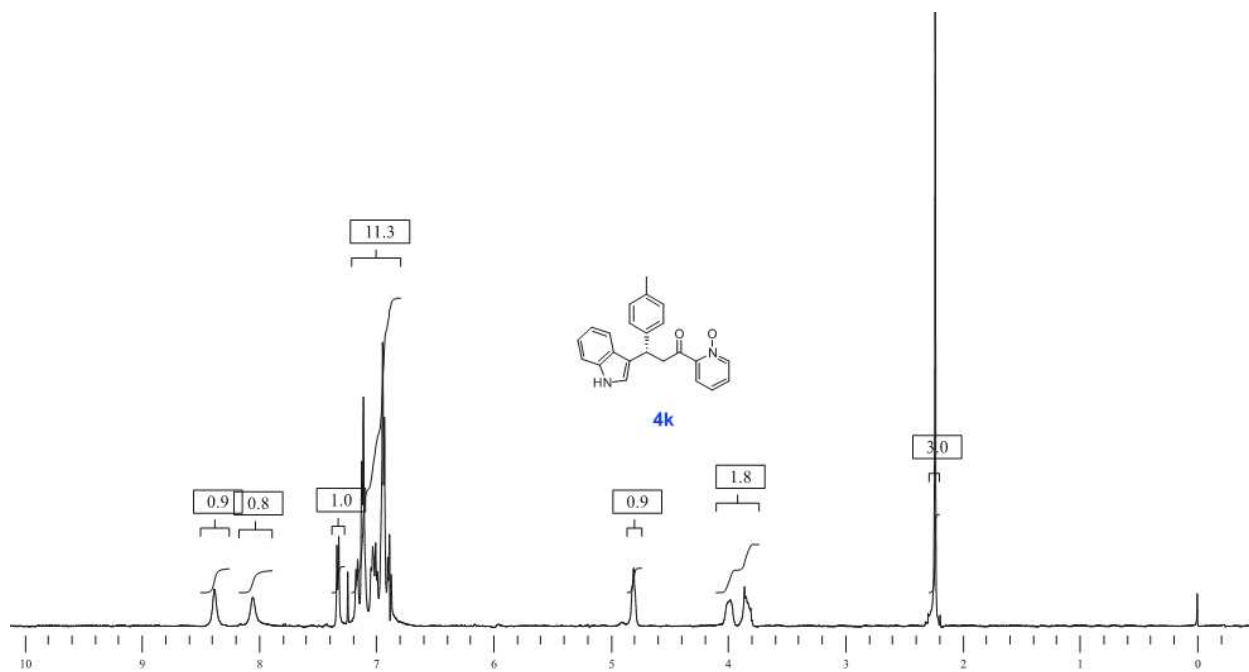

<sup>1</sup>H NMR SPECTRUM OF COMPOUND 4k (CDCl<sub>3</sub>, 500 MHz)

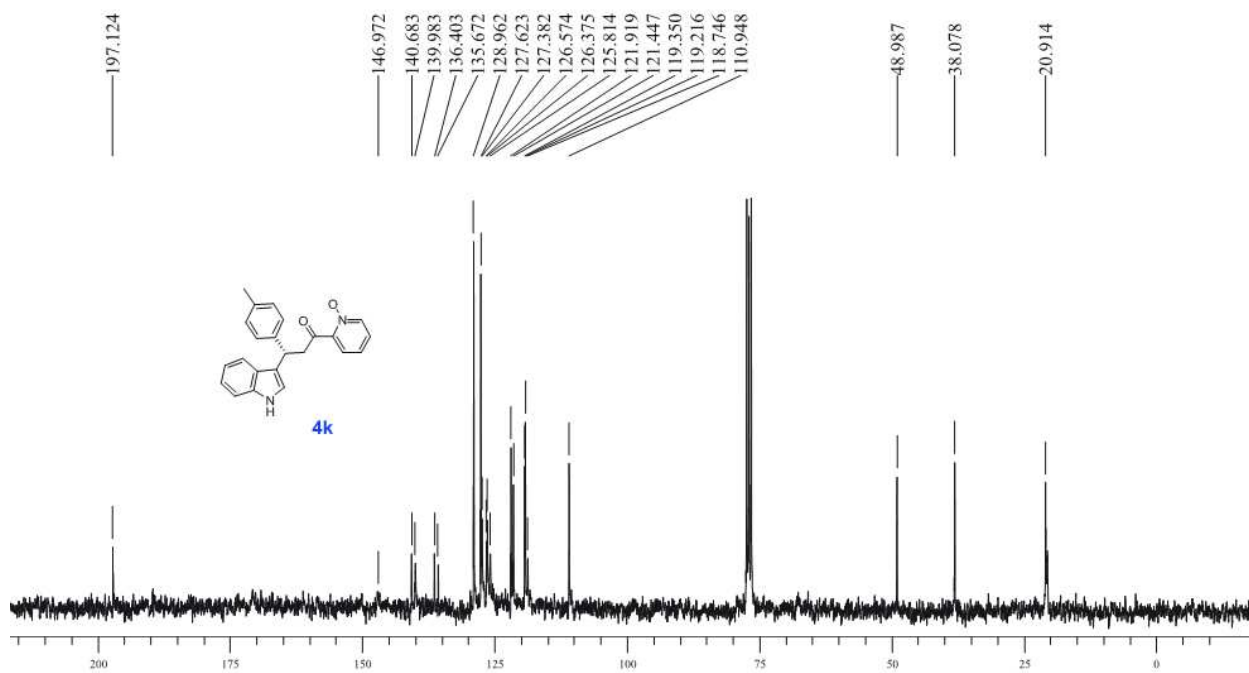

<sup>13</sup>C NMR SPECTRUM OF COMPOUND 4k (CDCl<sub>3</sub>, 75 MHz)

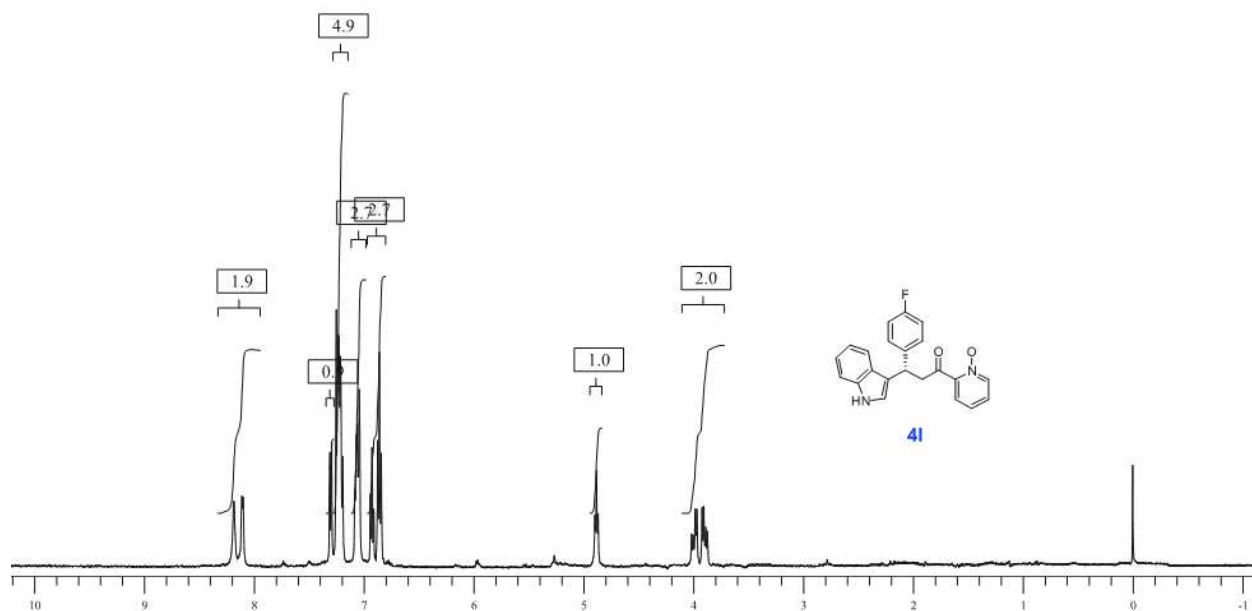

<sup>1</sup>H NMR SPECTRUM OF COMPOUND 4i (CDCl<sub>3</sub>, 500MHz)

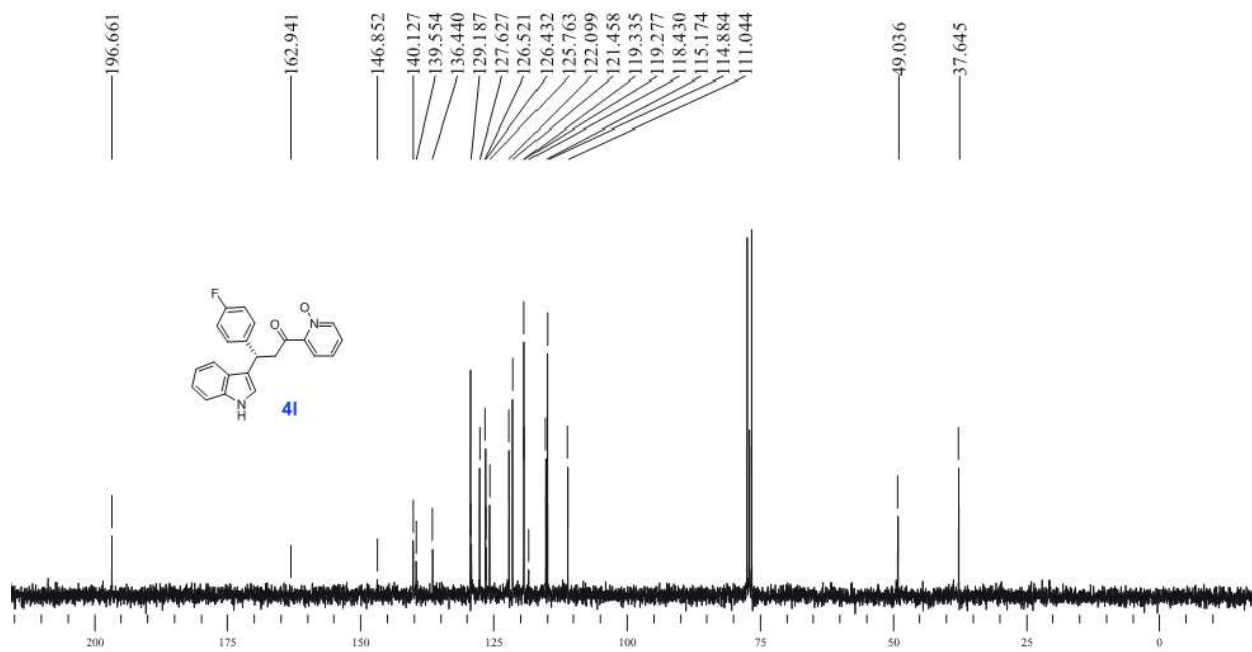

<sup>13</sup>C NMR SPECTRUM OF COMPOUND 4i (CDCl<sub>3</sub>, 75 MHz)

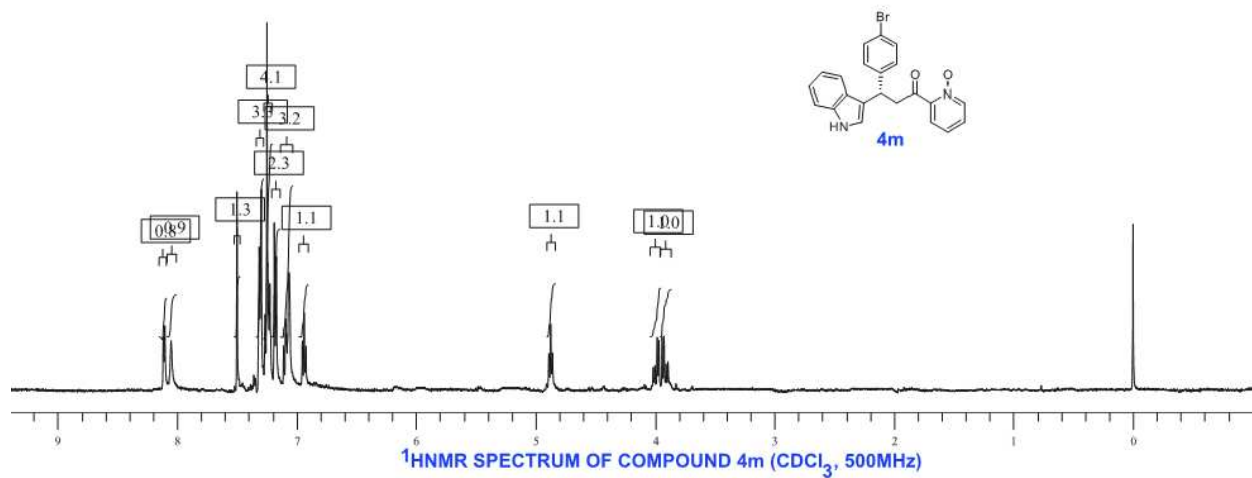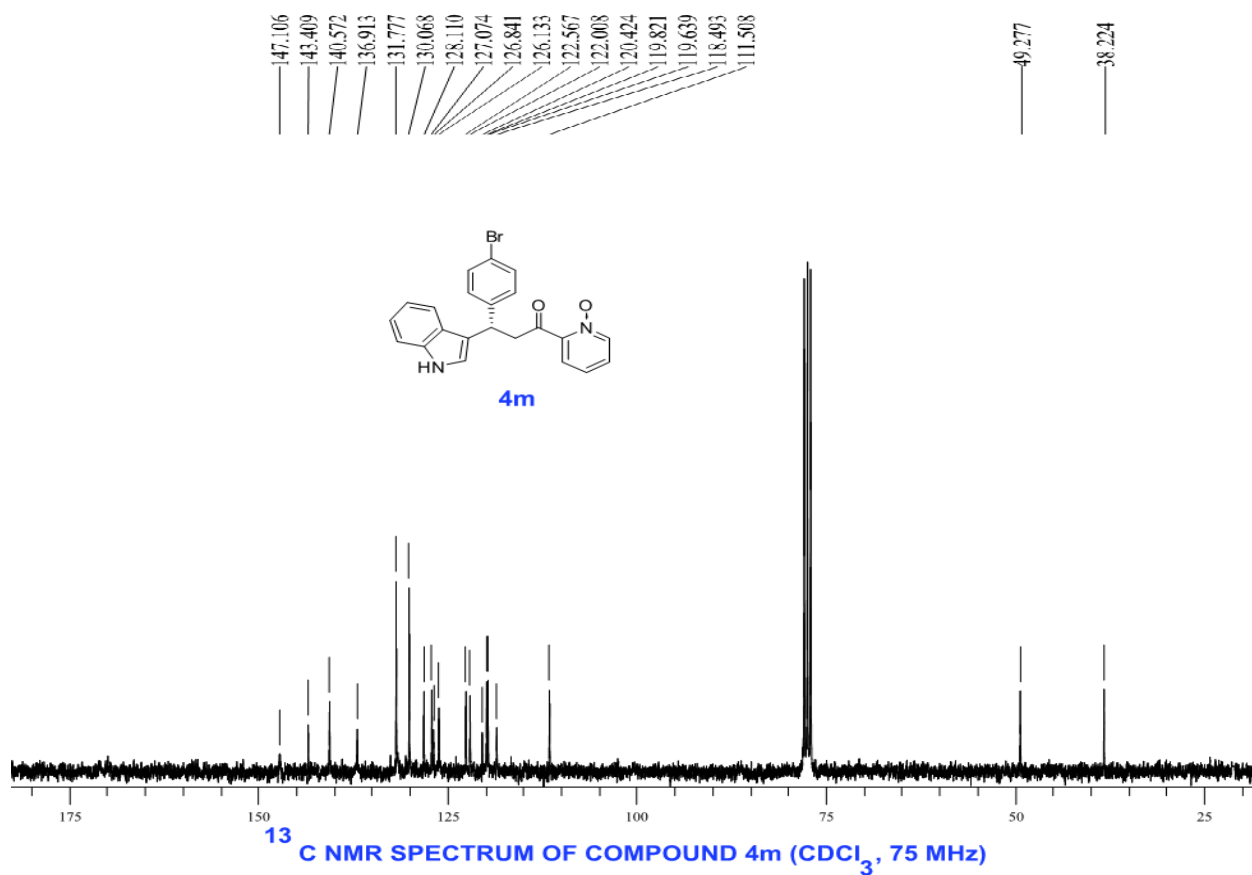



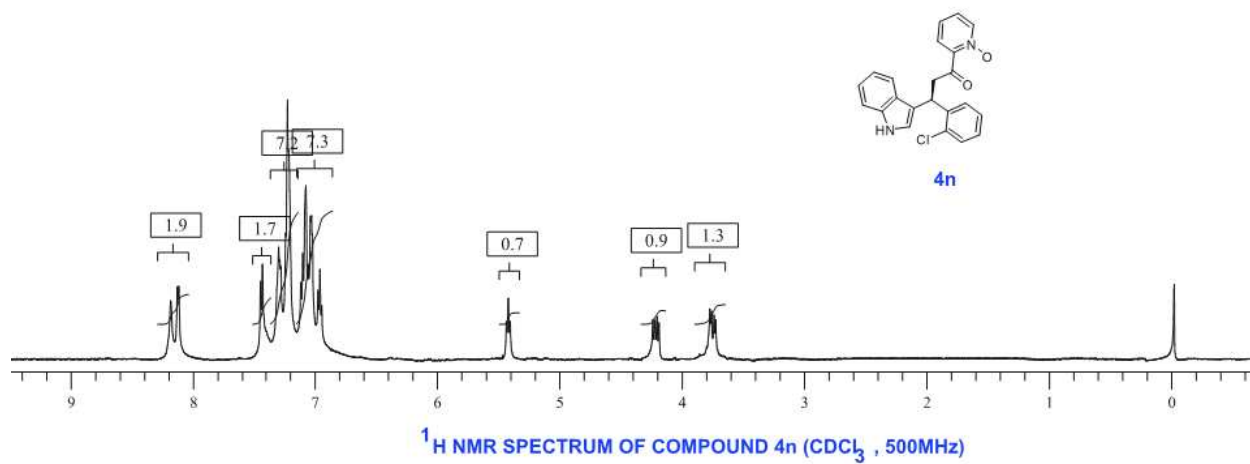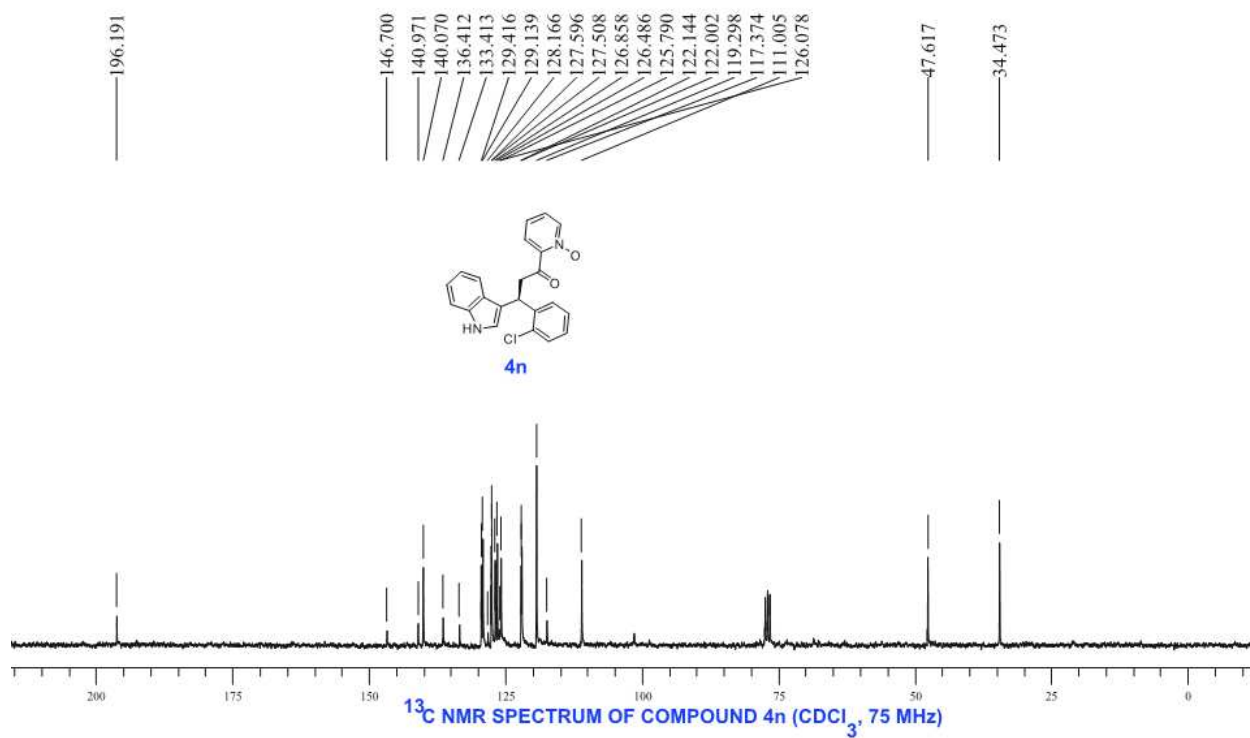

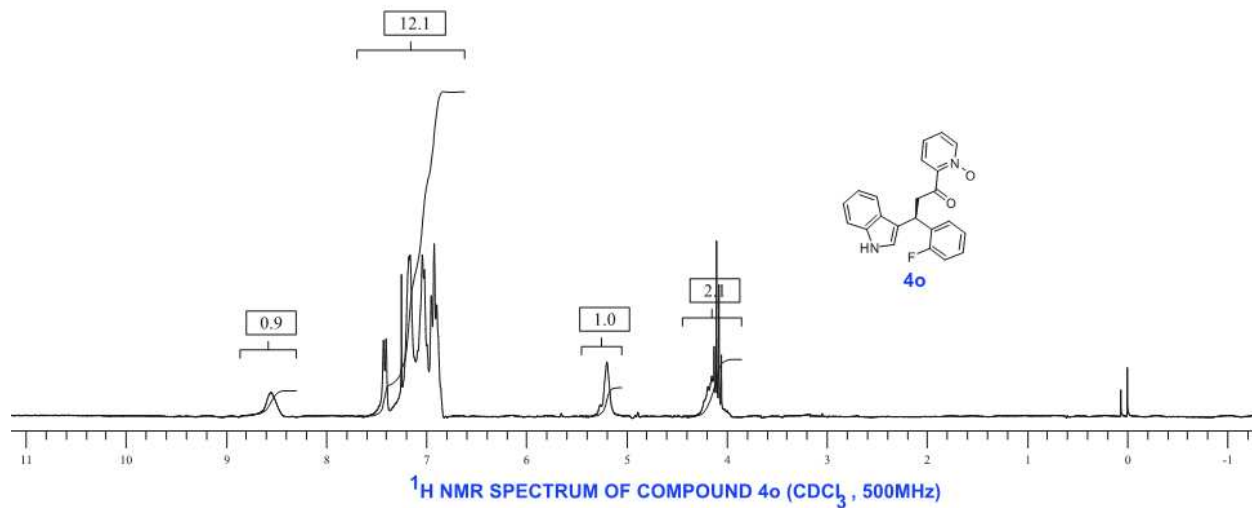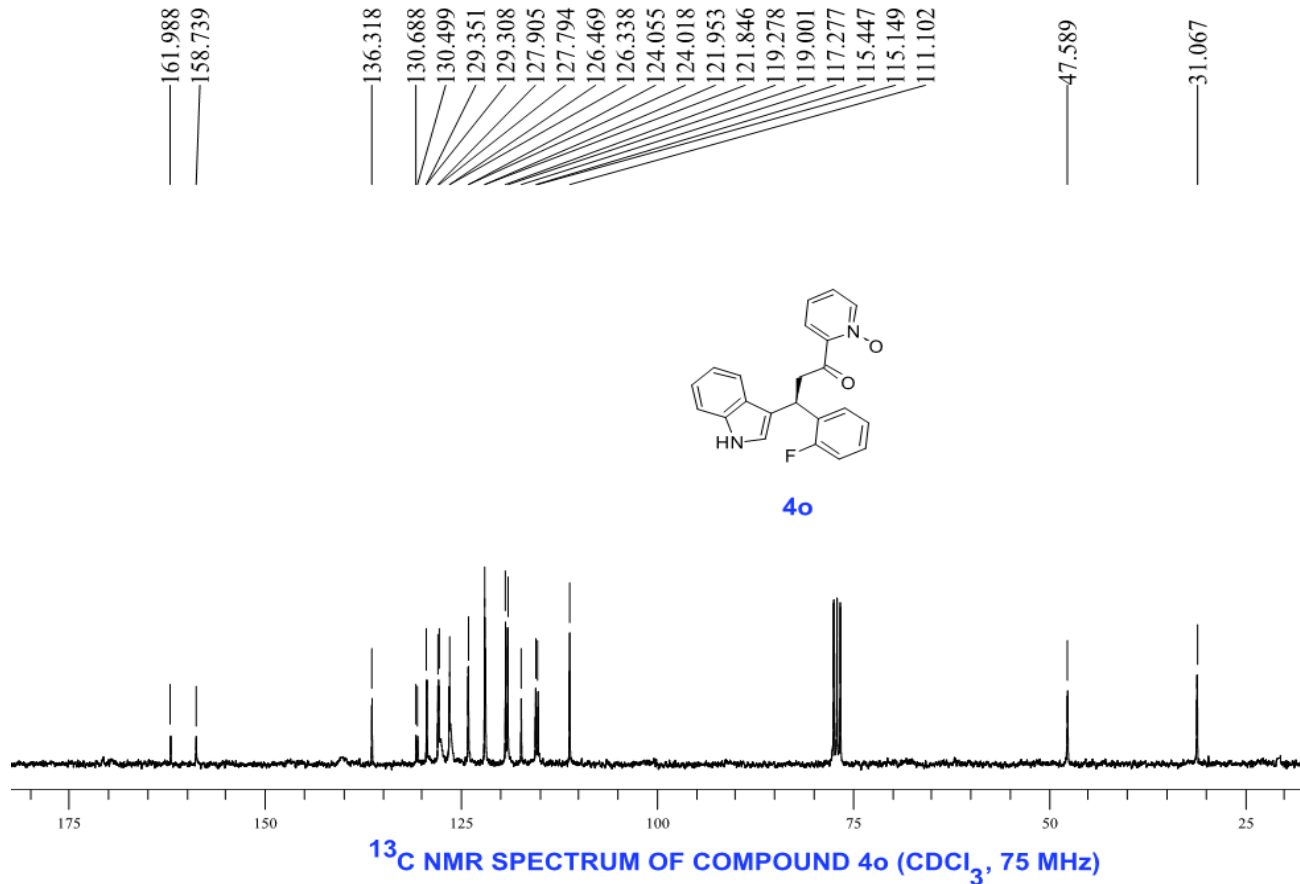

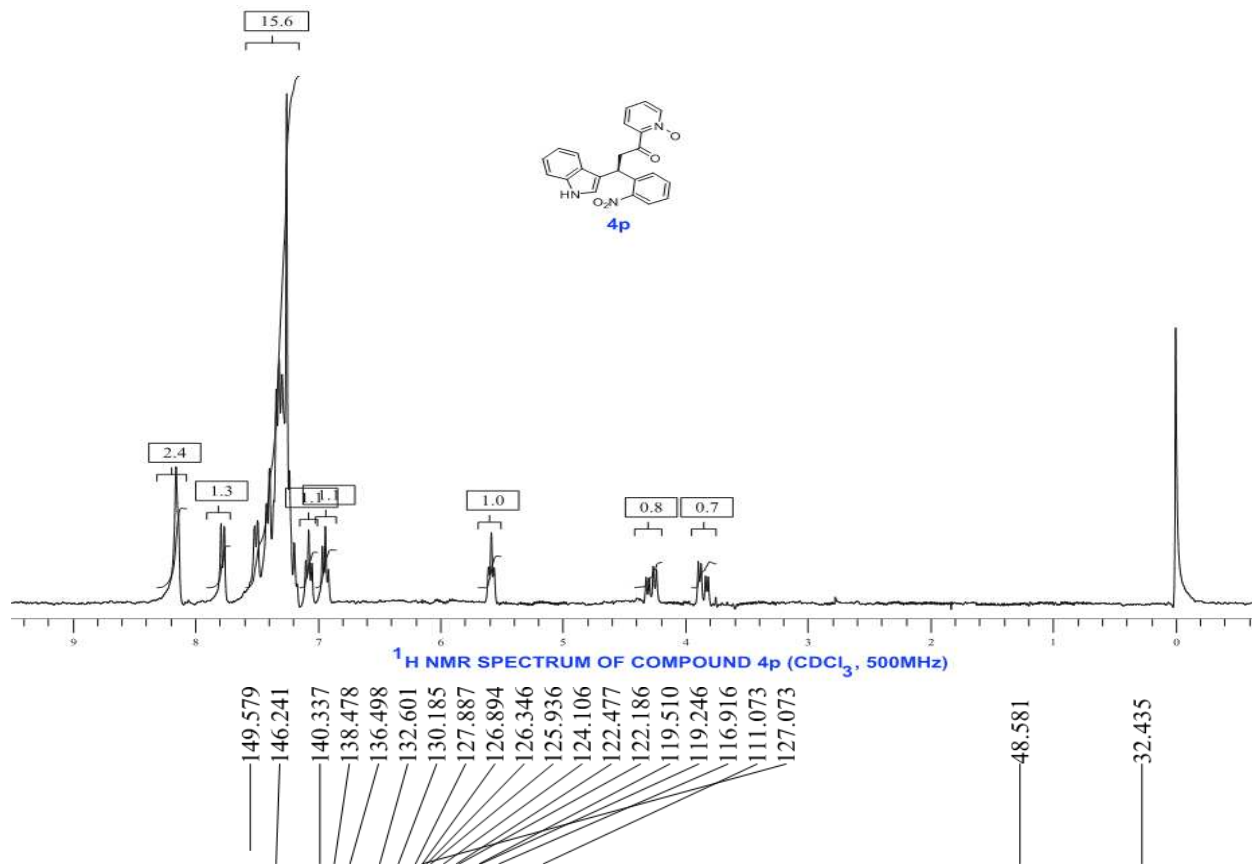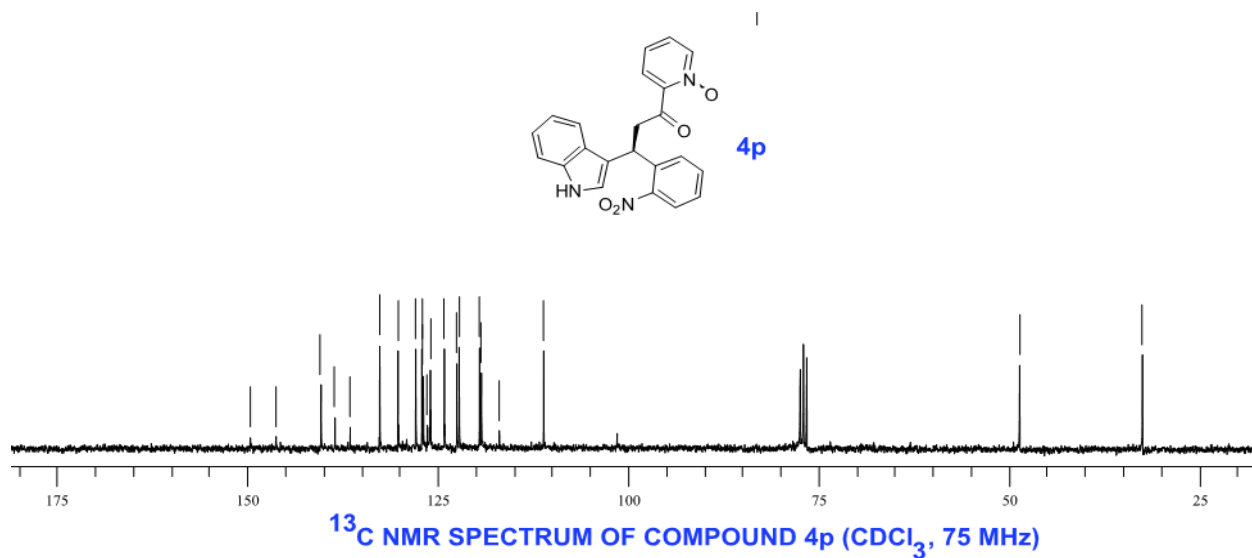

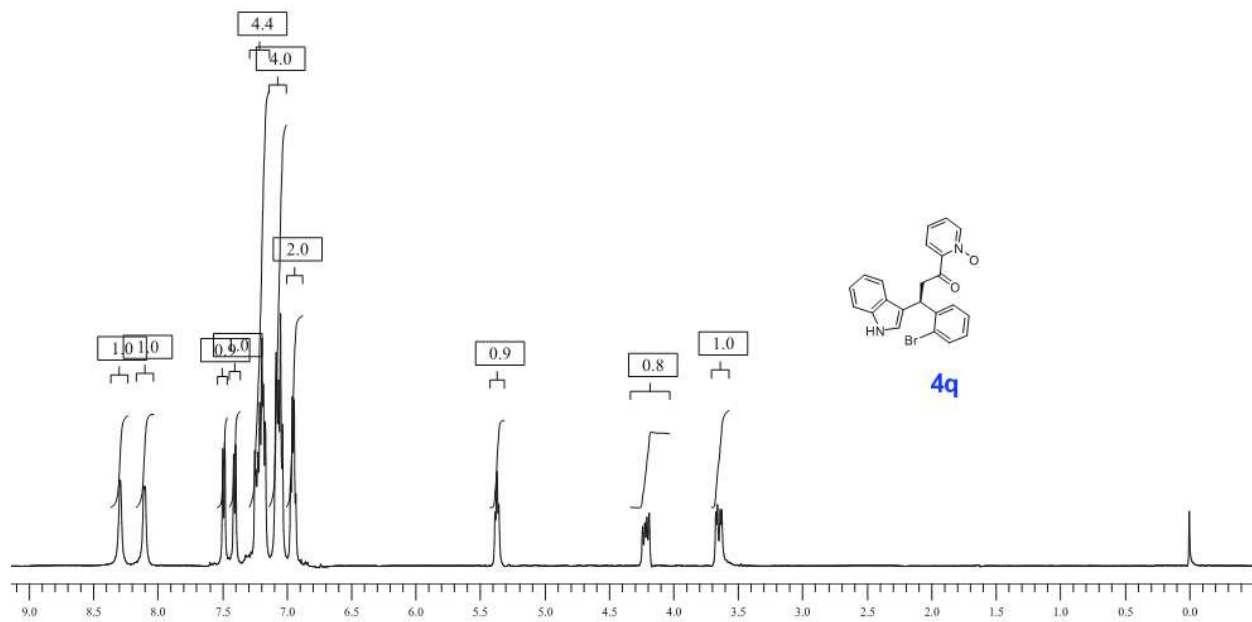

**1H NMR SPECTRUM OF COMPOUND 4q (CDCl<sub>3</sub>, 500MHz)**

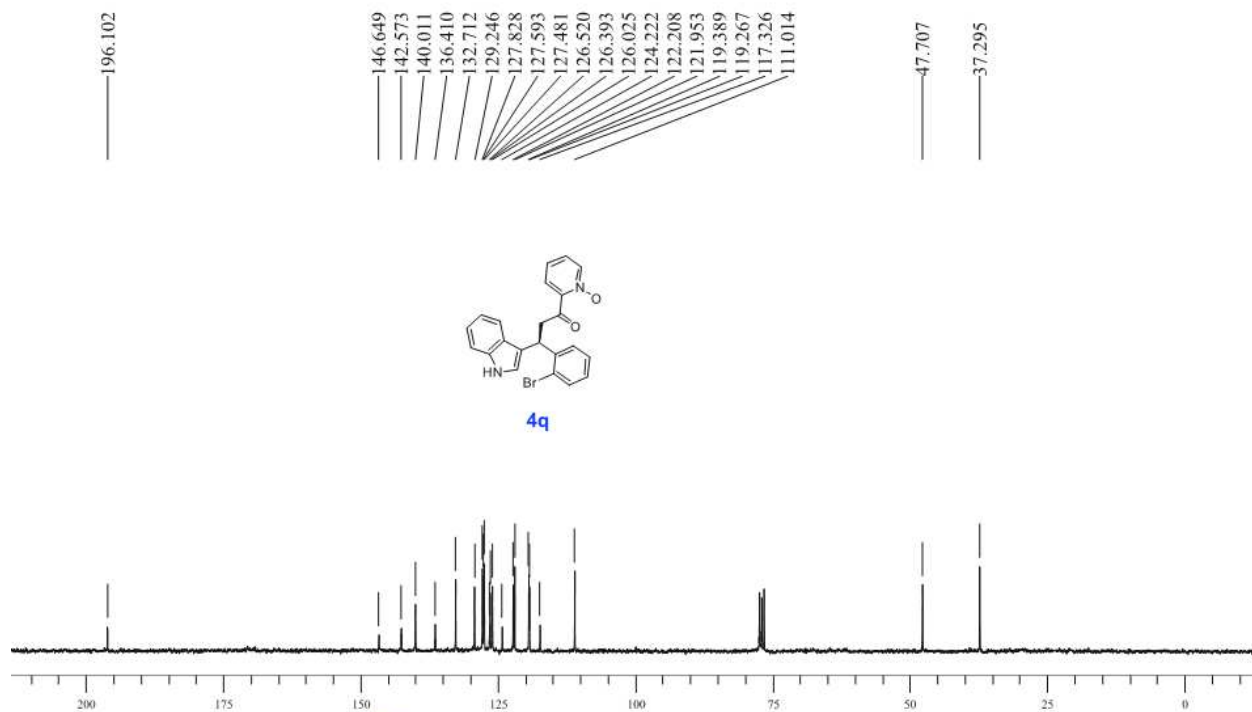

**13C NMR SPECTRUM OF COMPOUND 4q (CDCl<sub>3</sub>, 75 MHz)**

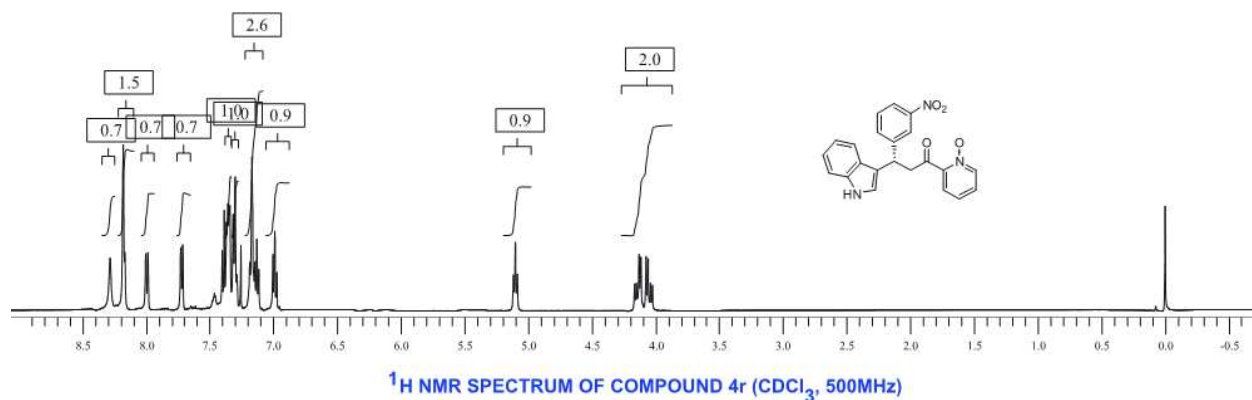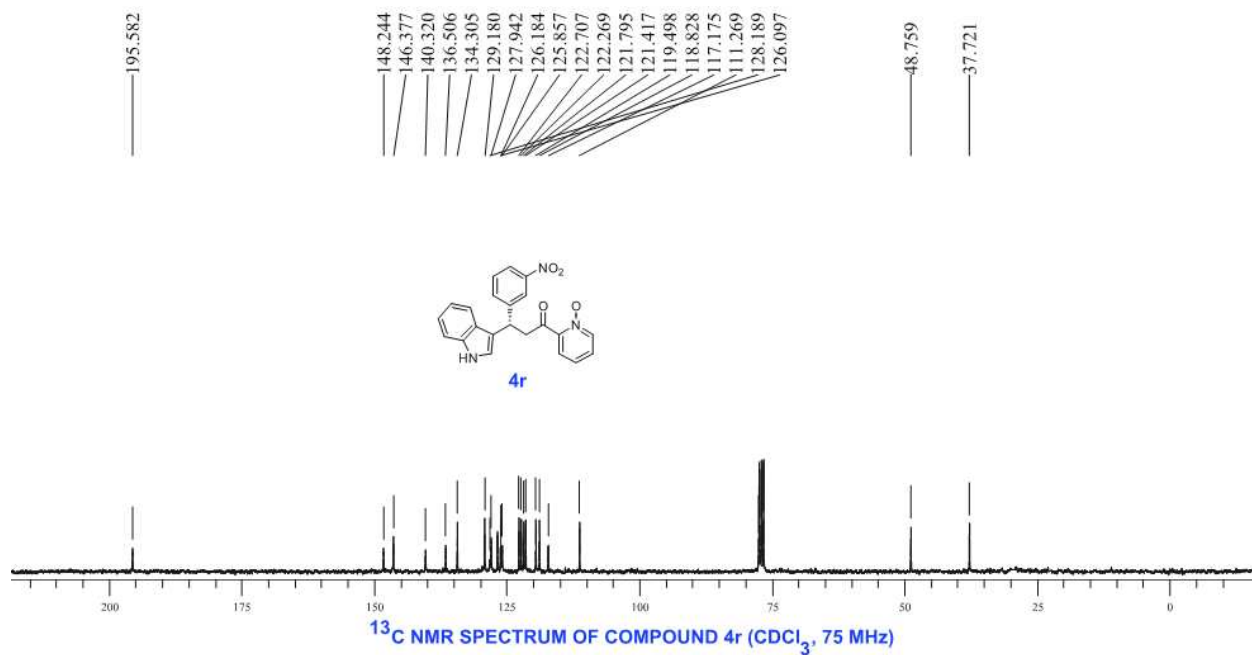

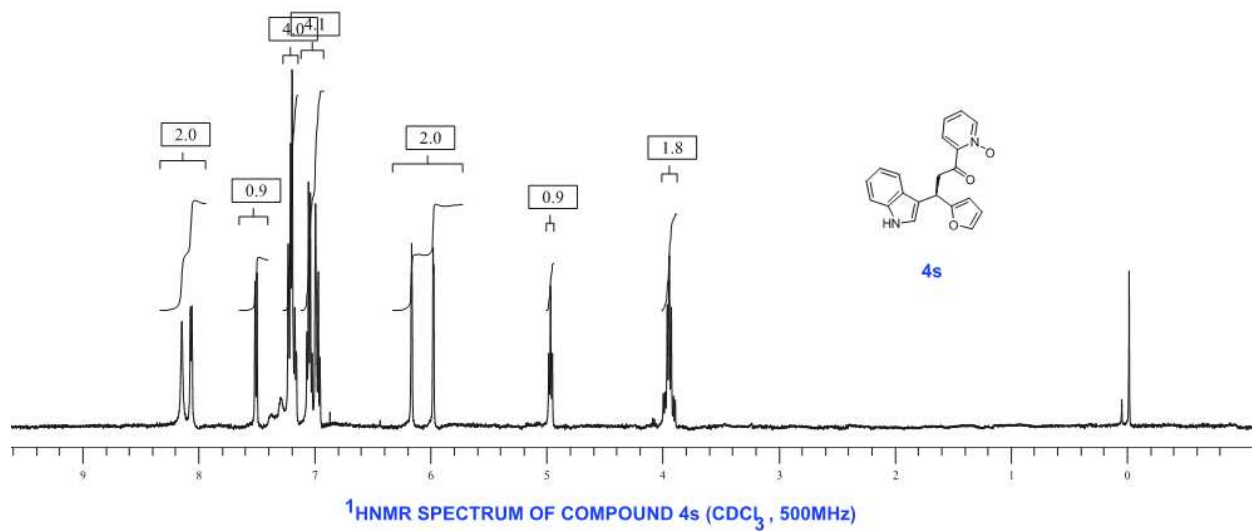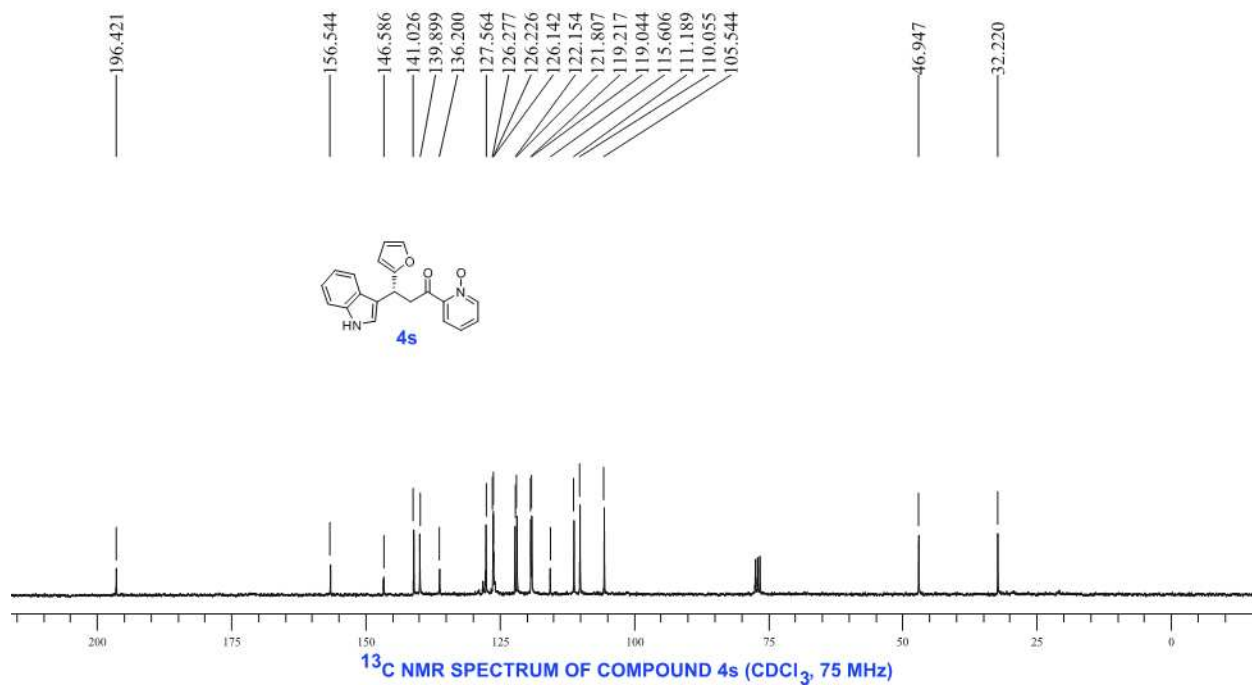

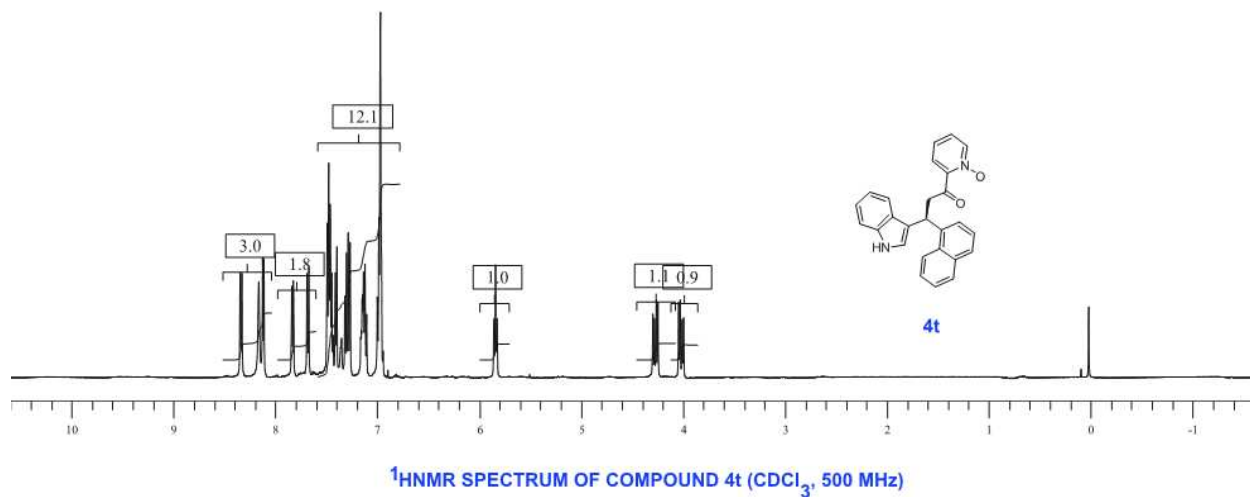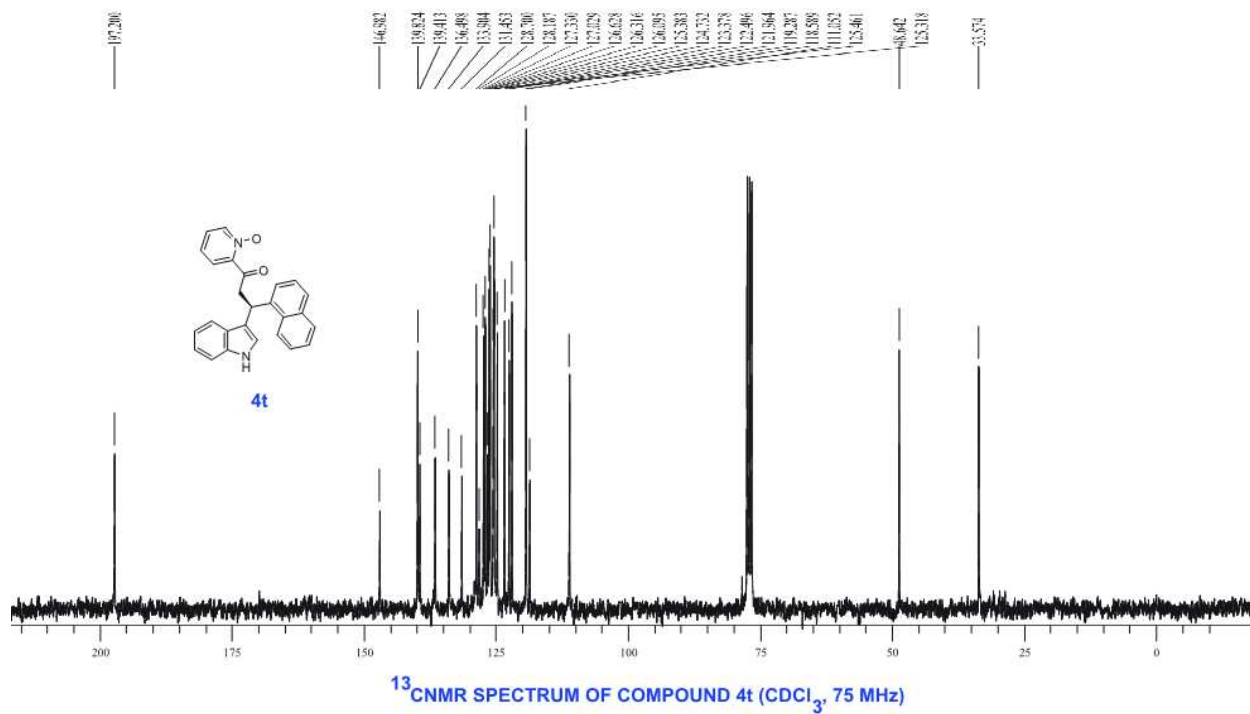

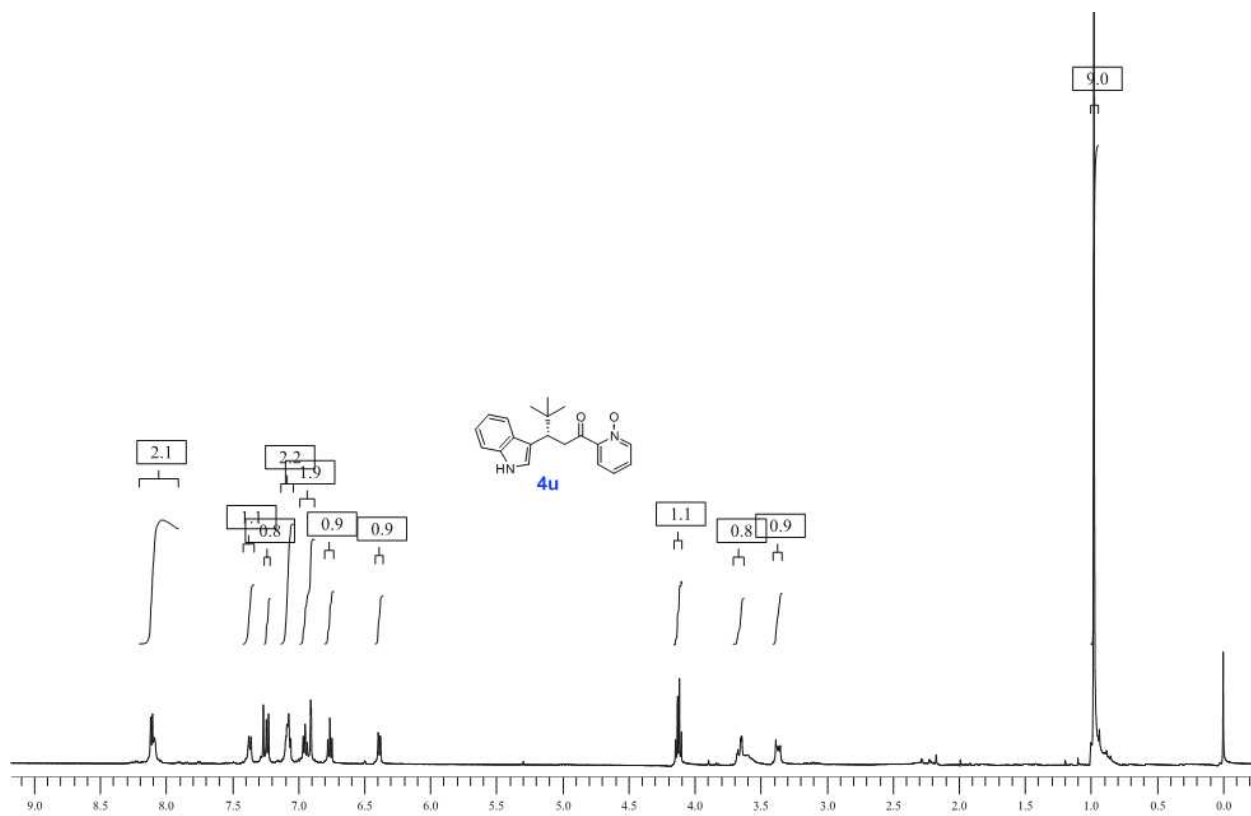

<sup>1</sup>H NMR SPECTRUM OF COMPUND 4u (CDCl<sub>3</sub>, 500 MHz)

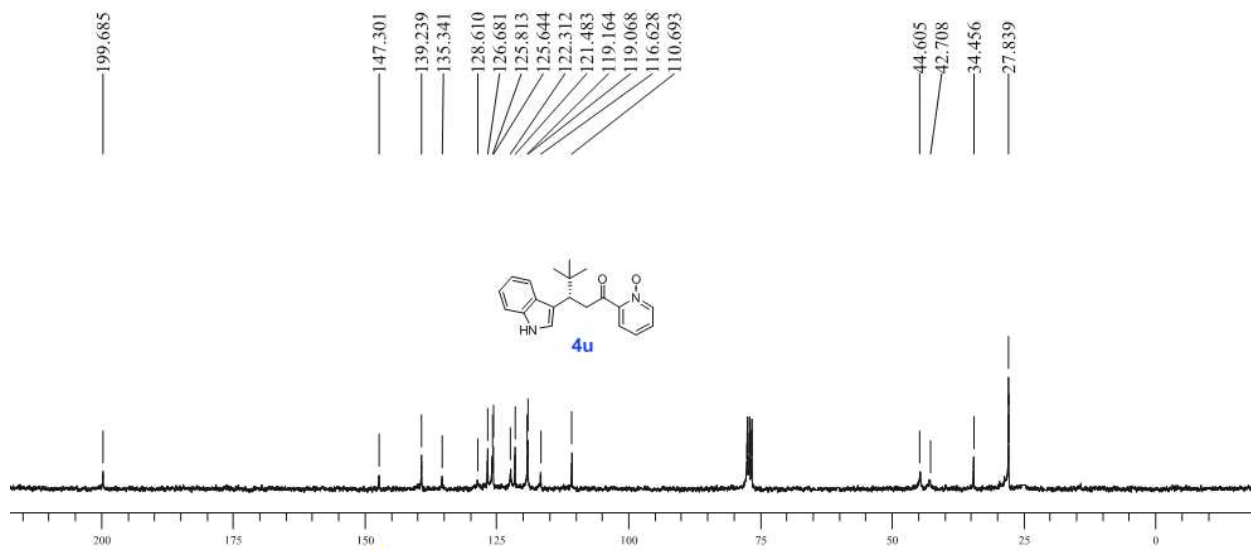

<sup>13</sup>C NMR SPECTRUM OF COMPUND 4u (CDCl<sub>3</sub>, 75 MHz)



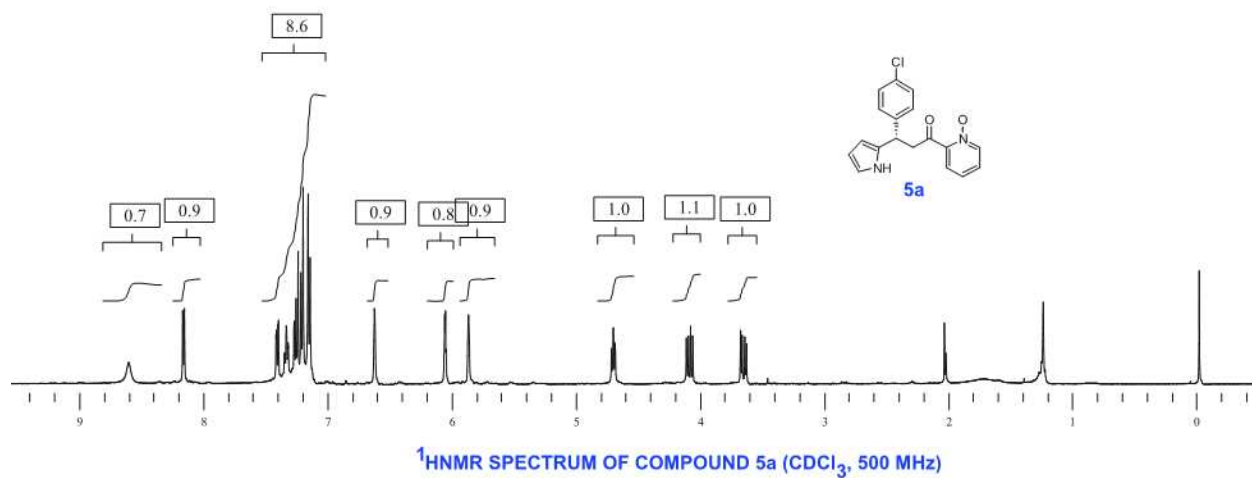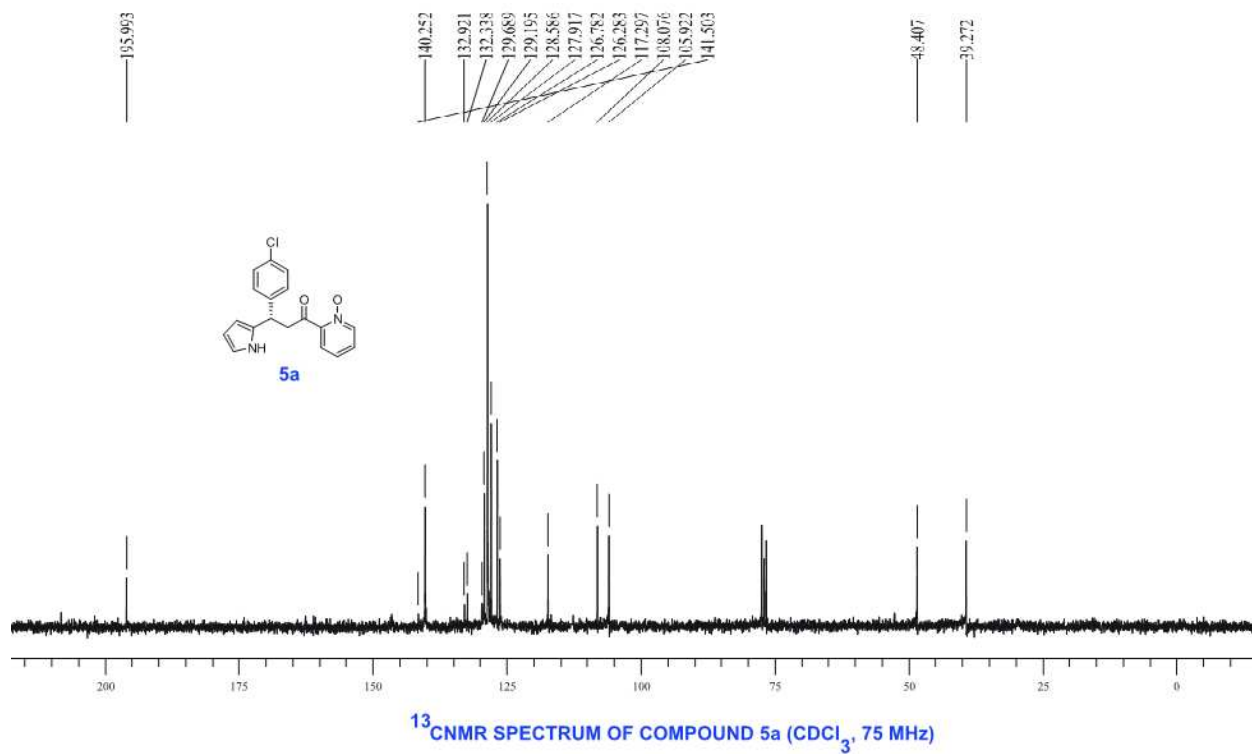

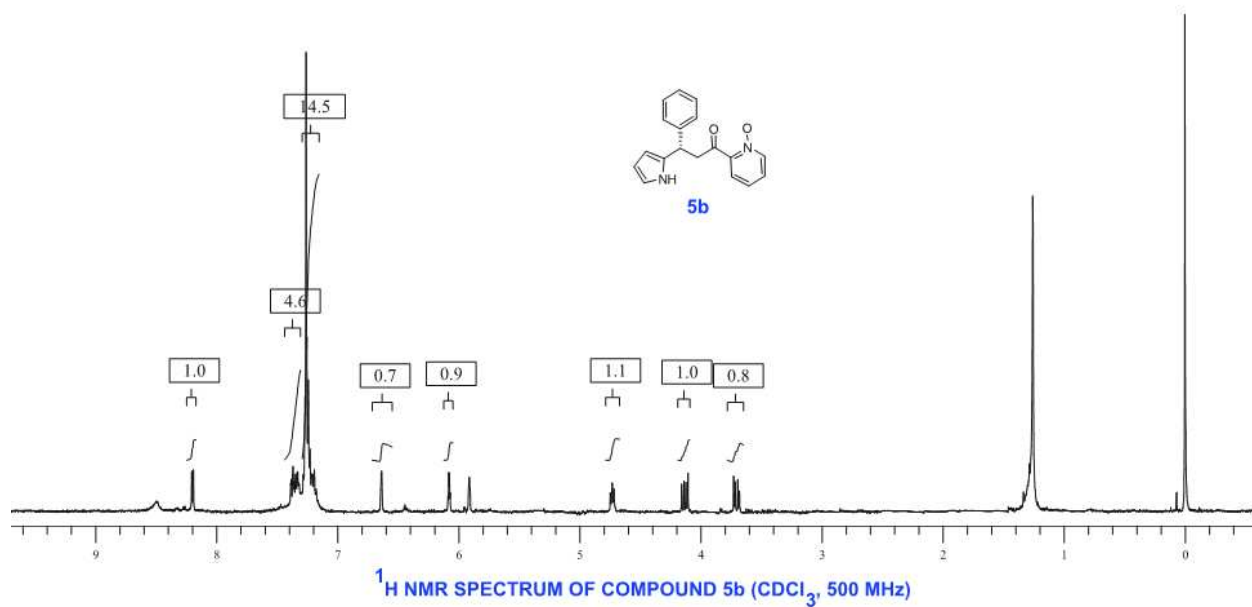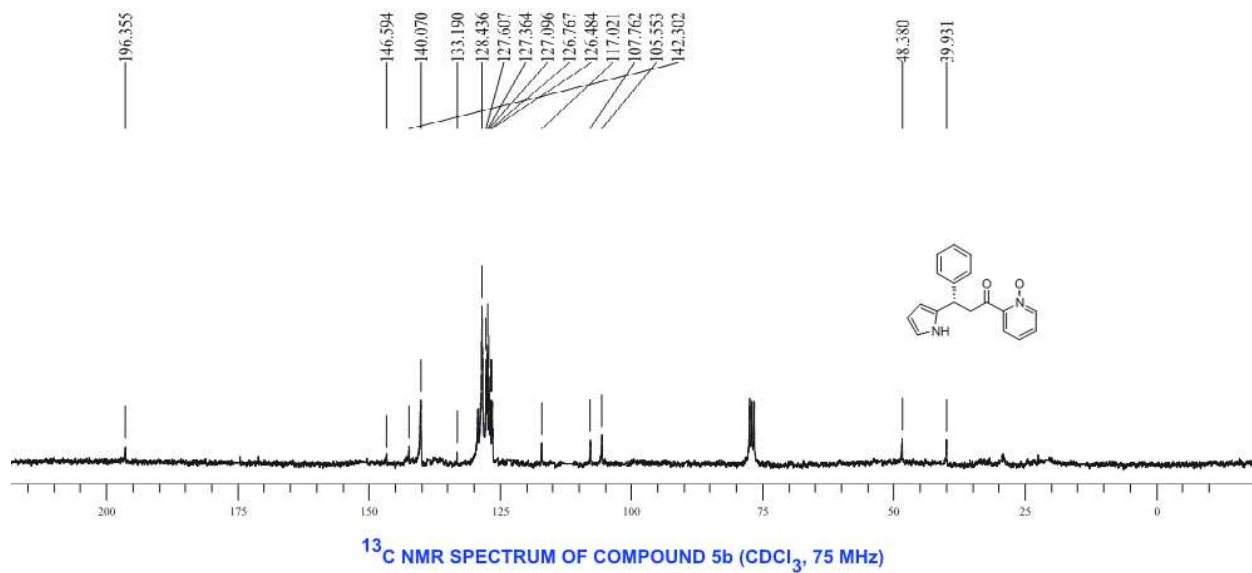

### Hplc chromatogram of 4a (racemic)

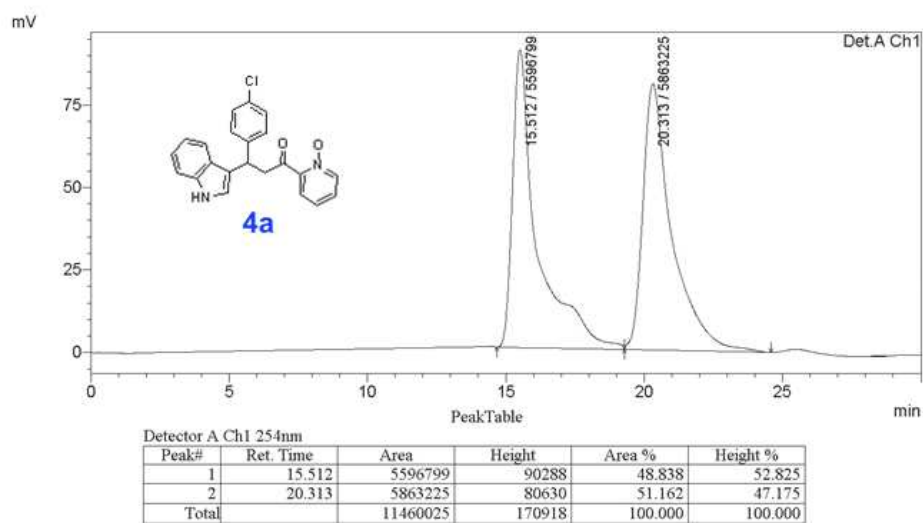

### Hplc chromatogram of 4a (chiral)

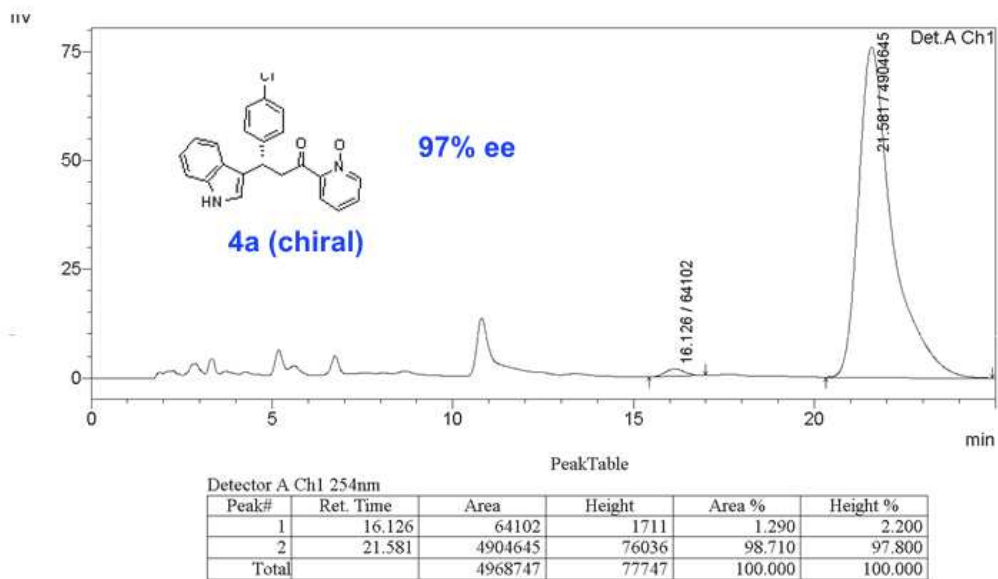

### Hplc chromatogram of 4b (racemic)

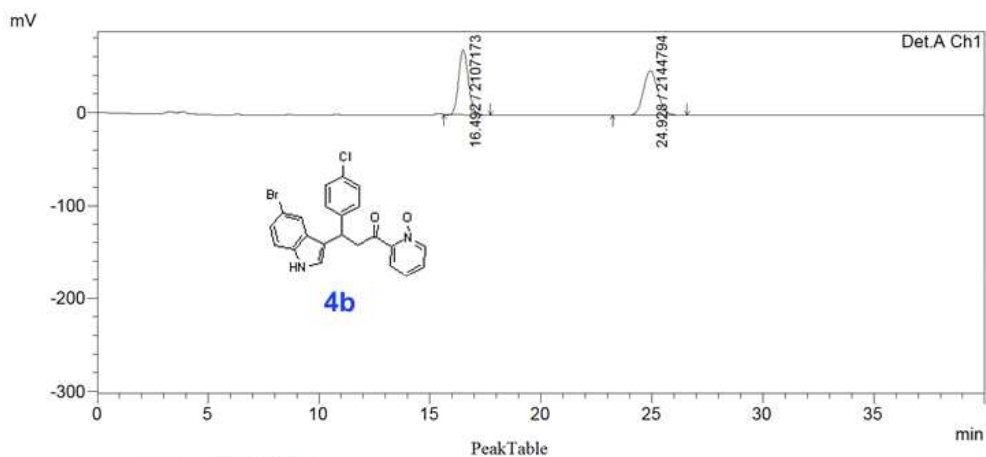

Detector A Ch1 254nm

| Peak# | Ret. Time | Area    | Height | Area %  | Height % |
|-------|-----------|---------|--------|---------|----------|
| 1     | 16.492    | 2107173 | 69791  | 49.558  | 59.431   |
| 2     | 24.928    | 2144794 | 47641  | 50.442  | 40.569   |
| Total |           | 4251967 | 117432 | 100.000 | 100.000  |

### Hplc chromatogram of 4b (chiral)

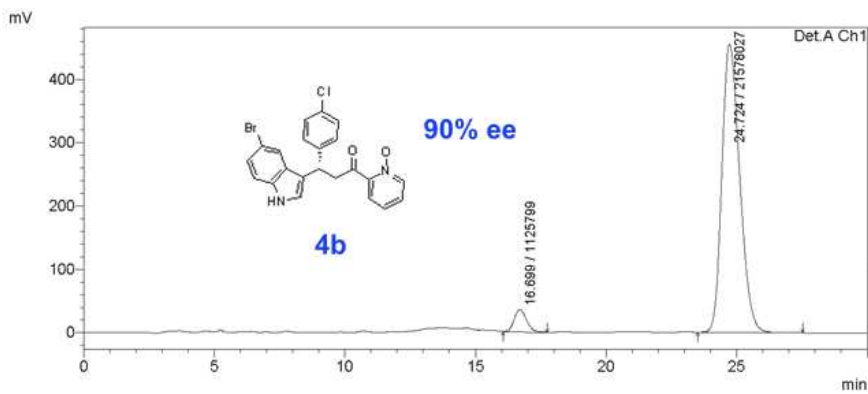

PeakTable

Detector A Ch1 254nm

| Peak# | Ret. Time | Area     | Height | Area %  | Height % |
|-------|-----------|----------|--------|---------|----------|
| 1     | 16.699    | 1125799  | 35134  | 4.959   | 7.163    |
| 2     | 24.724    | 21578027 | 455375 | 95.041  | 92.837   |
| Total |           | 22703826 | 490510 | 100.000 | 100.000  |

### Hplc chromatogram of 4c (racemic)

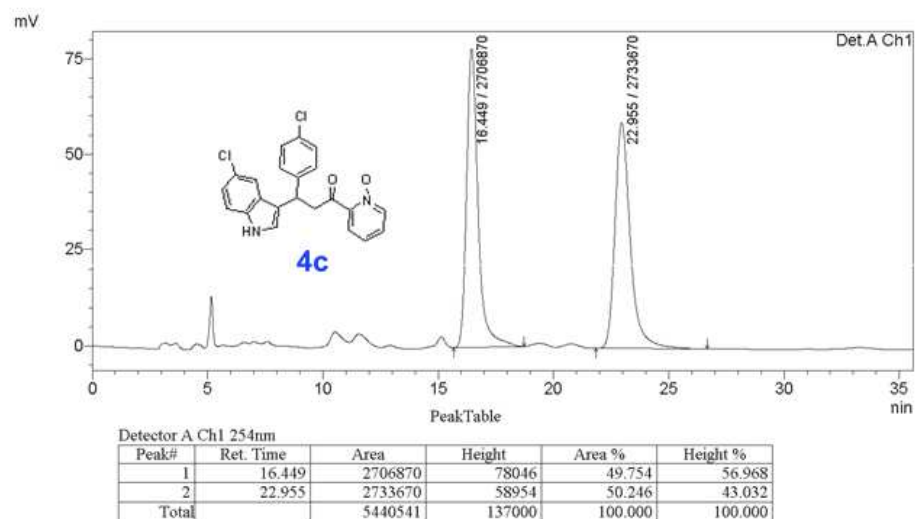

### Hplc chromatogram of 4c (chiral)

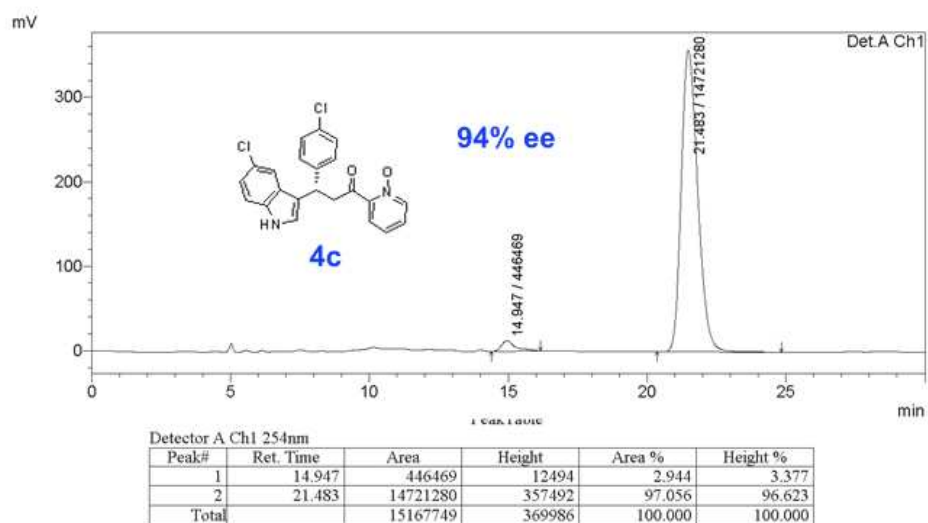

### Hplc chromatogram of 4d (racemic)

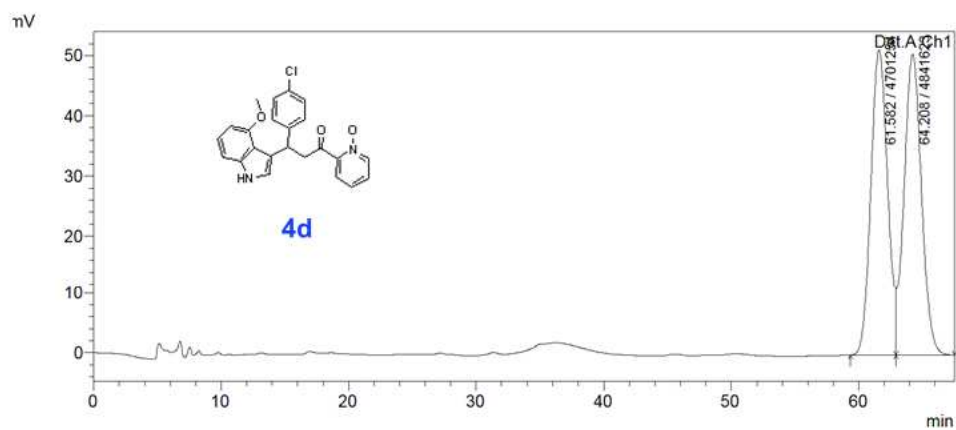

PeakTable

| Peak# | Ret. Time | Area    | Height | Area %  | Height % |
|-------|-----------|---------|--------|---------|----------|
| 1     | 61.582    | 4701254 | 51351  | 49.265  | 50.363   |
| 2     | 64.208    | 4841623 | 50610  | 50.735  | 49.637   |
| Total |           | 9542877 | 101961 | 100.000 | 100.000  |

### Hplc chromatogram of 4d (chiral)

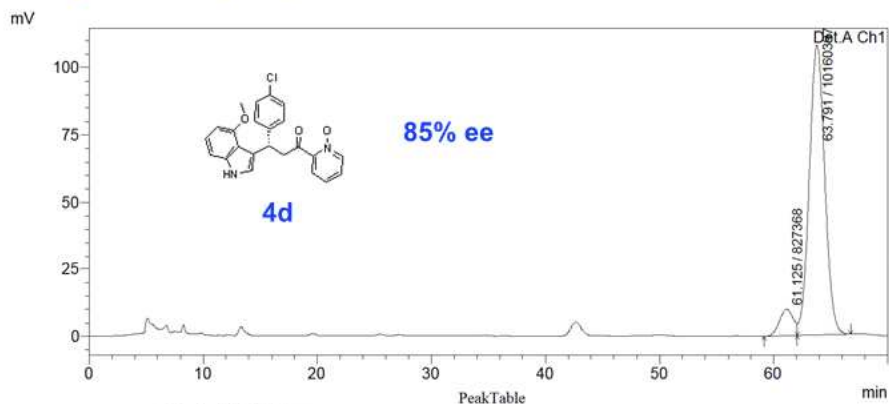

PeakTable

| Peak# | Ret. Time | Area     | Height | Area %  | Height % |
|-------|-----------|----------|--------|---------|----------|
| 1     | 61.125    | 827368   | 9773   | 7.530   | 8.307    |
| 2     | 63.791    | 10160397 | 107870 | 92.470  | 91.693   |
| Total |           | 10987765 | 117643 | 100.000 | 100.000  |

### Hplc chromatogram of 4e (racemic)

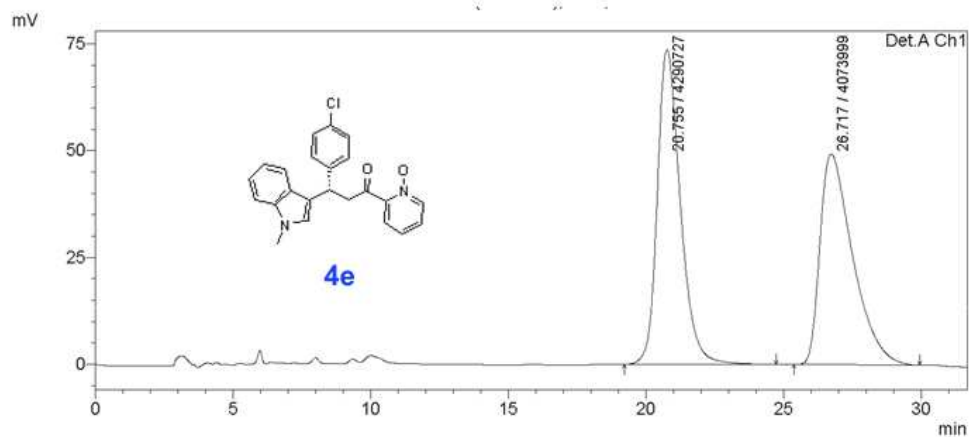

PeakTable

| Peak# | Ret. Time | Area    | Height | Area %  | Height % |
|-------|-----------|---------|--------|---------|----------|
| 1     | 20.755    | 4290727 | 73717  | 51.295  | 59.894   |
| 2     | 26.717    | 4073999 | 49363  | 48.705  | 40.106   |
| Total |           | 8364727 | 123080 | 100.000 | 100.000  |

### Hplc chromatogram of 4e (chiral)

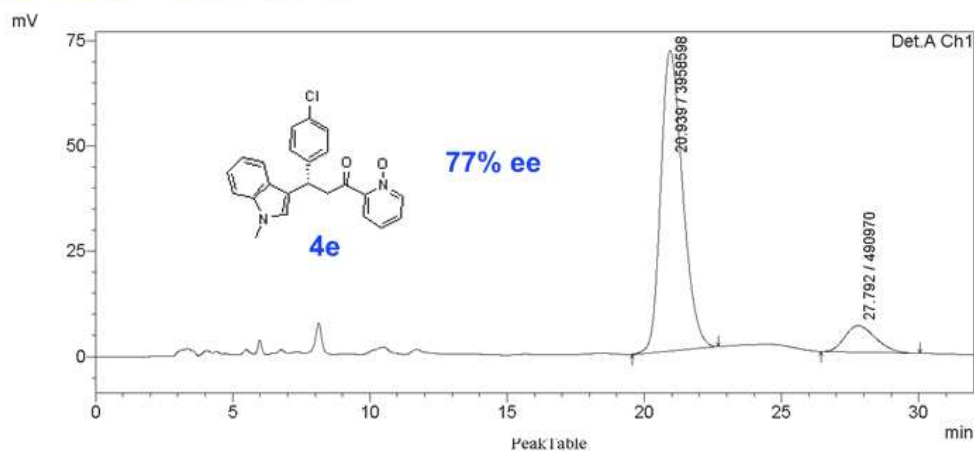

PeakTable

| Peak# | Ret. Time | Area    | Height | Area %  | Height % |
|-------|-----------|---------|--------|---------|----------|
| 1     | 20.939    | 3958598 | 71407  | 88.966  | 91.905   |
| 2     | 27.792    | 490970  | 6290   | 11.034  | 8.095    |
| Total |           | 4449569 | 77696  | 100.000 | 100.000  |

### Hplc chromatogram of 4f (racemic)

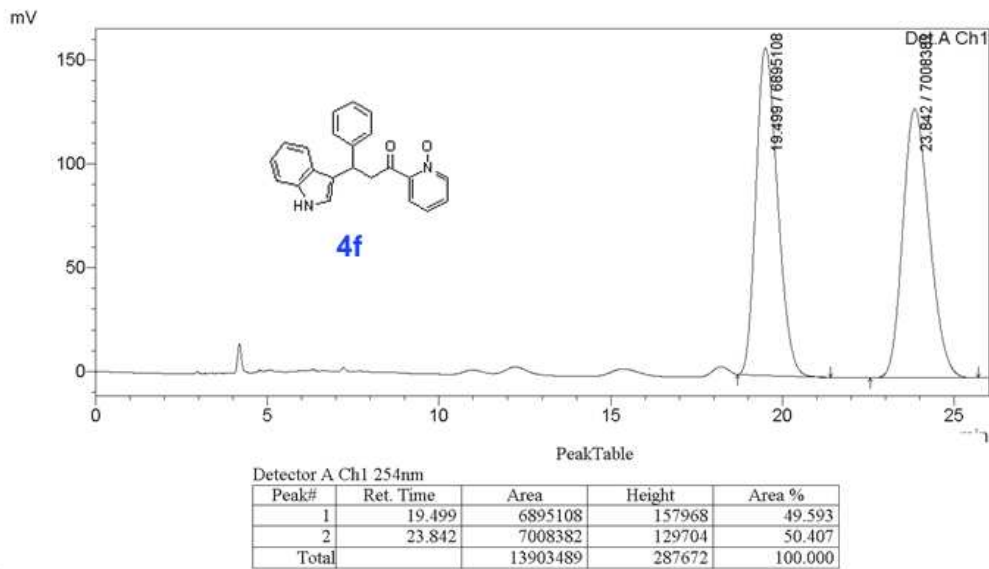

### Hplc chromatogram of 4f (chiral)

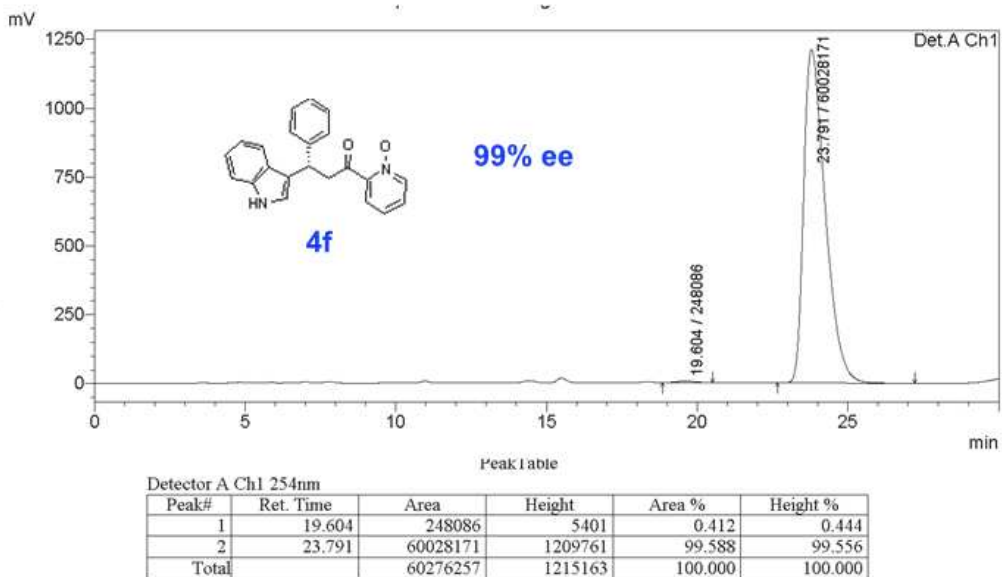



### Hplc chromatogram of 4g (racemic)

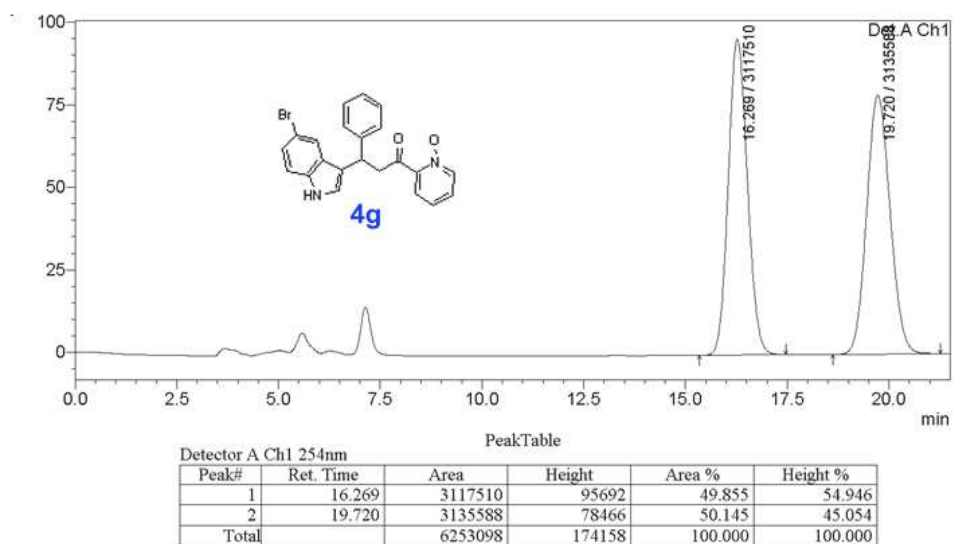

### Hplc chromatogram of 4g (chiral)

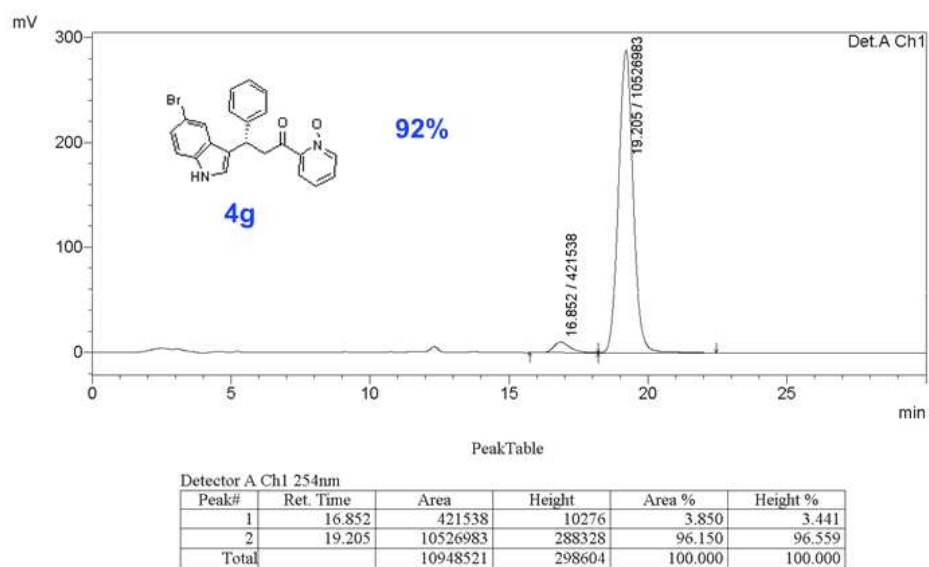

### Hplc chromatogram of 4h (racemic)

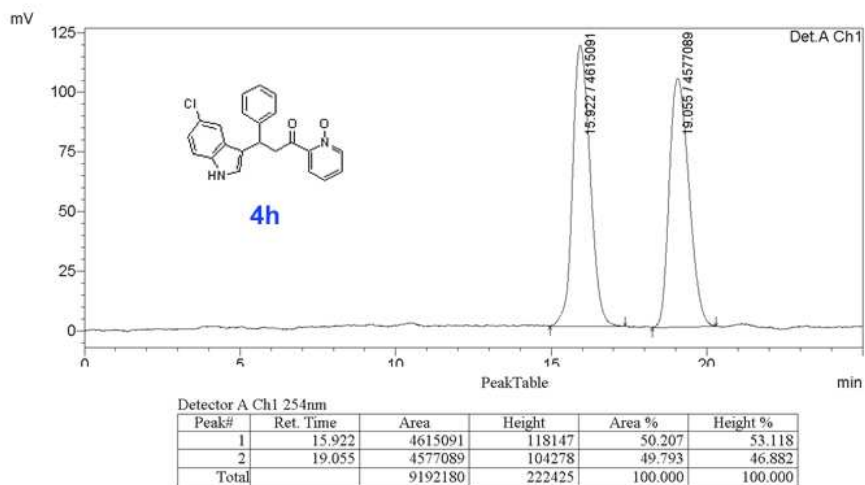

### Hplc chromatogram of 4h (chiral)

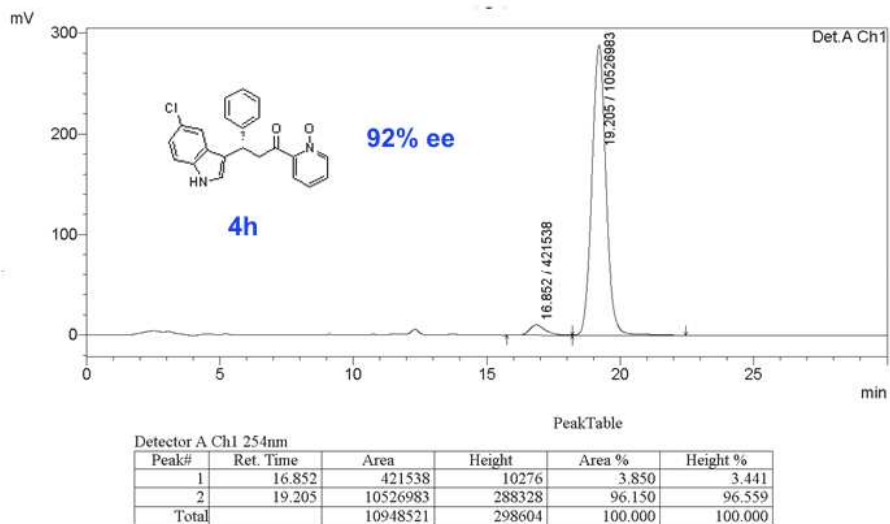

### Hplc chromatogram of 4i (racemic)

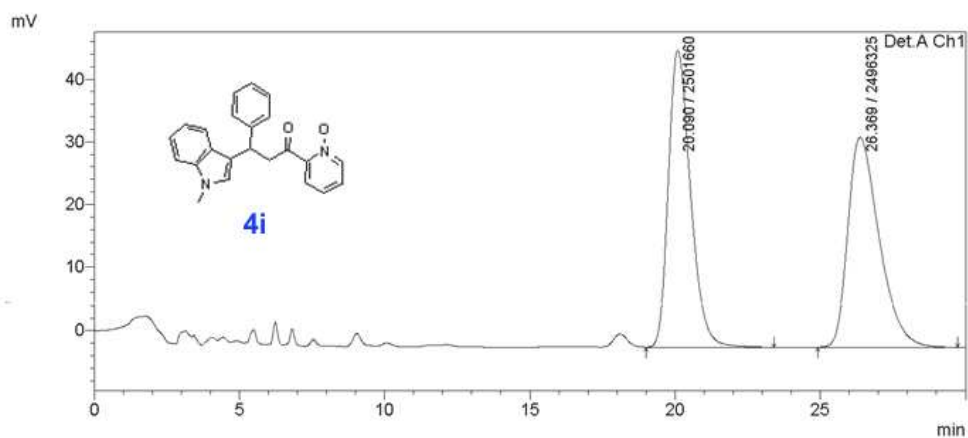

PeakTable

| Peak# | Ret. Time | Area    | Height | Area %  | Height % |
|-------|-----------|---------|--------|---------|----------|
| 1     | 20.090    | 2501660 | 47262  | 50.053  | 58.597   |
| 2     | 26.369    | 2496325 | 33394  | 49.947  | 41.403   |
| Total |           | 4997985 | 80656  | 100.000 | 100.000  |

### Hplc chromatogram of 4i (chiral)

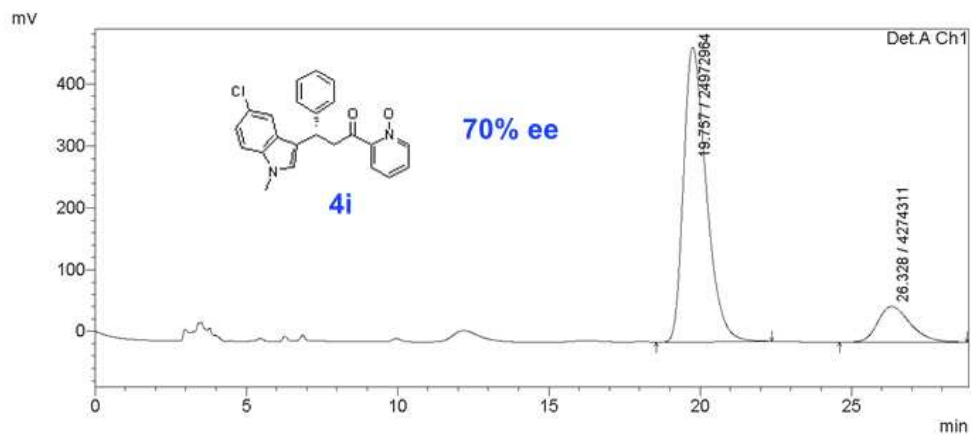

PeakTable

| Peak# | Ret. Time | Area     | Height | Area %  | Height % |
|-------|-----------|----------|--------|---------|----------|
| 1     | 19.757    | 24972964 | 476798 | 85.386  | 89.229   |
| 2     | 26.328    | 4274311  | 57552  | 14.614  | 10.771   |
| Total |           | 29247275 | 534350 | 100.000 | 100.000  |

### Hplc chromatogram of 4j (racemic)

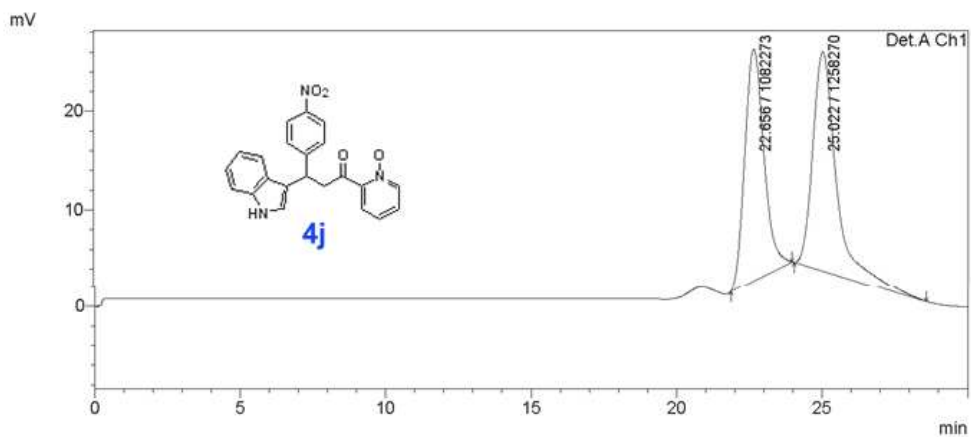

Detector A Ch1 254nm

| Peak# | Ret. Time | Area    | Height | Area %  | Height % |
|-------|-----------|---------|--------|---------|----------|
| 1     | 22.656    | 1082273 | 23566  | 46.240  | 51.380   |
| 2     | 25.022    | 1258270 | 22301  | 53.760  | 48.620   |
| Total |           | 2340543 | 45867  | 100.000 | 100.000  |

### Hplc chromatogram of 4j (chiral)

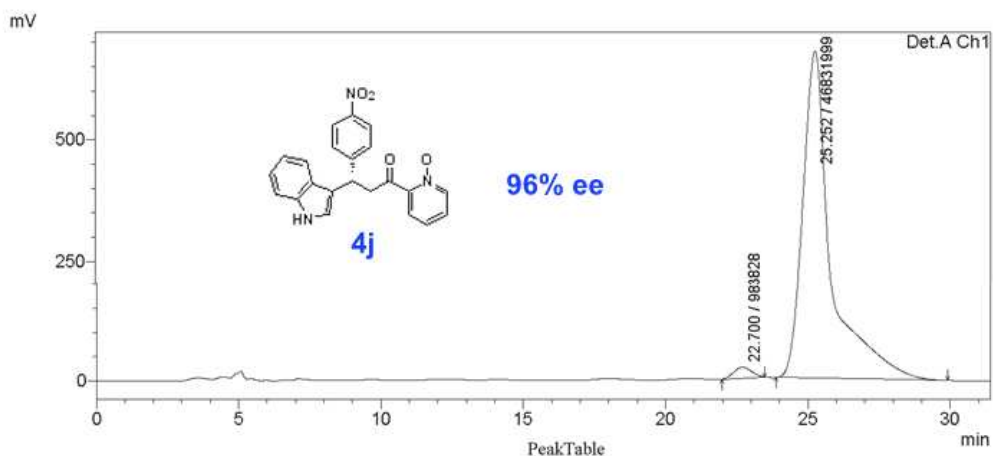

Detector A Ch1 254nm

| Peak# | Ret. Time | Area     | Height | Area %  | Height % |
|-------|-----------|----------|--------|---------|----------|
| 1     | 22.700    | 983828   | 22758  | 2.058   | 3.255    |
| 2     | 25.252    | 46831999 | 676434 | 97.942  | 96.745   |
| Total |           | 47815827 | 699192 | 100.000 | 100.000  |

### Hplc chromatogram of 4k (racemic)

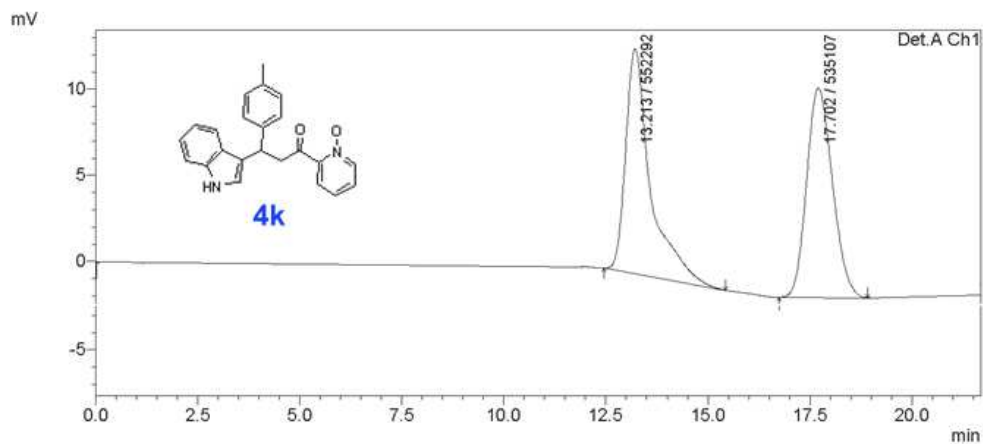

PeakTable

| Peak# | Ret. Time | Area    | Height | Area %  | Height % |
|-------|-----------|---------|--------|---------|----------|
| 1     | 13.213    | 552292  | 13074  | 50.790  | 51.804   |
| 2     | 17.702    | 535107  | 12163  | 49.210  | 48.196   |
| Total |           | 1087399 | 25237  | 100.000 | 100.000  |

### Hplc chromatogram of 4k (chiral)

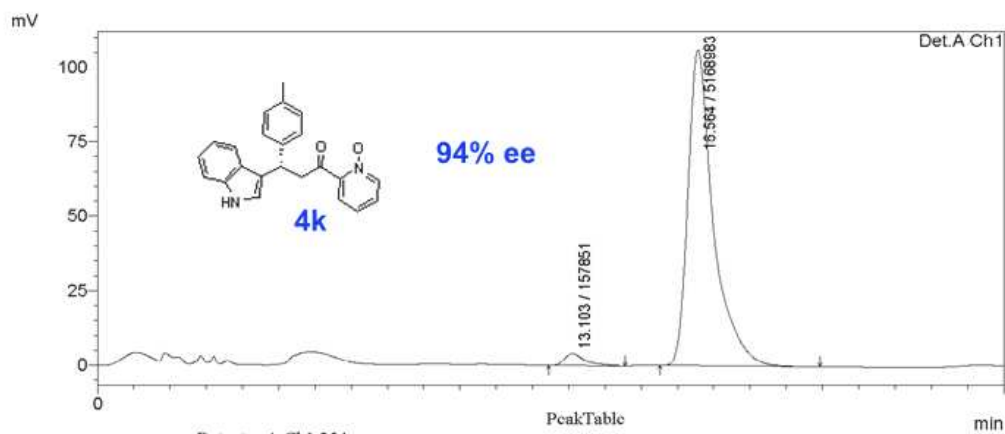

PeakTable

| Peak# | Ret. Time | Area    | Height | Area %  | Height % |
|-------|-----------|---------|--------|---------|----------|
| 1     | 13.103    | 157851  | 4060   | 2.963   | 3.687    |
| 2     | 16.564    | 5168983 | 106063 | 97.037  | 96.313   |
| Total |           | 5326835 | 110124 | 100.000 | 100.000  |

### Hplc chromatogram of 4I (racemic)

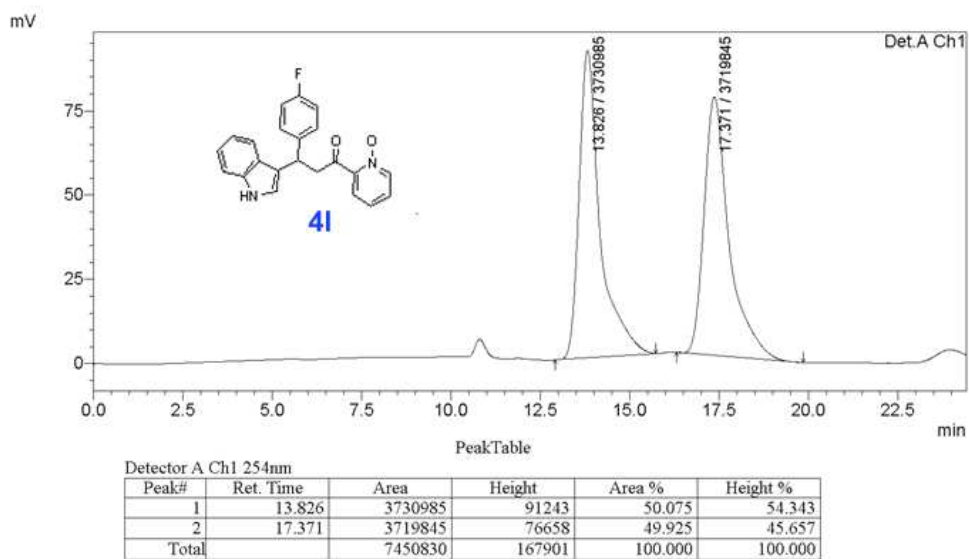

### Hplc chromatogram of 4I (chiral)

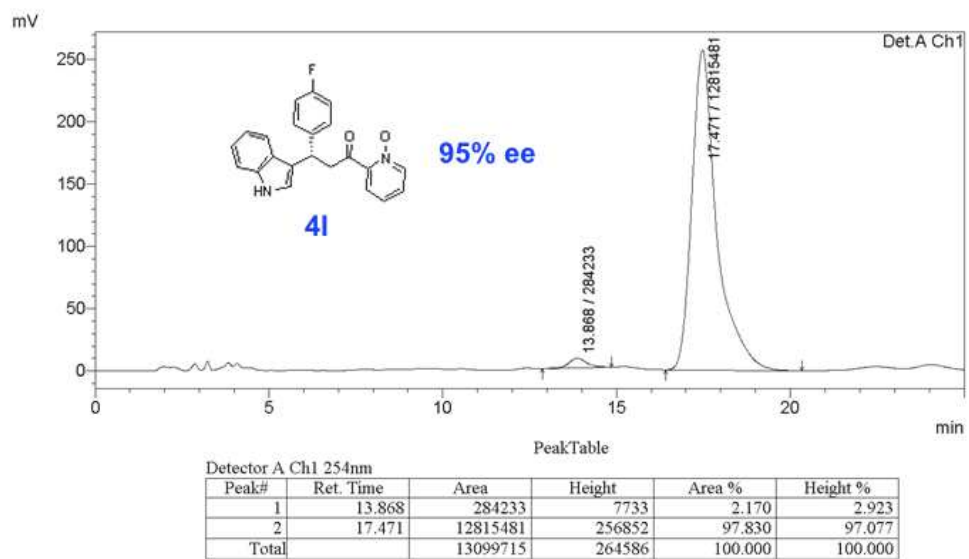

### Hplc chromatogram of 4m (racemic)

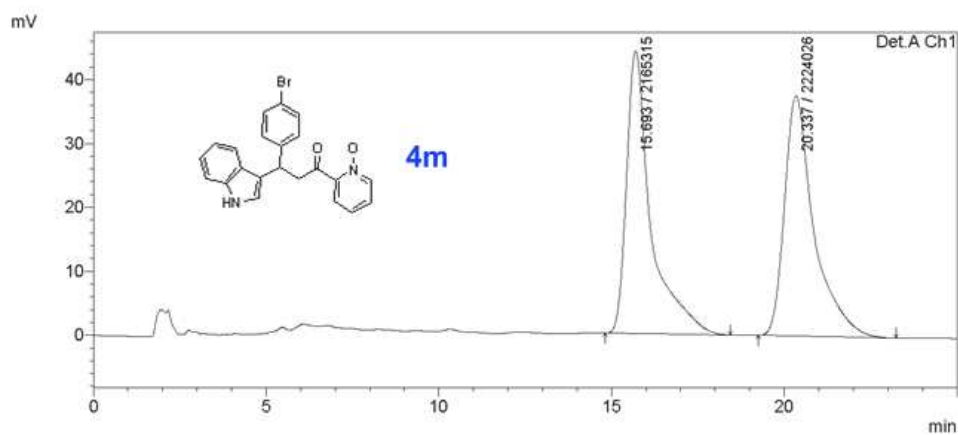

Detector A Ch1 254nm

| Peak# | Ret. Time | Area    | Height | Area %  | Height % |
|-------|-----------|---------|--------|---------|----------|
| 1     | 15.693    | 2165315 | 44293  | 49.331  | 54.108   |
| 2     | 20.337    | 2224026 | 37568  | 50.669  | 45.892   |
| Total |           | 4389341 | 81861  | 100.000 | 100.000  |

### Hplc chromatogram of 4m (chiral)

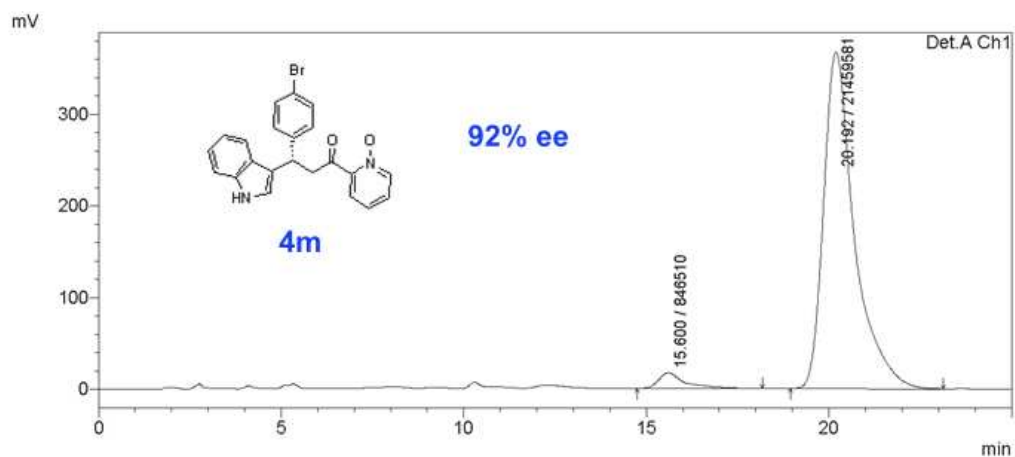

Detector A Ch1 254nm

| Peak# | Ret. Time | Area     | Height | Area %  | Height % |
|-------|-----------|----------|--------|---------|----------|
| 1     | 15.600    | 846510   | 17055  | 3.795   | 4.436    |
| 2     | 20.192    | 21459581 | 367406 | 96.205  | 95.564   |
| Total |           | 22306091 | 384461 | 100.000 | 100.000  |

### Hplc chromatogra of 4n (racemic)

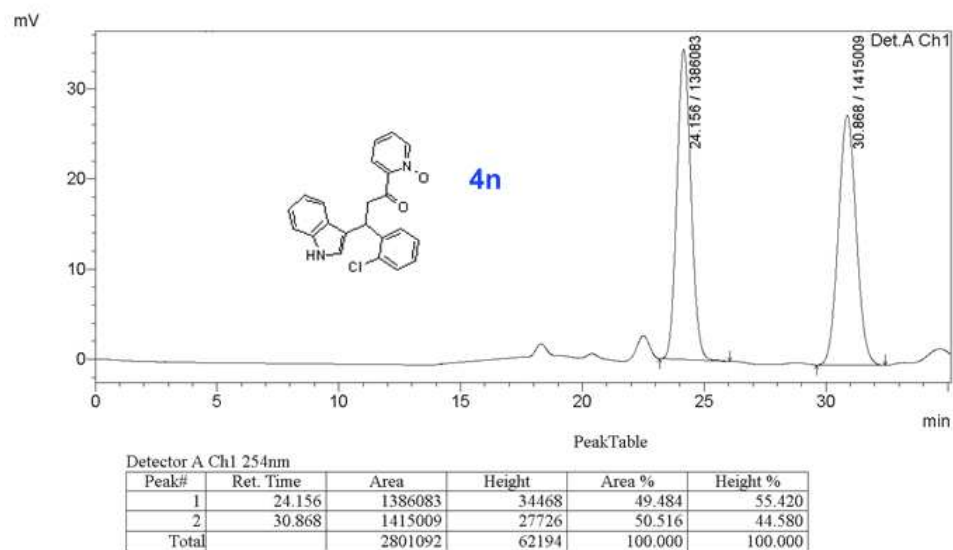

### Hplc chromatogram of 4n (chiral)

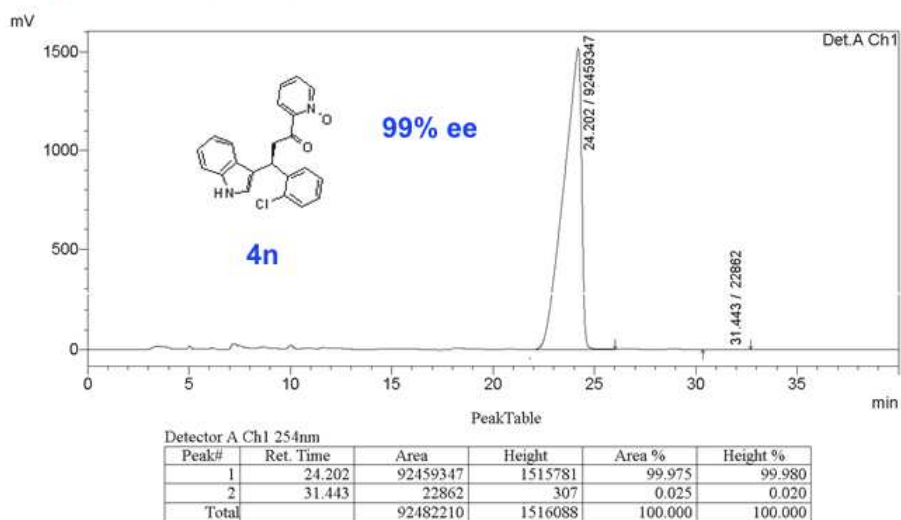



### Hplc chromatogram of 4o (racemic)

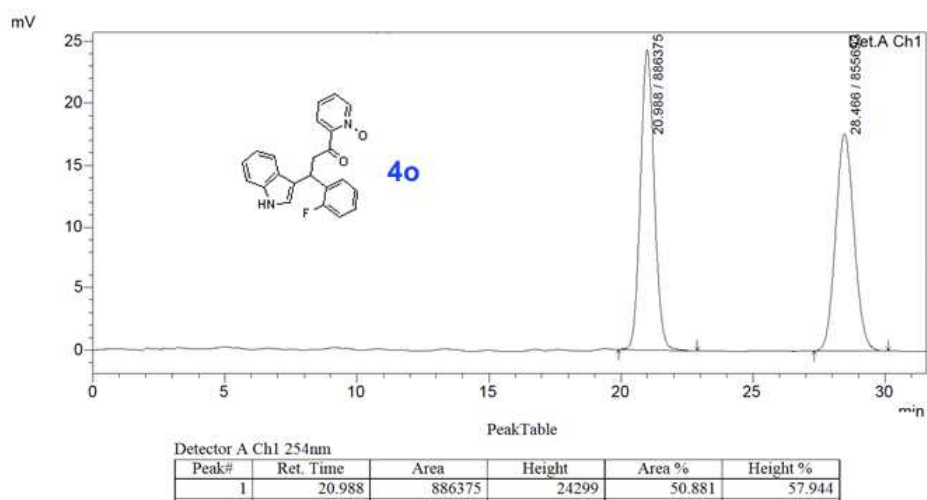

### Hplc chromatogram of 4o (chiral)

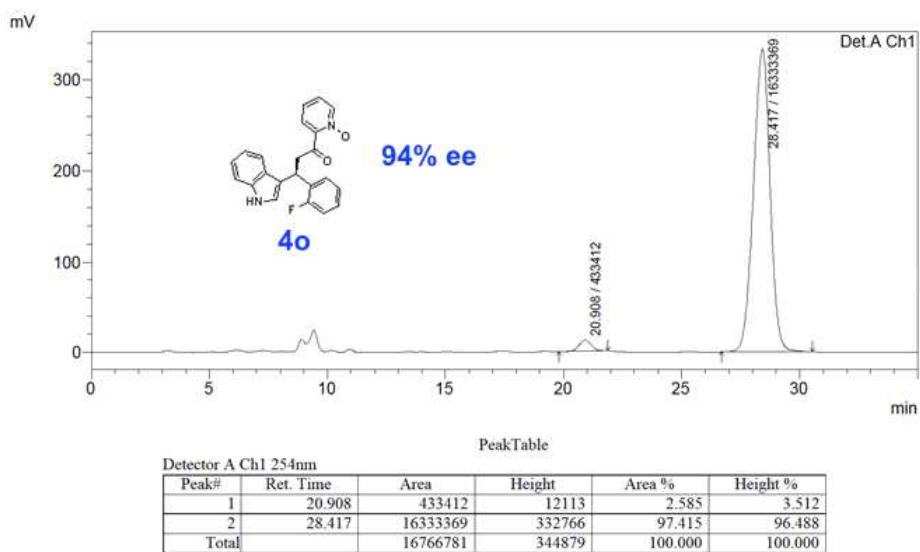

### Hplc chromatogram of 4p (racemic)

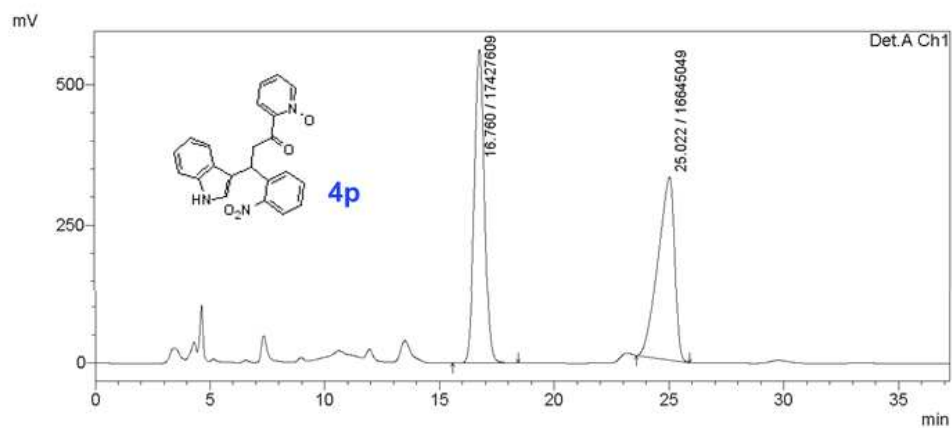

Detector A Ch1 254nm

PeakTable

| Peak# | Ret. Time | Area     | Height | Area %  | Height % |
|-------|-----------|----------|--------|---------|----------|
| 1     | 16.760    | 17427609 | 563841 | 51.148  | 63.064   |
| 2     | 25.022    | 16645049 | 330230 | 48.852  | 36.936   |
| Total |           | 34072658 | 894071 | 100.000 | 100.000  |

### Hplc chromatogram of 4p (chiral)

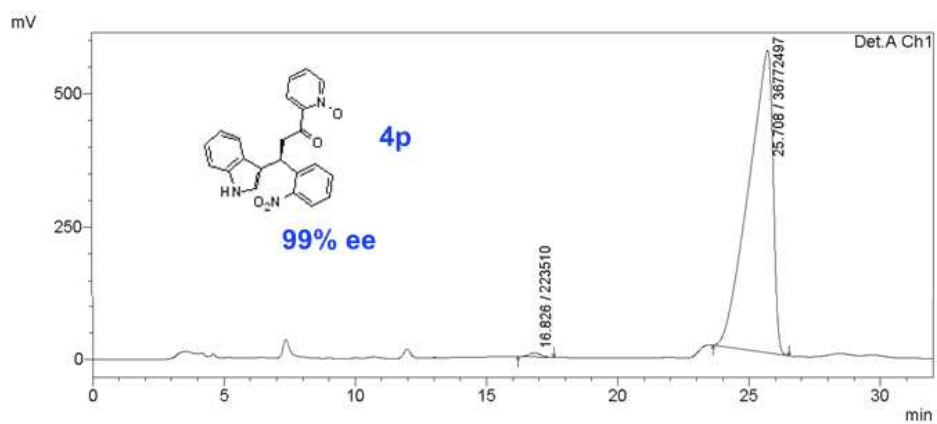

Detector A Ch1 254nm

PeakTable

| Peak# | Ret. Time | Area     | Height | Area %  | Height % |
|-------|-----------|----------|--------|---------|----------|
| 1     | 16.826    | 223510   | 7386   | 0.604   | 1.278    |
| 2     | 25.708    | 36772497 | 570453 | 99.396  | 98.722   |
| Total |           | 36996007 | 577839 | 100.000 | 100.000  |

### Hplc chromatogram of 4q (racemic)

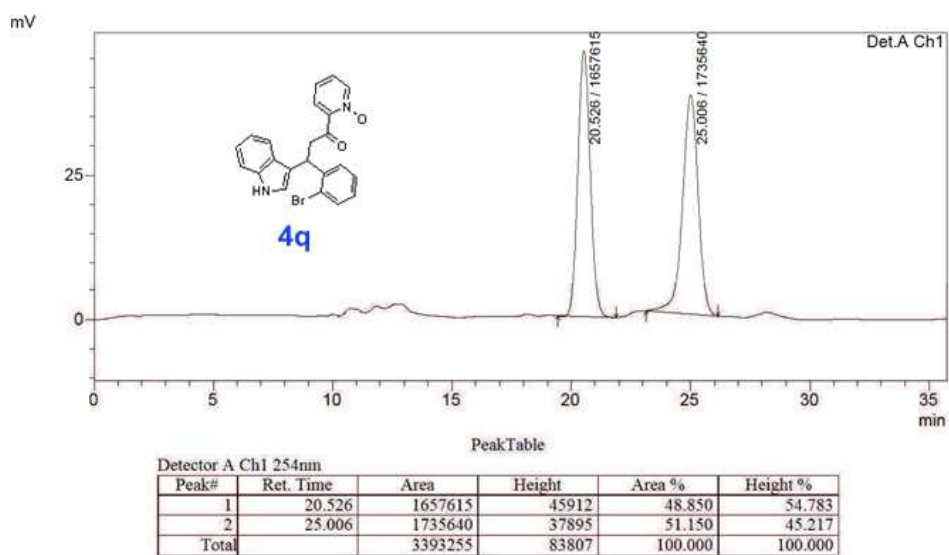

### Hplc chromatogram of 4q (chiral)

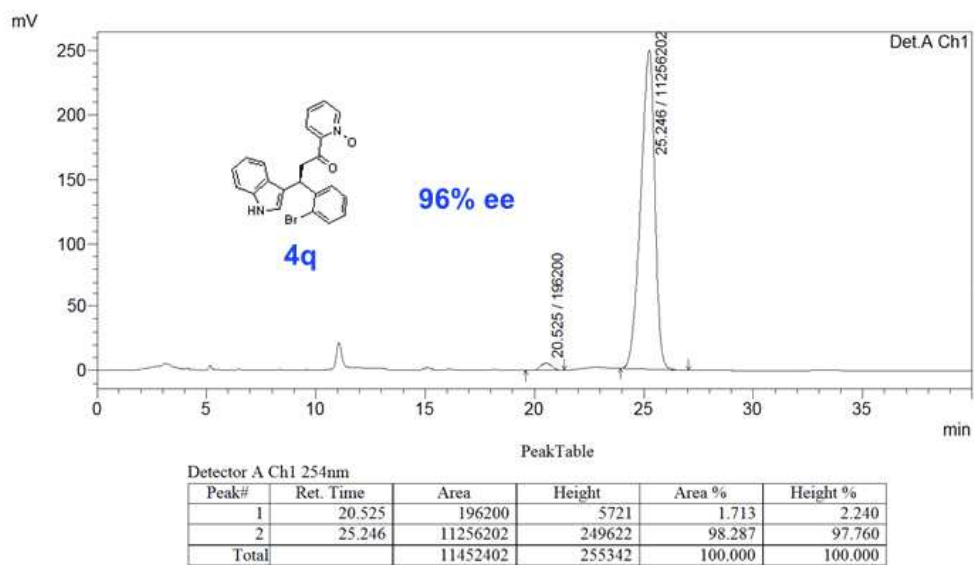

### Hplc chromatogram of 4r (racemic)

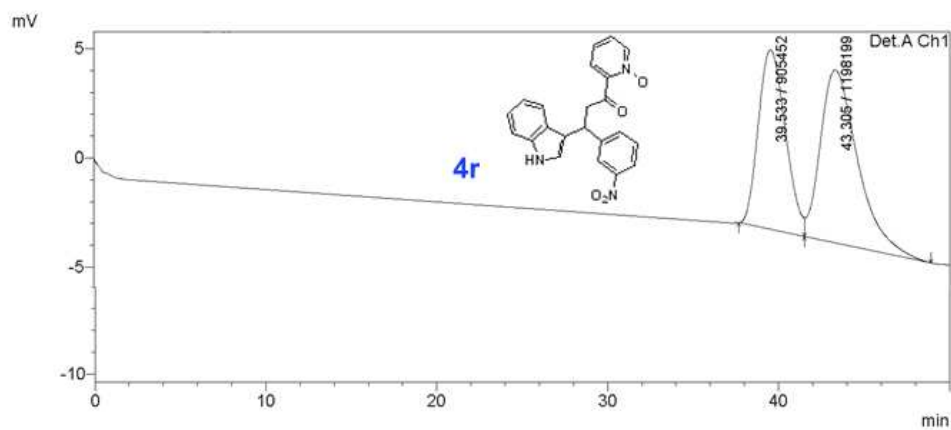

Detector A Ch1 254nm

| Peak# | Ret. Time | Area    | Height | Area %  | Height % |
|-------|-----------|---------|--------|---------|----------|
| 1     | 39.533    | 905452  | 8223   | 43.042  | 50.918   |
| 2     | 43.305    | 1198199 | 7927   | 56.958  | 49.082   |
| Total |           | 2103650 | 16150  | 100.000 | 100.000  |

### Hplc chromatogram of 4r (chiral)

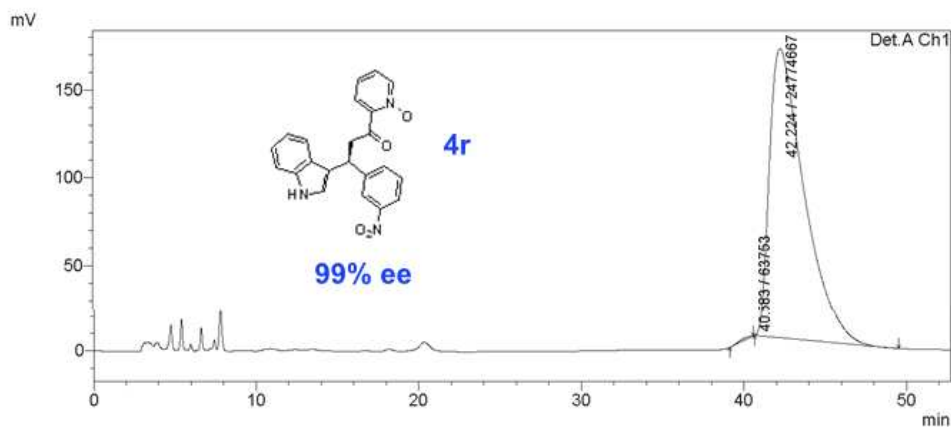

PeakTable

| Peak# | Ret. Time | Area     | Height | Area %  | Height % |
|-------|-----------|----------|--------|---------|----------|
| 1     | 40.583    | 63753    | 19     | 0.257   | 0.011    |
| 2     | 42.224    | 24774667 | 165929 | 99.743  | 99.989   |
| Total |           | 24838420 | 165948 | 100.000 | 100.000  |

### Hplc chromatogram of 4s (racemic)

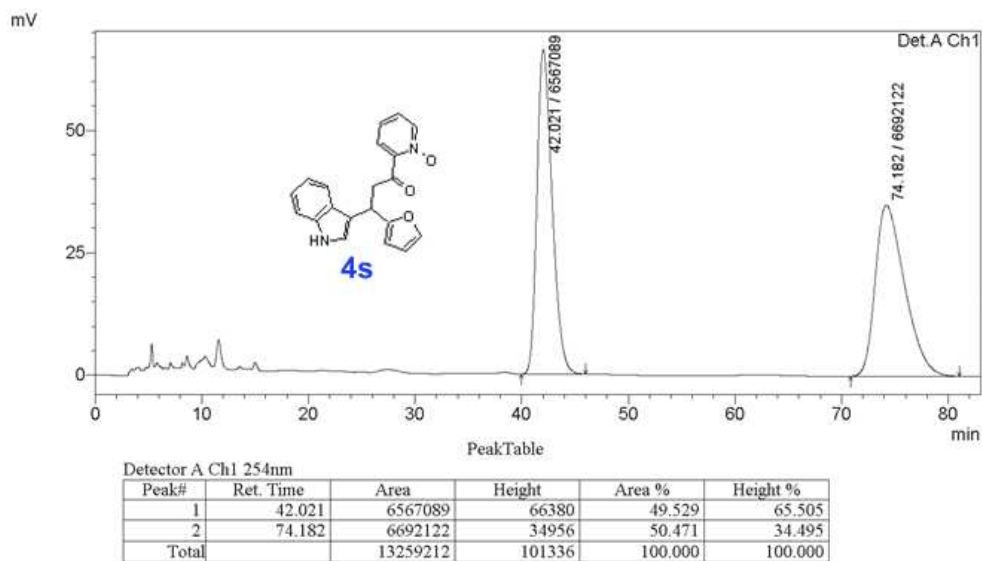

### Hplc chromatogram of 4s (chiral)

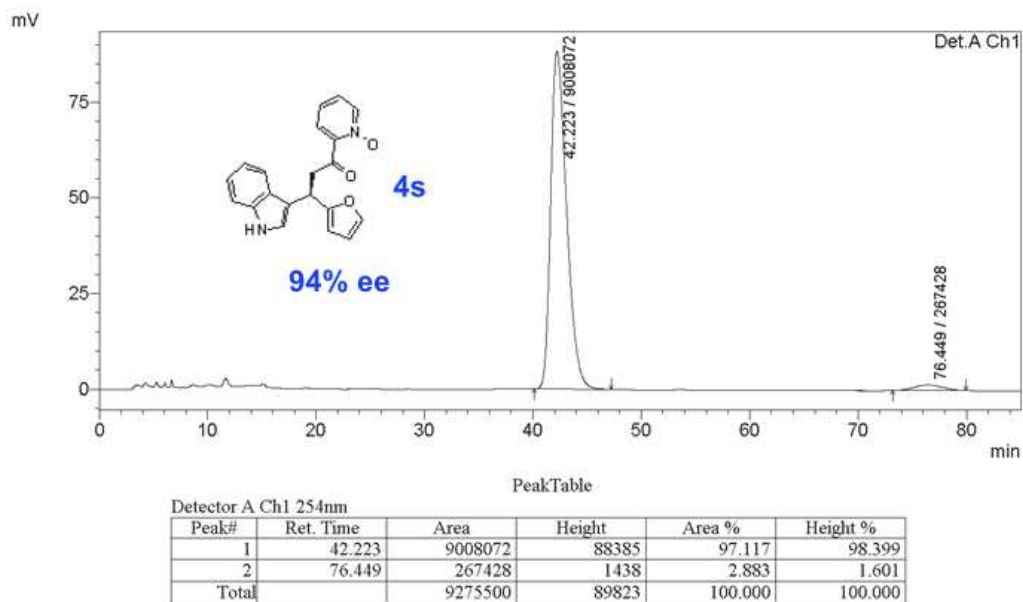

### Hplc chromatogram of 4t (racemic)

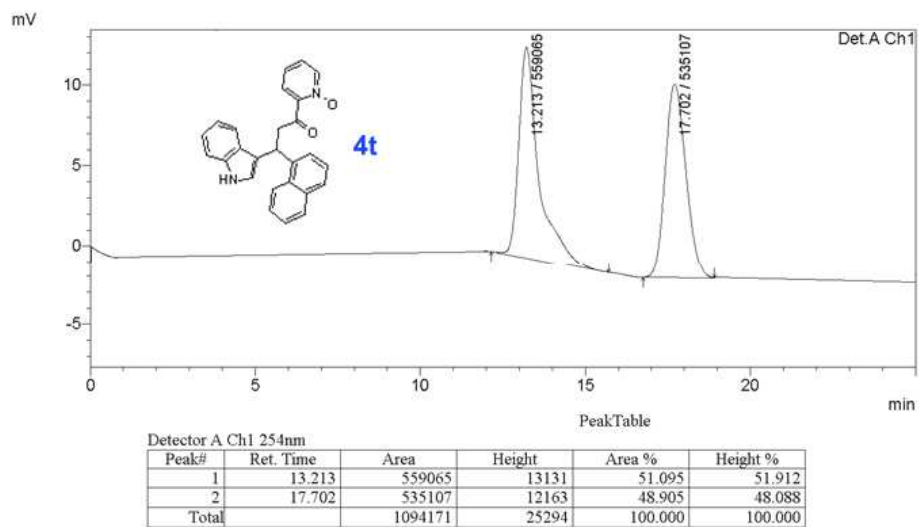

### Hplc chromatogram of 4t (chiral)

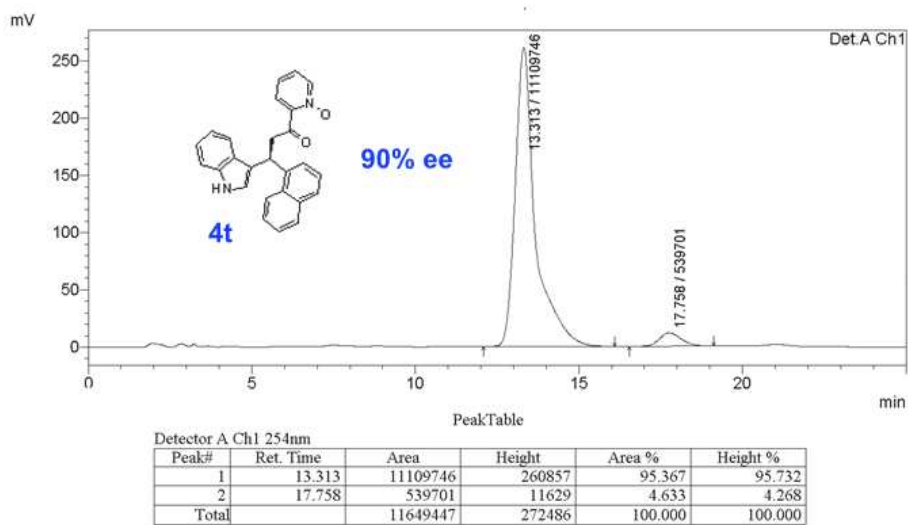

### Hplc chromatogram of 4u (racemic)

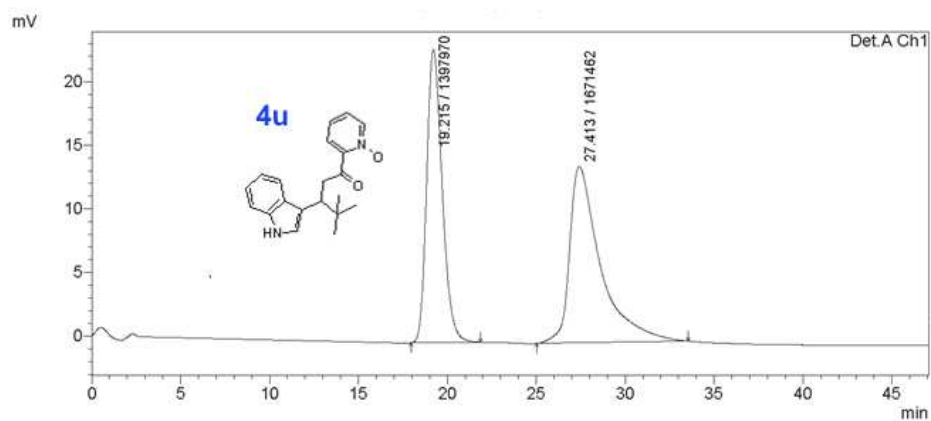

Detector A Ch1 254nm

| Peak# | Ret. Time | Area    | Height | Area %  | Height % |
|-------|-----------|---------|--------|---------|----------|
| 1     | 19.215    | 1397970 | 23063  | 45.545  | 62.469   |
| 2     | 27.413    | 1671462 | 13856  | 54.455  | 37.531   |
| Total |           | 3069432 | 36919  | 100.000 | 100.000  |

### Hplc chromatogram of 4u (chiral)

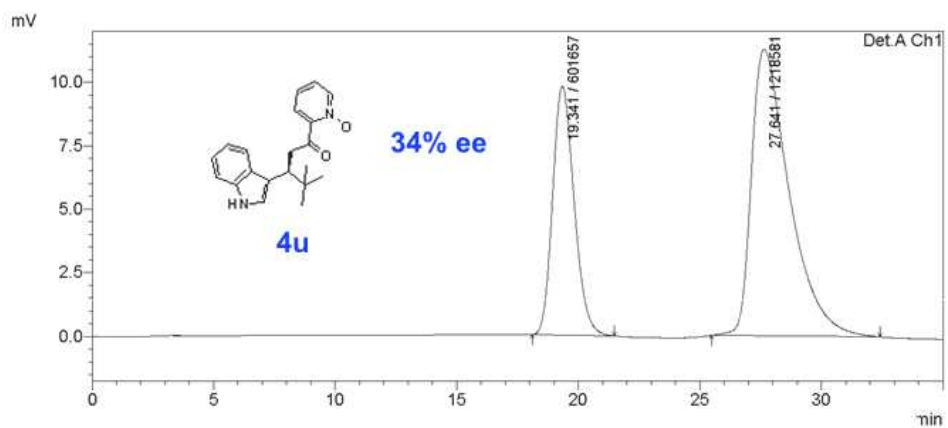

Detector A Ch1 254nm

| Peak# | Ret. Time | Area    | Height | Area %  | Height % |
|-------|-----------|---------|--------|---------|----------|
| 1     | 19.341    | 601657  | 9786   | 33.054  | 46.463   |
| 2     | 27.641    | 1218581 | 11276  | 66.946  | 53.537   |
| Total |           | 1820238 | 21062  | 100.000 | 100.000  |

### Hplc chromatogram of 5a (racemic)

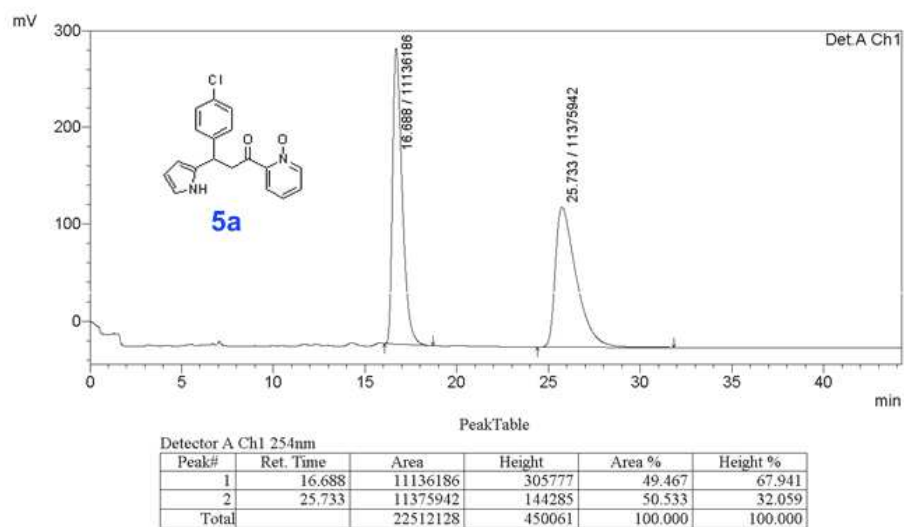

### Hplc chromatogram of 5a (chiral)

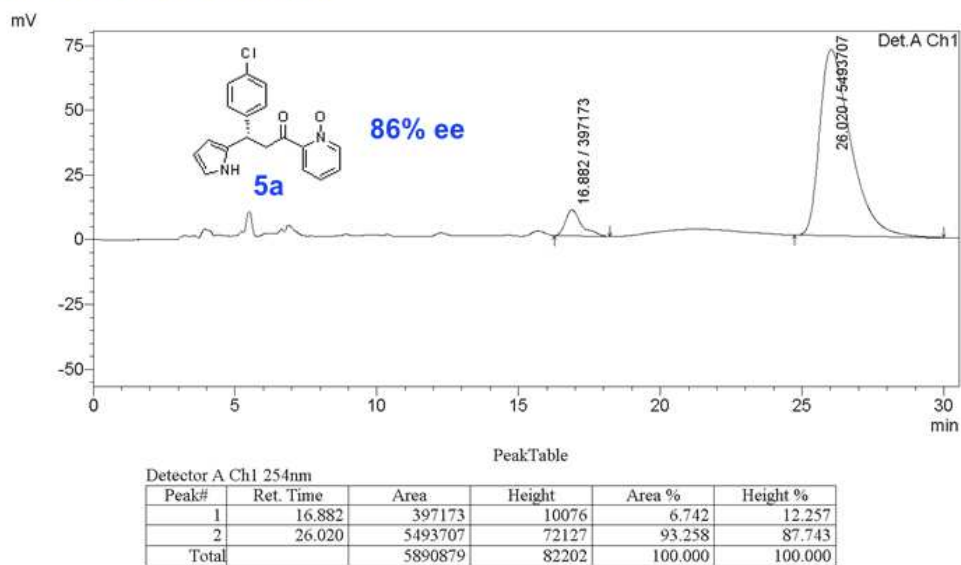



### Hplc chromatogram of 5b (racemic)

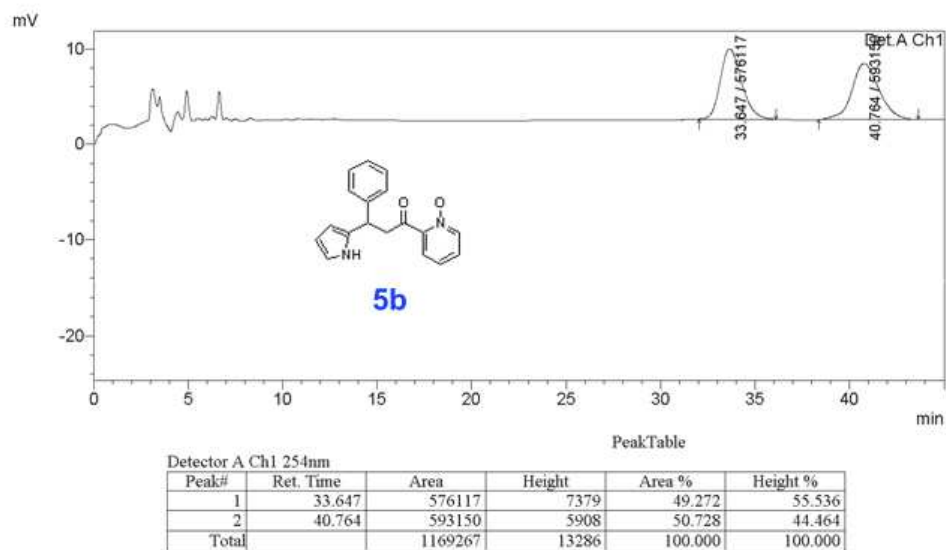

### Hplc chromatogram of 5b (chiral)

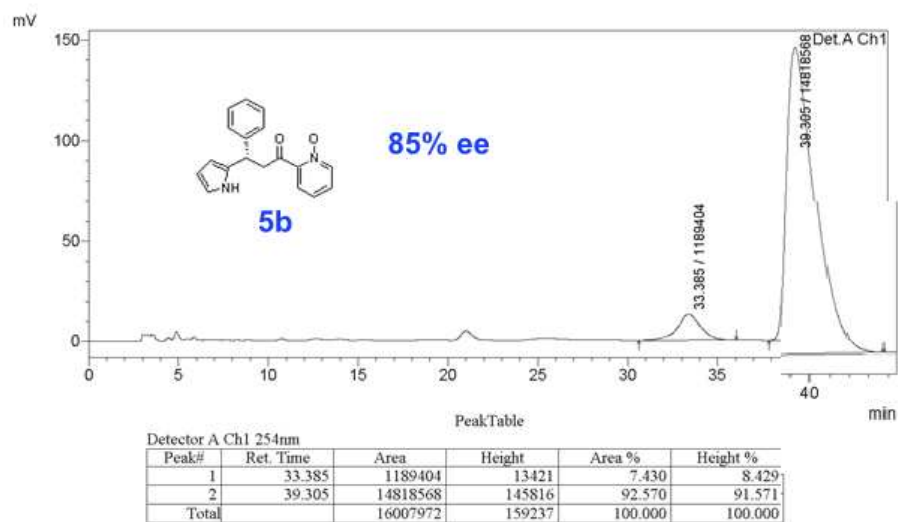

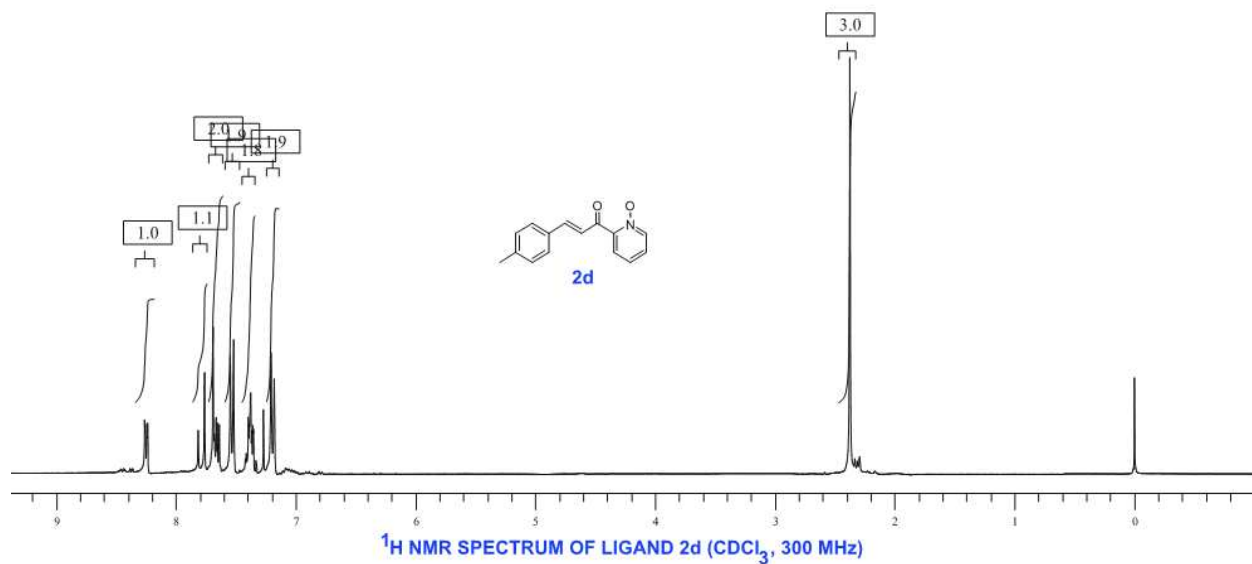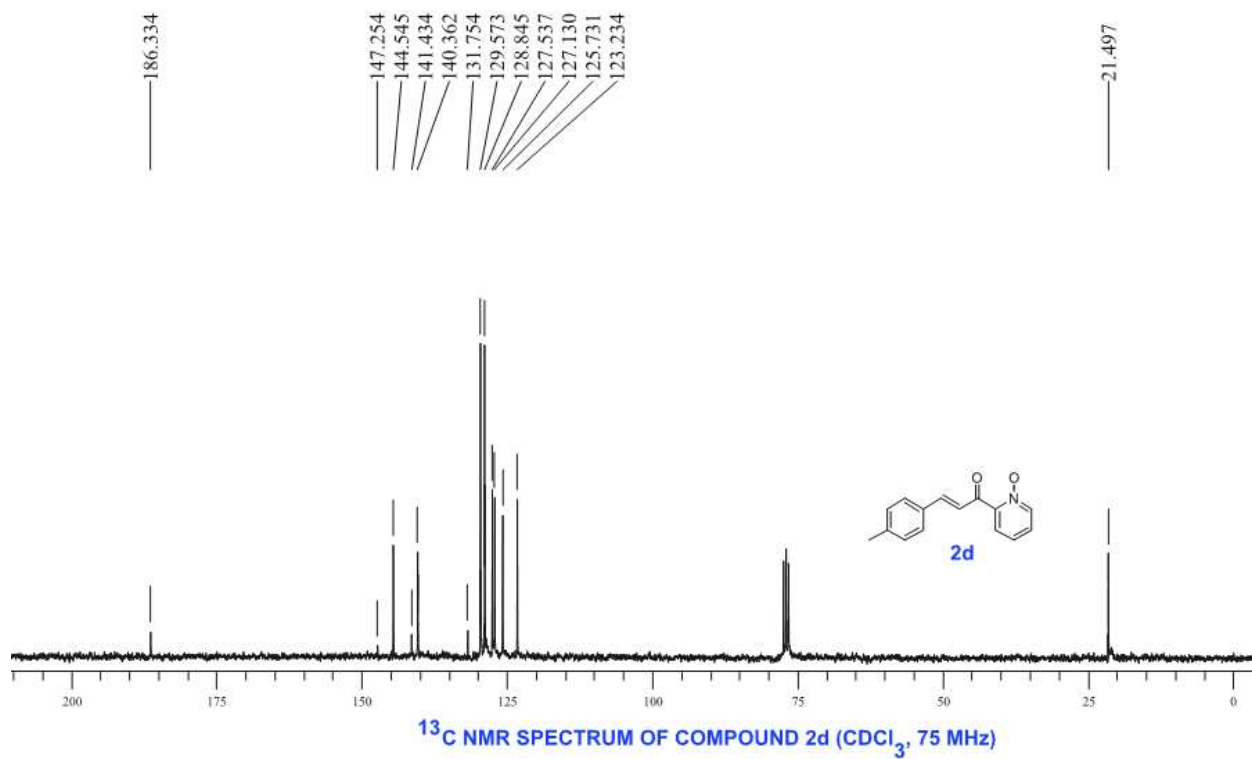

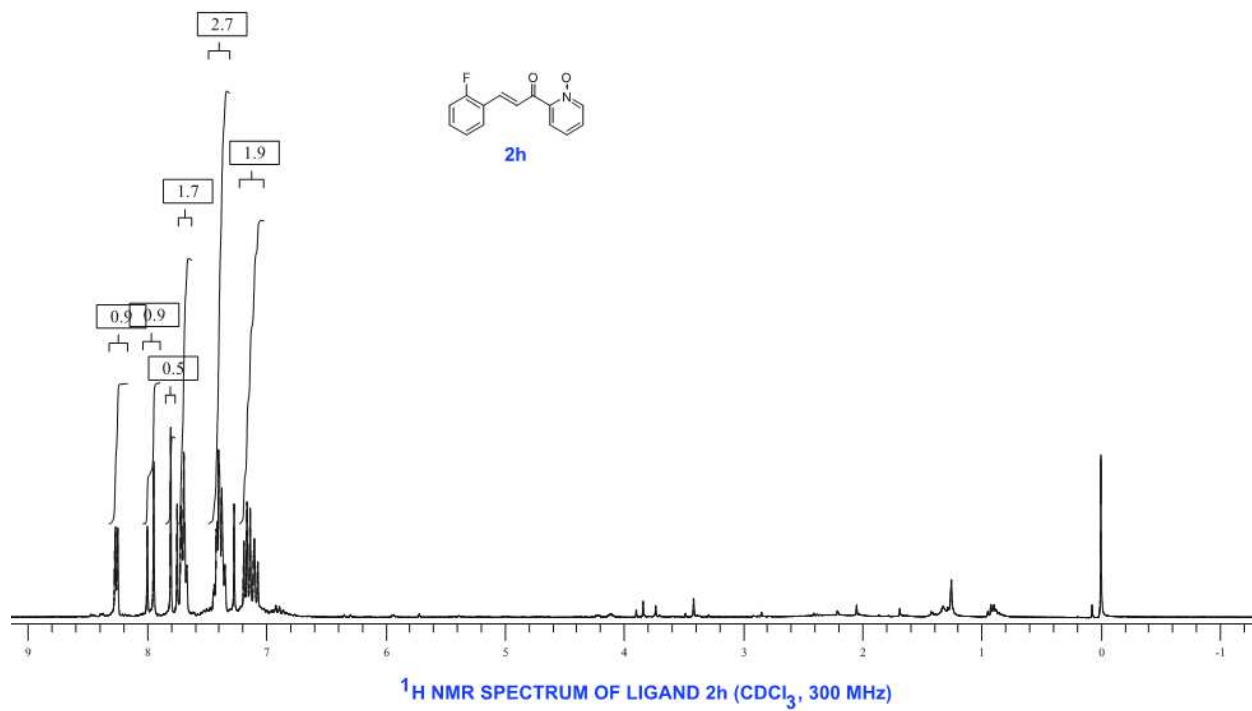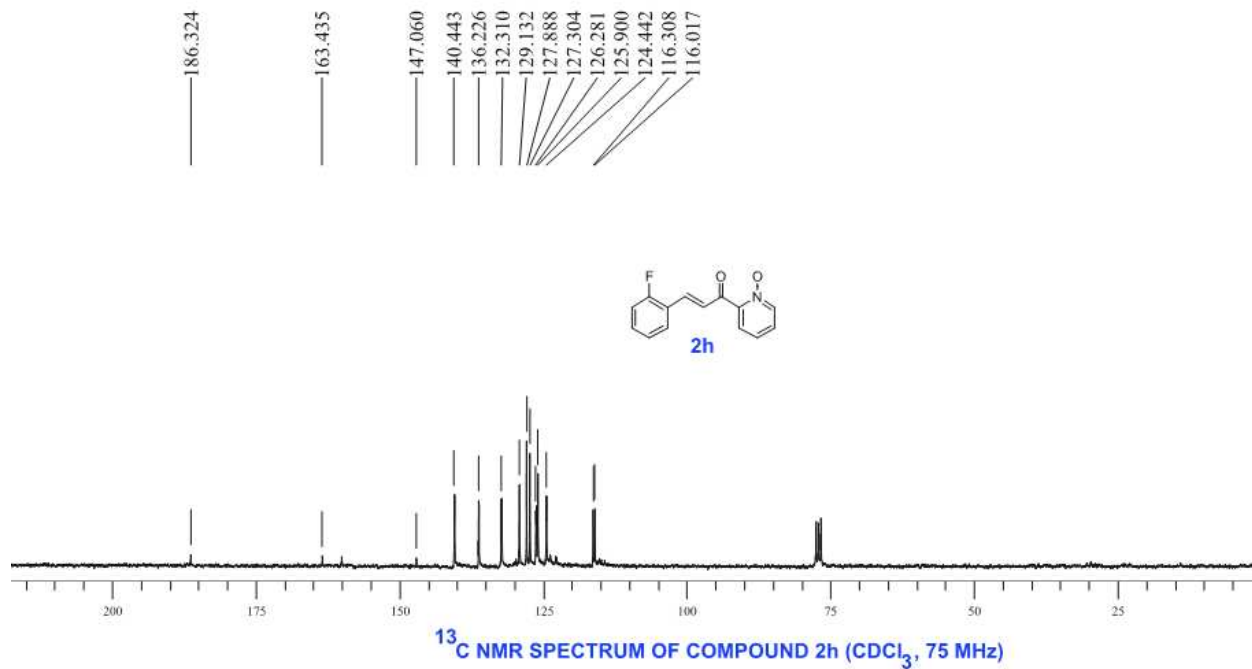

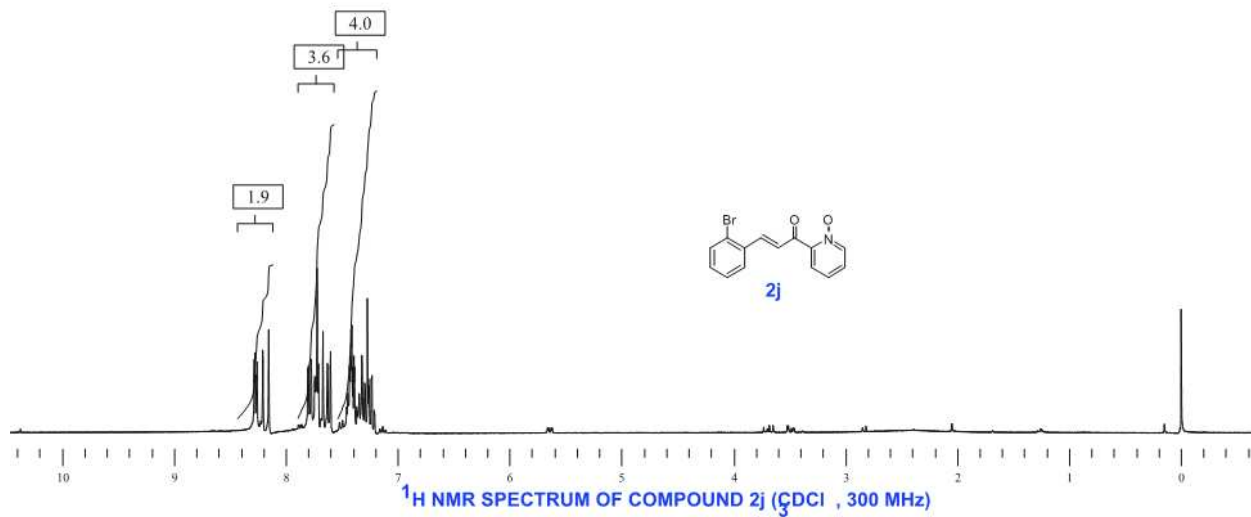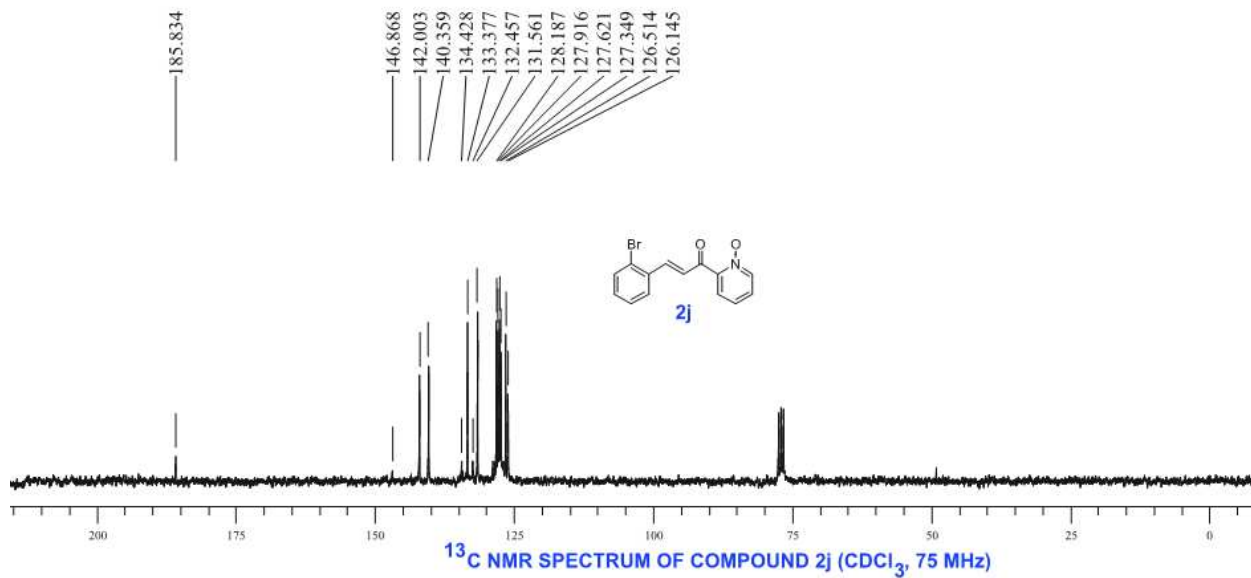

Supplement: c2ob25315a.pdf [file c2ob25315a.pdf]
